# Supplementary material for: Modulation of the magnetic and photophysical properties in 3d–4f and 4f–4f′ heterobimetallic complexes involving a tetrathiafulvalene-based ligand
Source: Royal Society of Chemistry journal article supplement (doi:10.1039/d2dt02375j), 2022-01-01
Supplement: d2dt02375j1.pdf [file d2dt02375j1.pdf]

**Supporting information for**

**Modulation of the Magnetic and Photophysical**

**Properties of 3d4f and 4f4f' Heterobimetallic**

**Complexes Involving a Tetrathiafulvalene-Based**

**Ligand**

*Haiet Douib,<sup>a,b</sup> Jessica Flores Gonzalez,<sup>a</sup> Saskia Speed,<sup>c,d</sup> Vincent Montigaud,<sup>a</sup> Bertrand Lefevre,<sup>a</sup> Vincent Dorcet,<sup>a</sup> François Riobé,<sup>c</sup> Olivier Maury,<sup>c</sup> Abdelkrim Gouasmia,<sup>b</sup> Boris le Guennic,<sup>a</sup> Olivier Cador,<sup>\*a</sup> and Fabrice Pointillart<sup>\*a</sup>*

<sup>a</sup> Institut des Sciences Chimiques de Rennes UMR 6226 CNRS-UR1, Université de Rennes 1,  
35042 Rennes Cedex, France

<sup>b</sup> Laboratoire des Matériaux Organiques et Hétérochimie (LMOH), Département des sciences  
de la matière, Université Larbi Tébessi de Tébessa, Route de Constantine 12002, Tébessa,  
Algérie.

<sup>c</sup> Univ Lyon, ENS de Lyon, CNRS UMR 5182, Université Claude Bernard Lyon 1,  
Laboratoire de Chimie, F69342, Lyon, France.

<sup>d</sup> Departament de Química Inorgànica i Orgànica, Secció de Química Inorgànica, Universitat  
de Barcelona, Martí i Franquès 1-11, 08028 Barcelona, Spain.

[Olivier.cador@univ-rennes1.fr](mailto:Olivier.cador@univ-rennes1.fr), [fabrice.pointillart@univ-rennes1.fr](mailto:fabrice.pointillart@univ-rennes1.fr)

## Experimental

**Synthesis. General Procedures and Materials.** The precursors  $\text{Ln}(\text{hfac})_3 \cdot n\text{H}_2\text{O}$  ( $\text{Ln}(\text{III}) = \text{Pr}$  and  $\text{Nd}$  with  $n = 3$ ,  $\text{Dy}$  and  $\text{Yb}$  with  $n = 2$ ;  $\text{hfac}^- = 1,1,1,5,5,5$ -hexafluoroacetylacetonate anion),<sup>1</sup>  $\text{Dy}(\text{tta})_3 \cdot 2\text{H}_2\text{O}$ <sup>2</sup> and the ligand 2-{1-[2,6-di(pyrazol-1-yl)-4-methylpyridyl]-4,5-[4,5-bis(propylthio)-tetrathiafulvalenyl]-1*H*-benzimidazol-2-yl}pyridine (**L**) were synthesized following previously reported methods.<sup>3</sup> All other reagents were purchased from Aldrich Co., Ltd. and used without further purification.

### Synthesis of complexes 1-10.

$[\text{MLn}(\text{hfac})_5(\text{L})]_n \cdot x(\text{CH}_2\text{Cl}_2) \cdot y(\text{C}_6\text{H}_{14})$  (**M**=Cd, **Ln**=Dy,  $n=2$ ,  $x=0$  and  $y=0$  (**1**); **M**=Zn, **Ln**=Dy,  $n=1$ ,  $x=2$  and  $y=1$  (**2**); **M**=Zn, **Ln**=Yb,  $n=2$ ,  $x=1$  and  $y=2$  (**3**); **M**=Mn, **Ln**=Dy,  $n=1$ ,  $x=2$  and  $y=0$  (**4**); **M**=Mn, **Ln**=Yb,  $n=1$ ,  $x=2$  and  $y=0$  (**5**); **M**=Co, **Ln**=Y,  $n=1$ ,  $x=1$  and  $y=0$  (**6**); **M**=Co, **Ln**=Dy,  $n=1$ ,  $x=2$  and  $y=1$  (**7**); **M**=Co, **Ln**=Yb,  $n=1$ ,  $x=0$  and  $y=0$  (**8**); **M**=Ni, **Ln**=Dy,  $n=1$ ,  $x=2$  and  $y=1$  (**9**); **M**=Ni, **Ln**=Yb,  $n=1$ ,  $x=0$  and  $y=0$  (**10**)). 0.02 mmol of  $\text{M}(\text{hfac})_2 \cdot 2\text{H}_2\text{O}$  were dissolved in 5 mL of  $\text{CH}_2\text{Cl}_2$  and then added to a solution of 10 mL of  $\text{CH}_2\text{Cl}_2$  containing 14.8 mg of **L** (0.02 mmol). After 20 min of stirring, 0.02 mmol of  $\text{Ln}(\text{hfac})_3 \cdot 2\text{H}_2\text{O}$  previously dissolved in 5 mL of  $\text{CH}_2\text{Cl}_2$  were added to the dark red mixture. 40 mL of *n*-hexane were layered at room temperature in the dark. Slow diffusion leads to dark red single crystals which are suitable for X-ray studies. Yields (**1**) 29 mg (71 %), (**2**) 30 mg (66 %), (**3**) 26 mg (63 %), (**4**) 34 mg (78 %), (**5**) 33 mg (76 %), (**6**) 29 mg (66 %), (**7**) 31 mg (69 %), (**8**) 26 mg (65 %), (**9**) 32 mg (70 %) and (**10**) 29 mg (71 %). Representative I.R. bands (KBr): 3142, 2970, 2932, 2871, 2878, 1655, 1578, 1556, 1531, 1502, 1465, 1410, 1258, 1205, 1146, 1056, 973, 797, 663 and  $583 \text{ cm}^{-1}$ . Anal. Calcd (%) for  $\text{C}_{118}\text{H}_{70}\text{Cd}_2\text{Dy}_2\text{F}_{60}\text{N}_{16}\text{O}_{20}\text{S}_{12}$  (**1**): C 34.48, H 1.70, N 5.45; found: C 34.81, H 1.86, N, 5.29. Anal. Calcd (%) for  $\text{C}_{67}\text{H}_{53}\text{Cl}_4\text{ZnF}_{30}\text{N}_8\text{O}_{10}\text{S}_6\text{Dy}$  (**2**): C 35.56, H 2.34, N 4.95; found: C 35.51, H 2.26, N, 4.89. Anal. Calcd (%) for  $\text{C}_{119}\text{H}_{72}\text{Zn}_2\text{Yb}_2\text{F}_{60}\text{N}_{16}\text{O}_{21}\text{S}_{12}\text{Cl}_2$  (**3**): C 34.54, H 1.74, N 5.42; found: C 34.91, H 1.99, N, 5.29. Anal. Calcd (%) for  $\text{C}_{61}\text{H}_{39}\text{MnDyF}_{30}\text{N}_8\text{O}_{10}\text{S}_6\text{Cl}_4$  (**4**): C 33.80, H 1.80, N 5.17; found: C 33.71, H 1.86, N, 5.09. Calcd (%) for  $\text{C}_{61}\text{H}_{39}\text{MnYbF}_{30}\text{N}_8\text{O}_{10}\text{S}_6\text{Cl}_4$  (**5**): C 33.64, H 1.79, N 5.15; found: C 33.61, H 1.86, N, 5.19. Anal. Calcd (%) for  $\text{C}_{67}\text{H}_{53}\text{Cl}_4\text{CoF}_{30}\text{N}_8\text{O}_{10}\text{S}_6\text{Y}$  (**6**): C 36.84, H 2.43, N 5.13; found: C 36.71, H 2.36, N, 5.05. Anal. Calcd (%) for  $\text{C}_{67}\text{H}_{53}\text{Cl}_4\text{CoF}_{30}\text{N}_8\text{O}_{10}\text{S}_6\text{Dy}$  (**7**): C 35.64, H 2.35, N 4.97; found: C 35.61, H 2.30, N, 4.79. Anal. Calcd (%) for  $\text{C}_{59}\text{H}_{35}\text{CoF}_{30}\text{N}_8\text{O}_{10}\text{S}_6\text{Yb}$  (**8**): C 35.22, H 1.74, N 5.57; found: C 35.61, H 1.99, N, 5.29. Anal. Calcd (%) for  $\text{C}_{67}\text{H}_{53}\text{Cl}_4\text{NiF}_{30}\text{N}_8\text{O}_{10}\text{S}_6\text{Dy}$

(9): C 35.65, H 2.35, N 4.97; found: C 35.71, H 2.33 N, 4.78. Anal. Calcd (%) for  $C_{59}H_{35}NiF_{30}N_8O_{10}S_6Yb$  (10): C 35.22, H 1.74, N 5.57; found: C 35.52, H 1.96 N, 5.37

**Synthesis of the complex  $[ZnDy(tta)_2(hfac)_3(L)] \cdot (CH_2Cl_2)$  (11).** 10.4 mg of  $Zn(hfac)_2 \cdot 2H_2O$  (0.02 mmol) were dissolved in 5 mL of  $CH_2Cl_2$  and then added to a solution of 10 mL of  $CH_2Cl_2$  containing 14.8 mg of **L** (0.02 mmol). After 20 min of stirring, 17.2 mg of  $Dy(tta)_3 \cdot 2H_2O$  (0.02 mmol) previously dissolved in 5 mL of  $CH_2Cl_2$  were added to the dark red mixture. 40 mL of *n*-hexane were layered at room temperature in the dark. Slow diffusion leads to red single crystals which are suitable for X-ray studies. Yield 19 mg (44 %). I.R. (KBr): 3138, 2965, 2929, 2874, 2878, 1657, 1604, 1582, 1534, 1504, 1462, 1411, 1355, 1308, 1254, 1201, 1144, 1058, 970, 792, 721, 660 and  $581\text{ cm}^{-1}$ . Anal. Calcd (%) for  $C_{66}H_{43}Cl_2DyZnF_{24}N_8O_{10}S_8$ : C 37.37, H 2.03, N 5.28; found: C 37.51, H 2.16 N, 5.09.

**Synthesis of the complex  $[Cu(hfac)(CH_3OH)(L')] \cdot 0.5(C_6H_{14})$  (12).** 10.4 mg of  $Cu(hfac)_2 \cdot 2H_2O$  (0.02 mmol) were dissolved in 5 mL of  $CH_2Cl_2$  and then added to a solution of 10 mL of  $CH_2Cl_2$  containing 14.8 mg of **L** (0.02 mmol). After 20 min of stirring, 16.4 mg of  $Dy(hfac)_3 \cdot 2H_2O$  (0.02 mmol) previously dissolved in 5 mL of  $CH_2Cl_2$  were added to the dark red mixture. Few drops of MeOH were finally added leading to the formation of an orange solution. 40 mL of *n*-hexane were layered at room temperature in the dark. Slow diffusion leads to orange single crystals which are suitable for X-ray studies. Yield 11 mg (64 %). I.R. (KBr): 3146, 2967, 2932, 2872, 1654, 1558, 1534, 1504, 1463, 1413, 1258, 1206, 1145, 799, 662 and  $586\text{ cm}^{-1}$ . Anal. Calcd (%) for  $C_{31}H_{31}CuF_6N_1O_3S_6$ : C 43.08, H 3.59, N 1.62; found: C 43.01, H 3.66 N, 1.59.

**Synthesis of the complex  $[Cu(H_2O)Dy(hfac)_4(L)] \cdot [Dy(hfac)_4] \cdot (CH_2Cl_2)$  (13).** This compound was obtained using the same experimental protocol as for **12** except that no methanol was used. Slow diffusion of *n*-hexane leads to purple single crystals which are suitable for X-ray studies. Yield 38 mg (66 %). I.R. (KBr): 3138, 3093, 2967, 2934, 2876, 1654, 1617, 1575, 1529, 1492, 1468, 1259, 1208, 1144, 793, 664 and  $585\text{ cm}^{-1}$ . Anal. Calcd (%) for  $C_{75}H_{40}Cl_2CuDy_2F_{48}N_8O_{17}S_6$ : C 31.15, H 1.38, N 3.88; found: C 31.11, H 1.36 N, 3.93.

**$[Pr(hfac)_3(L)]_2 \cdot 0.25(CH_2Cl_2) \cdot 0.5(C_6H_{14})$  (14).** 32.7 mg of  $Pr(hfac)_3 \cdot 3H_2O$  (0.04 mmol) were dissolved in 10 mL of  $CH_2Cl_2$  and then added to a solution of 10 mL of  $CH_2Cl_2$  containing 14.8 mg of **L** (0.02 mmol). After 1 h of stirring, 40 mL of *n*-hexane were layered at room temperature in the dark. Slow diffusion leads to orange single crystals

which are suitable for X-ray studies. Yield 25 mg (41 %). Anal. Calcd (%) for  $C_{101.25}H_{73.5}Cl_{0.5}Pr_2F_{36}N_{16}O_{12}S_{12}$ : C 39.52, H 2.39, N 7.29; found: C 39.49, H 2.36, N 7.24. I.R. (KBr): 2957, 2870, 2853, 1654, 1574, 1557, 1532, 1506, 1465, 1410, 1258, 1207, 1146, 1099, 1057, 975, 799, 660 and  $587\text{ cm}^{-1}$ .

**[Dy<sub>1.21</sub>Nd<sub>0.79</sub>(hfac)<sub>6</sub>(L)]·2(CH<sub>2</sub>Cl<sub>2</sub>)·(C<sub>6</sub>H<sub>14</sub>) (15)**. 16.4 mg of Nd(hfac)<sub>3</sub>·3H<sub>2</sub>O (0.02 mmol) were dissolved in 5 mL of CH<sub>2</sub>Cl<sub>2</sub> and then added to a solution of 10 mL of CH<sub>2</sub>Cl<sub>2</sub> containing 14.8 mg of **L** (0.02 mmol). After 15 min of stirring at room temperature, 16.4 mg of Dy(hfac)<sub>3</sub>·2H<sub>2</sub>O (0.02 mmol) dissolved in 5 mL of CH<sub>2</sub>Cl<sub>2</sub> were added to the orange mixture leading to a deep red solution. After additional 15 min of stirring, 40 mL of *n*-hexane were layered at room temperature in the dark. Slow diffusion leads to deep red single crystals which are suitable for X-ray studies. Yield 31 mg (61 %). Anal. Calcd (%) for  $C_{72}H_{54}Cl_4Dy_{1.21}F_{36}N_8Nd_{0.79}O_{12}S_6$ : C 33.87, H 2.18, N 4.39; found: C 33.59, H 2.16, N 4.48. I.R. (KBr): 3146, 2972, 2934, 2878, 1652, 1558, 1533, 1500, 1464, 1411, 1257, 1208, 1145, 1099, 1058, 974, 800, 661 and  $585\text{ cm}^{-1}$ .

**[Dy<sub>1.11</sub>Nd<sub>0.89</sub>(tta)<sub>3</sub>(hfac)<sub>3</sub>(L)] (16)**. 16.4 mg of Nd(hfac)<sub>3</sub>·3H<sub>2</sub>O (0.02 mmol) were dissolved in 5 mL of CH<sub>2</sub>Cl<sub>2</sub> and then added to a solution of 10 mL of CH<sub>2</sub>Cl<sub>2</sub> containing 14.8 mg of **L** (0.02 mmol). After 15 min of stirring at room temperature, 17.2 mg of Dy(tta)<sub>3</sub>·2H<sub>2</sub>O (0.02 mmol) dissolved in 5 mL of CH<sub>2</sub>Cl<sub>2</sub> were added to the orange mixture leading to a deep red solution. After additional 15 min of stirring, 40 mL of *n*-hexane were layered at room temperature in the dark. Slow diffusion leads to deep red single crystals which are suitable for X-ray studies. Yield 31 mg (61 %). Anal. Calcd (%) for  $C_{73}H_{45}Dy_{1.11}F_{27}N_8Nd_{0.89}O_{12}S_9$ : C 37.49, H 1.93, N 4.79; found: C 37.01, H 1.86, N 4.48. I.R. (KBr): 3140, 2964, 2927, 2874, 1655, 1603, 1582, 1535, 1505, 1460, 1411, 1355, 1307, 1253, 1200, 1142, 1058, 969, 792, 720, 659 and  $582\text{ cm}^{-1}$ .

**[Yb<sub>1.04</sub>Nd<sub>0.96</sub>(hfac)<sub>6</sub>(L)] (17)**. 16.4 mg of Nd(hfac)<sub>3</sub>·3H<sub>2</sub>O (0.02 mmol) were dissolved in 5 mL of CH<sub>2</sub>Cl<sub>2</sub> and then added to a solution of 10 mL of CH<sub>2</sub>Cl<sub>2</sub> containing 14.8 mg of **L** (0.02 mmol). After 15 min of stirring at room temperature, 16.6 mg of Yb(hfac)<sub>3</sub>·2H<sub>2</sub>O (0.02 mmol) dissolved in 5 mL of CH<sub>2</sub>Cl<sub>2</sub> were added to the orange mixture leading to a deep red solution. After additional 15 min of stirring, 40 mL of *n*-hexane were layered at room temperature in the dark. Slow diffusion leads to deep red single crystals which are suitable for X-ray studies. Yield 30 mg (64 %). Anal. Calcd (%) for  $C_{70}H_{50}F_{36}N_8Yb_{1.04}Nd_{0.96}O_{12}S_6$ : C 35.17, H 2.09, N 4.69; found: C 35.01, H 1.96

N, 4.78. I.R. (KBr): 3142, 2971, 2940, 2878, 1652, 1558, 1533, 1501, 1464, 1410, 1259, 1206, 1145, 1099, 1060, 975, 799, 661 and 583 cm<sup>-1</sup>.

**[Nd<sub>2</sub>(hfac)<sub>6</sub>(L)] (18).** 32.8 mg of Nd(hfac)<sub>3</sub>·3H<sub>2</sub>O (0.04 mmol) were dissolved in 10 mL of CH<sub>2</sub>Cl<sub>2</sub> and then added to a solution of 10 mL of CH<sub>2</sub>Cl<sub>2</sub> containing 14.8 mg of **L** (0.02 mmol). After 15 min of stirring at room temperature, the orange solution was refluxed for 1h leading to a deep red solution. After additional 15 min of stirring at room temperature, 40 mL of *n*-hexane were layered at room temperature in the dark. Slow diffusion leads to deep red single crystals which are suitable for X-ray studies. Yield 32 mg (68 %). Anal. Calcd (%) for C<sub>70</sub>H<sub>50</sub>F<sub>36</sub>N<sub>8</sub>Nd<sub>2</sub>O<sub>12</sub>S<sub>6</sub>: C 35.59, H 2.12, N 4.75; found: C 35.11, H 2.00 N, 4.80. I.R. (KBr): 3142, 2970, 2938, 2878, 1652, 1558, 1533, 1500, 1465, 1410, 1257, 1206, 1145, 1099, 1058, 975, 798, 661 and 585 cm<sup>-1</sup>.

**[YbPr(hfac)<sub>6</sub>(L)] (19). Method a.** 16.4 mg of Pr(hfac)<sub>3</sub>·3H<sub>2</sub>O (0.02 mmol) were dissolved in 5 mL of CH<sub>2</sub>Cl<sub>2</sub> and then added to a solution of 10 mL of CH<sub>2</sub>Cl<sub>2</sub> containing 14.8 mg of **L** (0.02 mmol). After 15 min of stirring at room temperature, 16.6 mg of Yb(hfac)<sub>3</sub>·2H<sub>2</sub>O (0.02 mmol) dissolved in 5 mL of CH<sub>2</sub>Cl<sub>2</sub> were added to the orange mixture leading to a deep red solution. After additional 15 min of stirring, 40 mL of *n*-hexane were layered at room temperature in the dark. Slow diffusion leads to deep red single crystals which are suitable for X-ray studies. Yield 33 mg (71 %).

**Method b.** 15.4 mg of single crystals of **14** (0.005 mmol) were dissolved in 10 mL of CH<sub>2</sub>Cl<sub>2</sub> and then added to a solution of 5 mL of CH<sub>2</sub>Cl<sub>2</sub> containing 8.3 mg of Yb(hfac)<sub>3</sub>·2H<sub>2</sub>O (0.01 mmol) was added to the orange mixture leading to a deep red solution. After additional 15 min of stirring, 40 mL of *n*-hexane were layered at room temperature in the dark. Slow diffusion leads to deep red single crystals which are suitable for X-ray studies. Yield 18 mg (80 %).

Anal. Calcd (%) for C<sub>64</sub>H<sub>36</sub>YbF<sub>36</sub>N<sub>8</sub>PrO<sub>12</sub>S<sub>6</sub>: C 33.40, H 1.57, N 4.87; found: C 34.00, H 1.66 N, 4.62. I.R. (KBr): 3142, 2970, 2937, 2878, 1652, 1558, 1533, 1501, 1465, 1411, 1258, 1206, 1145, 1100, 1057, 973, 799, 660 and 585 cm<sup>-1</sup>.

**Crystallography.** Single crystals of **1, 3, 4, 6, 8, 11-13, 15-19** were mounted on a D8 VENTURE Bruker-AXS diffractometer for data collection (MoK<sub>α</sub> radiation source, λ = 0.71073 Å), from the Centre de Diffractométrie X (CDIFX), Université de Rennes 1, France while single crystal of **14** was mounted on a APEXII Bruker-AXS diffractometer (Tables S1 and S2).

Structures were solved with a direct method using the SHELXT program<sup>4</sup> and refined with a full matrix least-squares method on  $F^2$  using the SHELXL-14/7 program<sup>5</sup>. For all the other compounds (**2**, **5**, **7**, **9** and **10**), the cells were recorded on the D8 VENTURE Bruker-AXS diffractometer (Table S3). SQUEEZE procedure of PLATON<sup>6</sup> was performed for structures containing large solvent accessible voids in which residual peak of diffraction were observed. The ratio of metallic center on each crystallographic site were fixed from the values determined by Energy Dispersive Spectrometry. Crystallographic data are summarized in Tables S1-S3. Complete crystal structure results as a CIF file including bond lengths, angles, and atomic coordinates are deposited as Supporting Information.

**Physical Measurements.** The elemental analyses of the compounds were performed at the Centre Régional de Mesures Physiques de l'Ouest, Rennes. The Ln/Ln' ratio of the compounds **15-17** were determined using SEM (Scanning Electron Microscopy). All observations and measurements were carried out with a JEOL JSM 6400 scanning electron microscope (JEOL Ltd., Tokyo, Japan) with an EDS (Energy Dispersive Spectrometry) analysis system (OXFORD Link INCA). The voltage was kept at 9 kV, and the samples were mounted on carbon stubs and coated for 5 min with a gold/palladium alloy using a sputter coater (Jeol JFC 1100). Each ratio given in the text is the average value between at least three measurements. This analysis has been performed by the "Centre de Microscopie Electronique à Balayage et microAnalyse (CMEBA)" from the University of Rennes 1 (France). Cyclic voltammetry was carried out in  $\text{CH}_2\text{Cl}_2$  solution, containing 0.1 M  $\text{N}(\text{C}_4\text{H}_9)_4\text{PF}_6$  as supporting electrolyte. Voltammograms were recorded at  $100 \text{ mVs}^{-1}$  at a platinum disk electrode. The potentials were measured *versus* a saturated calomel electrode (SCE). Absorption spectra were recorded on a Varian Cary 5000 UV-Visible-NIR spectrometer equipped with an integration sphere. The luminescence spectra were measured using a Horiba-Jobin Yvon Fluorolog-3® spectrofluorimeter, equipped with a three slit double grating excitation and emission monochromator with dispersions of 2.1 nm/mm (1200 grooves/mm). The steady-state luminescence was excited by unpolarized light from a 450 W xenon CW lamp and detected at a  $90^\circ$  angle by either a Hamamatsu R928 photomultiplier tube (300-800 nm) or an InGaAs near -infrared detector (850-1600 nm). The magnetization of all the compounds have been measured with a Quantum Design MPMS-XL operating between 2 and 300 K. For the  $\chi_M T$  vs. T plots, with  $\chi_M$  the molar magnetic susceptibility and T the temperature in Kelvin, two procedures have been applied depending on the amplitude of the magnetic moment. For Yb(III)-based samples a magnetic field of 2 kOe is applied below 20 K and of 10 kOe above. For Dy(III)-based samples a magnetic field of 0.2

kOe is applied below 20 K, 2 kOe between 20 and 80 K and finally 10 kOe above 80 K. All the magnetization curves have been measured at 2 K. In ac mode, an oscillating field of 3 Oe is applied at frequencies comprised between 1 and 1000 Hz with a Quantum Design MPMS-XL and between 10 and 10000 Hz with a Quantum Design PPMS. For all samples, the magnetization is corrected for intrinsic diamagnetism evaluated with Pascal's tables and the extrinsic diamagnetism of the sample holder (Teflon tape).

### Details for EDS (Energy Dispersive Spectrometry) analysis:

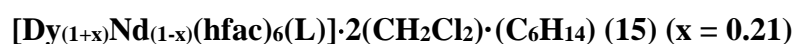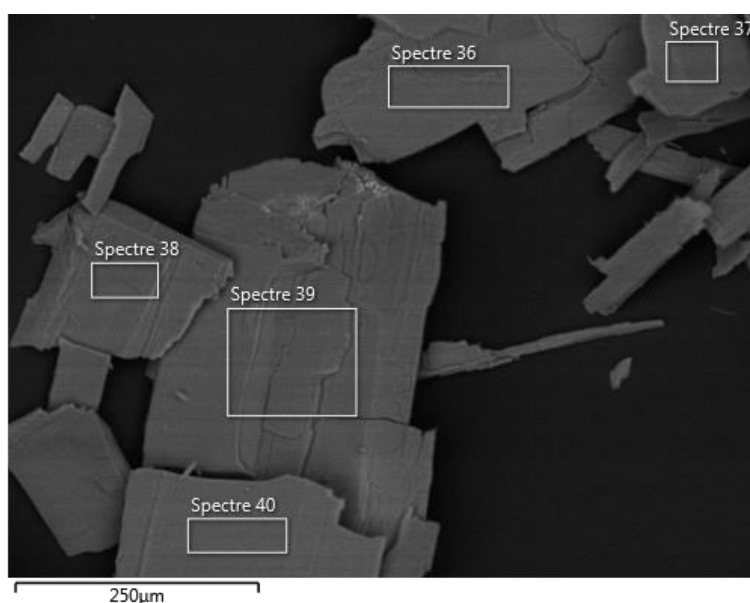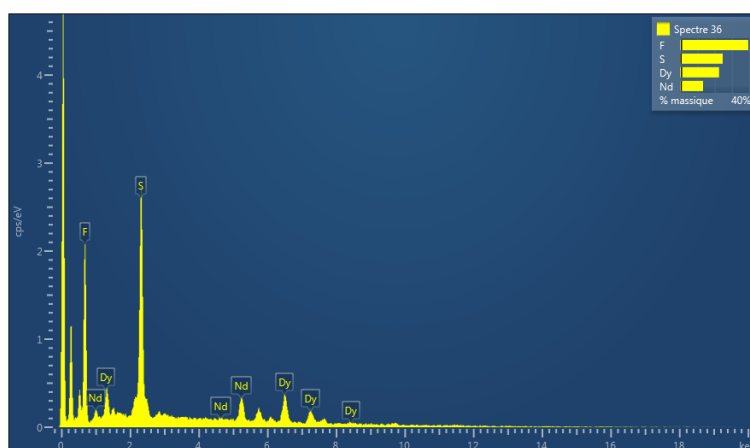

| Element                 | Type of transition | % Mass | % atomic |
|-------------------------|--------------------|--------|----------|
| F                       | K edge             | 39.43  | 67.47    |
| S                       | K edge             | 24.68  | 25.02    |
| Nd                      | L edge             | 13.32  | 3.00     |
| Dy                      | L edge             | 22.56  | 4.51     |
| Total:                  |                    | 100.00 | 100.00   |
| Nd/Dy ratio (1-x)/(1+x) |                    |        | 0.65     |

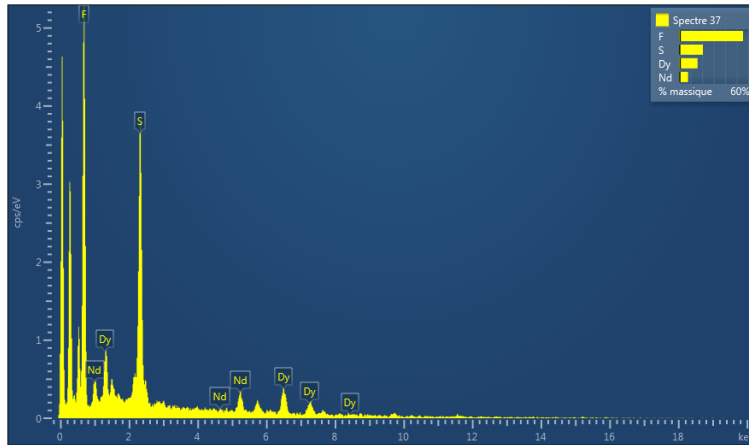

| Element                 | Type of transition | % Mass | % atomic |
|-------------------------|--------------------|--------|----------|
| F                       | K edge             | 55.50  | 78.57    |
| S                       | K edge             | 20.65  | 17.32    |
| Nd                      | L edge             | 7.82   | 1.46     |
| Dy                      | L edge             | 16.03  | 2.65     |
| Total:                  |                    | 100.00 | 100.00   |
| Nd/Dy ratio (1-x)/(1+x) |                    |        | 0.55     |

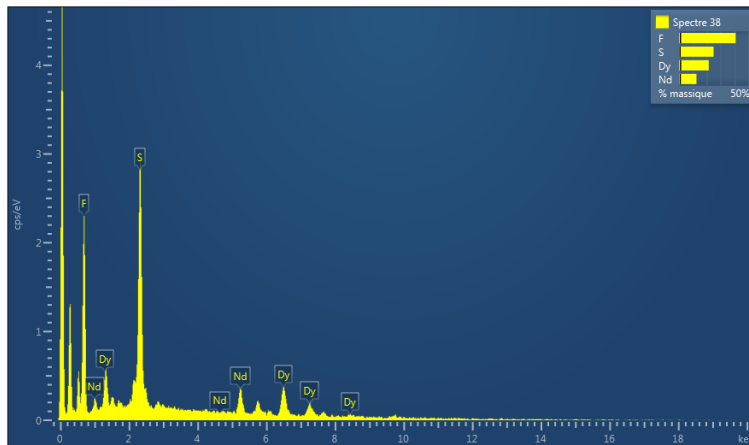

| Element                 | Type of transition | % Mass | % atomic |
|-------------------------|--------------------|--------|----------|
| F                       | K edge             | 40.93  | 68.35    |
| S                       | K edge             | 24.93  | 24.67    |
| Nd                      | L edge             | 12.64  | 2.78     |
| Dy                      | L edge             | 21.50  | 4.20     |
| Total:                  |                    | 100.00 | 100.00   |
| Nd/Dy ratio (1-x)/(1+x) |                    |        | 0.66     |



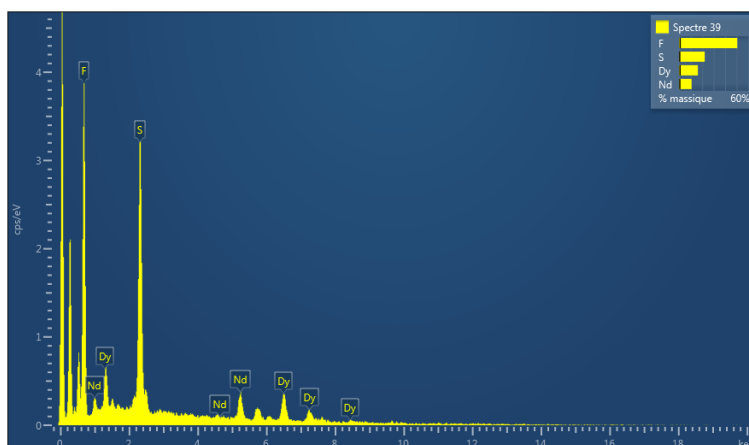

| Element                 | Type of transition | % Mass | % atomic |
|-------------------------|--------------------|--------|----------|
| F                       | K edge             | 50.52  | 75.32    |
| S                       | K edge             | 22.31  | 19.71    |
| Nd                      | L edge             | 10.86  | 2.13     |
| Dy                      | L edge             | 16.31  | 2.84     |
| Total:                  |                    | 100.00 | 100.00   |
| Nd/Dy ratio (1-x)/(1+x) |                    |        | 0.75     |

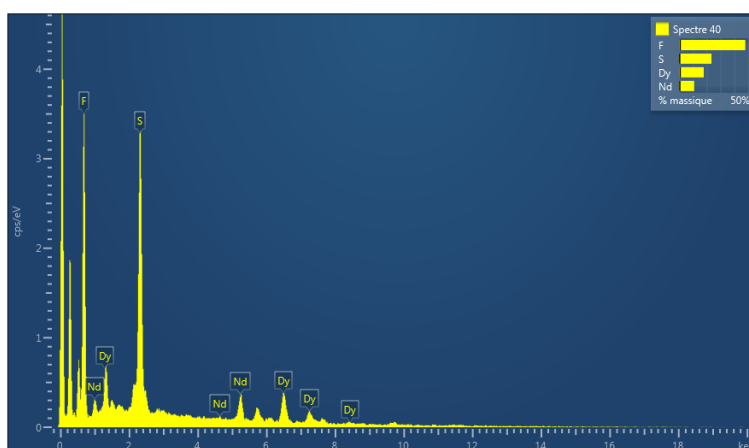

| Element                 | Type of transition | % Mass | % atomic |
|-------------------------|--------------------|--------|----------|
| F                       | K edge             | 47.87  | 73.36    |
| S                       | K edge             | 23.39  | 21.24    |
| Nd                      | L edge             | 10.88  | 2.20     |
| Dy                      | L edge             | 17.86  | 3.20     |
| Total:                  |                    | 100.00 | 100.00   |
| Nd/Dy ratio (1-x)/(1+x) |                    |        | 0.75     |

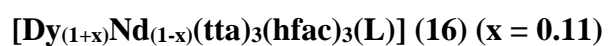

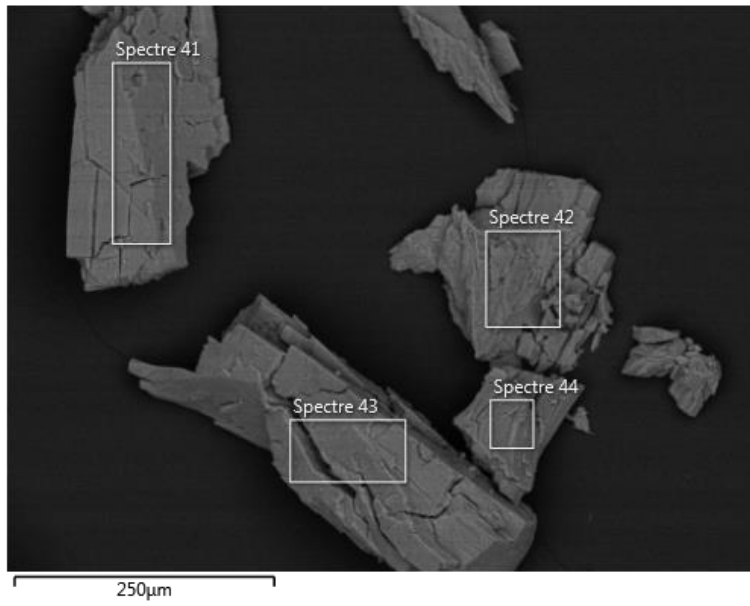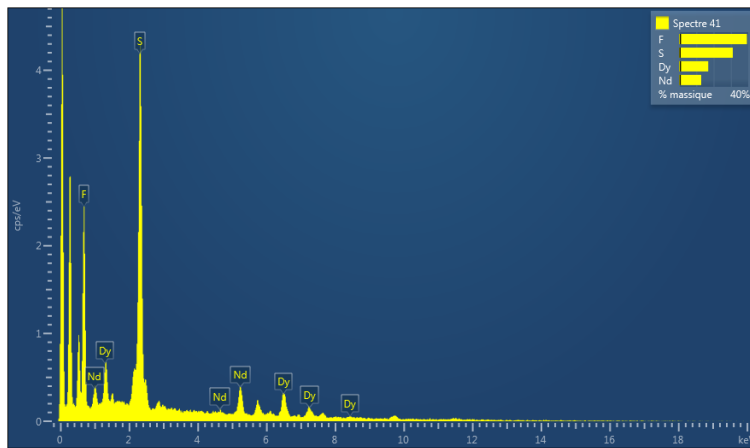

| Element                 | Type of transition | % Mass | % atomic |
|-------------------------|--------------------|--------|----------|
| F                       | K edge             | 39.21  | 63.98    |
| S                       | K edge             | 31.08  | 30.05    |
| Nd                      | L edge             | 12.83  | 2.76     |
| Dy                      | L edge             | 16.87  | 3.22     |
| Total:                  |                    | 100.00 | 100.00   |
| Nd/Dy ratio (1-x)/(1+x) |                    |        | 0.86     |

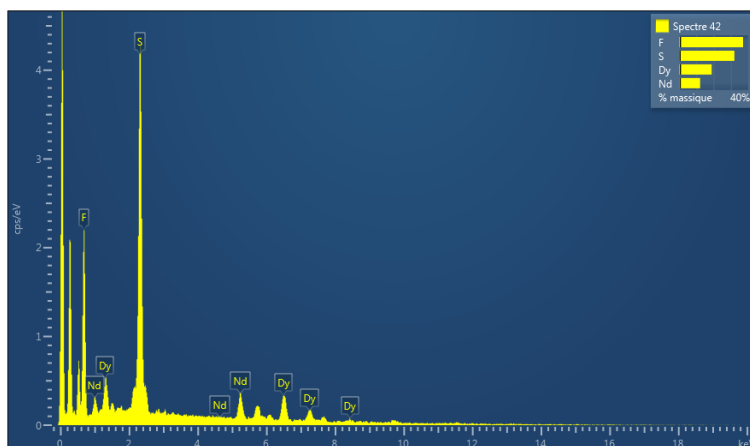

| Element                 | Type of transition | % Mass | % atomic |
|-------------------------|--------------------|--------|----------|
| F                       | K edge             | 36.99  | 61.90    |
| S                       | K edge             | 32.00  | 31.73    |
| Nd                      | L edge             | 12.16  | 2.68     |
| Dy                      | L edge             | 18.85  | 3.69     |
| Total:                  |                    | 100.00 | 100.00   |
| Nd/Dy ratio (1-x)/(1+x) |                    |        | 0.73     |

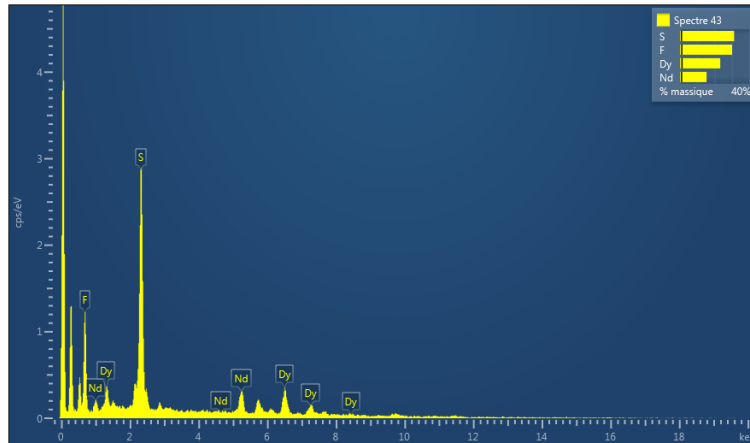

| Element                 | Type of transition | % Mass | % atomic |
|-------------------------|--------------------|--------|----------|
| F                       | K edge             | 30.11  | 56.39    |
| S                       | K edge             | 31.30  | 34.73    |
| Nd                      | L edge             | 15.33  | 3.78     |
| Dy                      | L edge             | 23.26  | 5.09     |
| Total:                  |                    | 100.00 | 100.00   |
| Nd/Dy ratio (1-x)/(1+x) |                    |        | 0.74     |

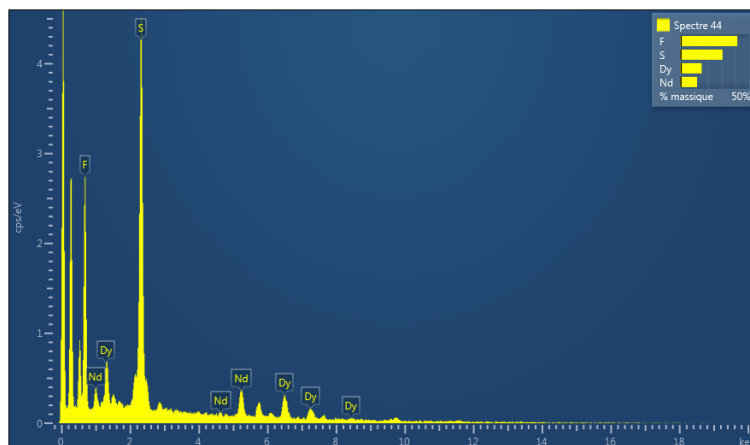

| Element                 | Type of transition | % Mass | % atomic |
|-------------------------|--------------------|--------|----------|
| F                       | K edge             | 41.44  | 65.74    |
| S                       | K edge             | 30.64  | 28.80    |
| Nd                      | L edge             | 12.31  | 2.57     |
| Dy                      | L edge             | 15.61  | 2.89     |
| Total:                  |                    | 100.00 | 100.00   |
| Nd/Dy ratio (1-x)/(1+x) |                    |        | 0.74     |

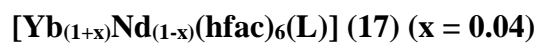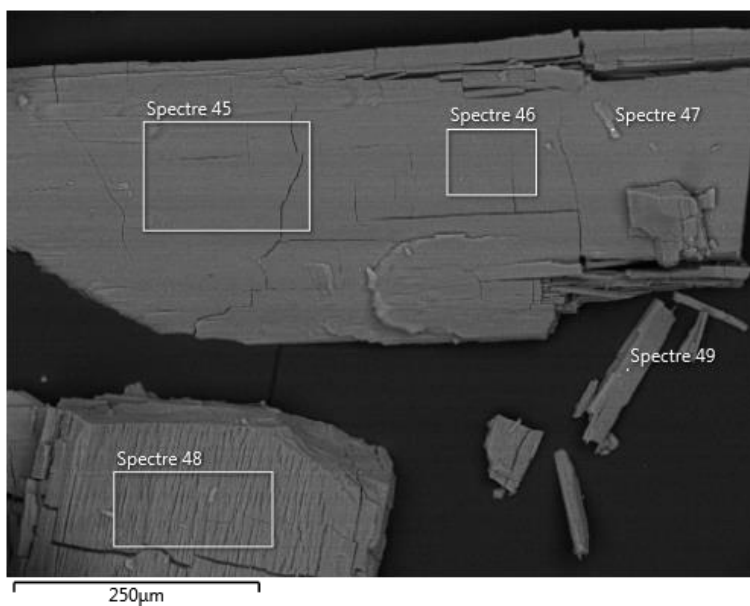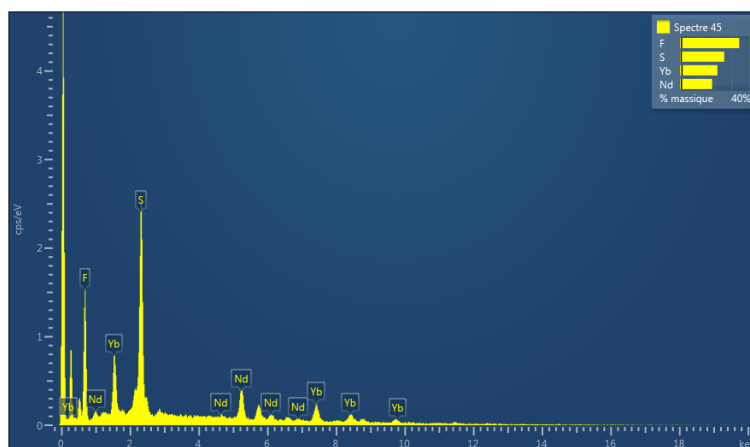

| Element                 | Type of transition | % Mass | % atomic |
|-------------------------|--------------------|--------|----------|
| F                       | K edge             | 34.27  | 63.19    |
| S                       | K edge             | 25.56  | 27.92    |
| Nd                      | L edge             | 18.54  | 4.50     |
| Yb                      | L edge             | 21.64  | 4.38     |
| Total:                  |                    | 100.00 | 100.00   |
| Nd/Yb ratio (1-x)/(1+x) |                    |        | 1.03     |

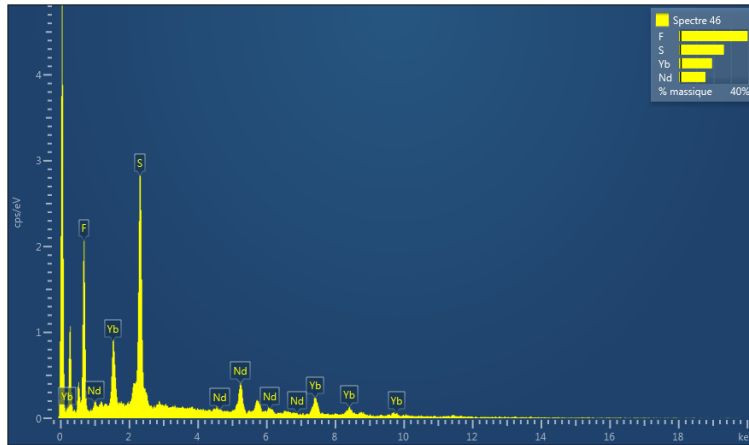

| Element                 | Type of transition | % Mass | % atomic |
|-------------------------|--------------------|--------|----------|
| F                       | K edge             | 39.66  | 67.03    |
| S                       | K edge             | 25.99  | 26.03    |
| Nd                      | L edge             | 15.26  | 3.40     |
| Yb                      | L edge             | 19.09  | 3.54     |
| Total:                  |                    | 100.00 | 100.00   |
| Nd/Yb ratio (1-x)/(1+x) |                    |        | 0.96     |

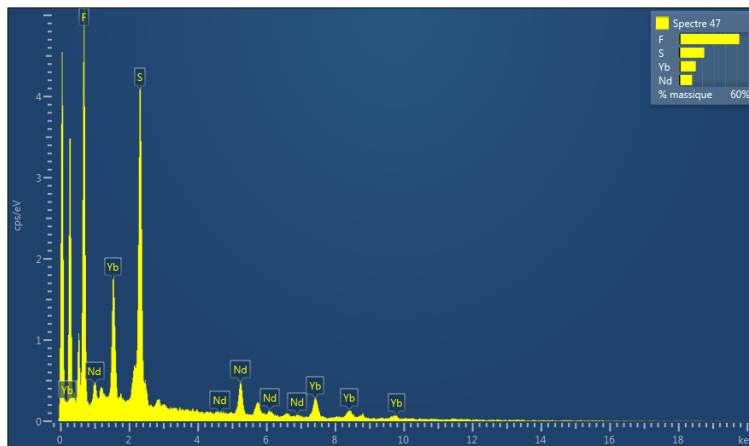

| Element                 | Type of transition | % Mass | % atomic |
|-------------------------|--------------------|--------|----------|
| F                       | K edge             | 52.26  | 76.48    |
| S                       | K edge             | 21.92  | 19.01    |
| Nd                      | L edge             | 11.35  | 2.19     |
| Yb                      | L edge             | 14.47  | 2.33     |
| Total:                  |                    | 100.00 | 100.00   |
| Nd/Yb ratio (1-x)/(1+x) |                    |        | 0.94     |

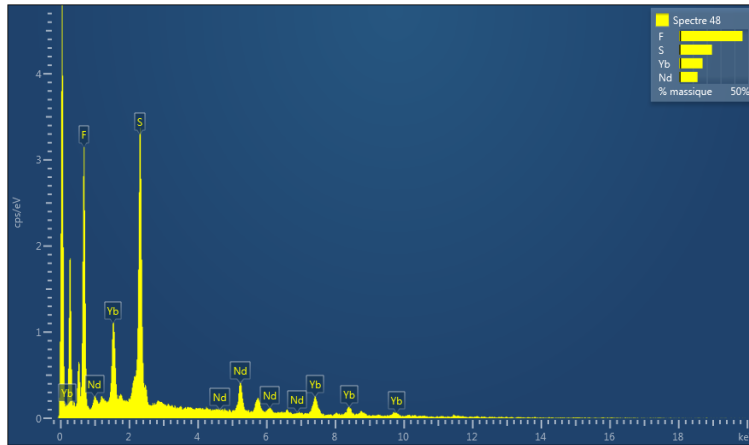

| Element                 | Type of transition | % Mass | % atomic |
|-------------------------|--------------------|--------|----------|
| F                       | K edge             | 45.87  | 72.14    |
| S                       | K edge             | 23.78  | 22.16    |
| Nd                      | L edge             | 13.36  | 2.77     |
| Yb                      | L edge             | 16.99  | 2.93     |
| Total:                  |                    | 100.00 | 100.00   |
| Nd/Yb ratio (1-x)/(1+x) |                    |        | 0.95     |

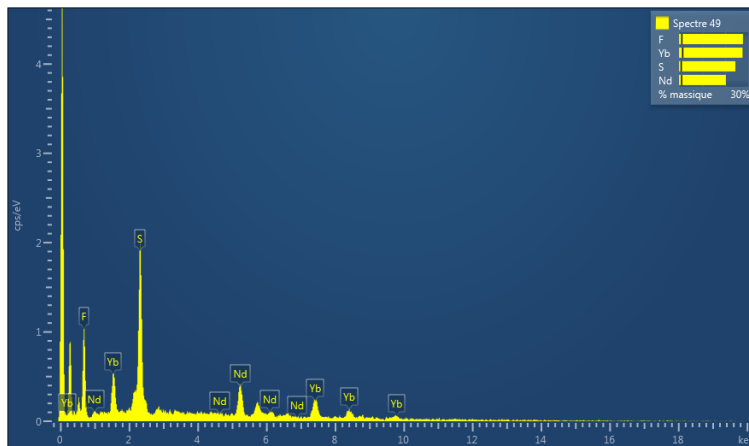

| Element                 | Type of transition | % Mass | % atomic |
|-------------------------|--------------------|--------|----------|
| F                       | K edge             | 27.71  | 57.87    |
| S                       | K edge             | 24.43  | 30.23    |
| Nd                      | L edge             | 20.32  | 5.59     |
| Yb                      | L edge             | 27.54  | 6.31     |
| Total:                  |                    | 100.00 | 100.00   |
| Nd/Yb ratio (1-x)/(1+x) |                    |        | 0.89     |

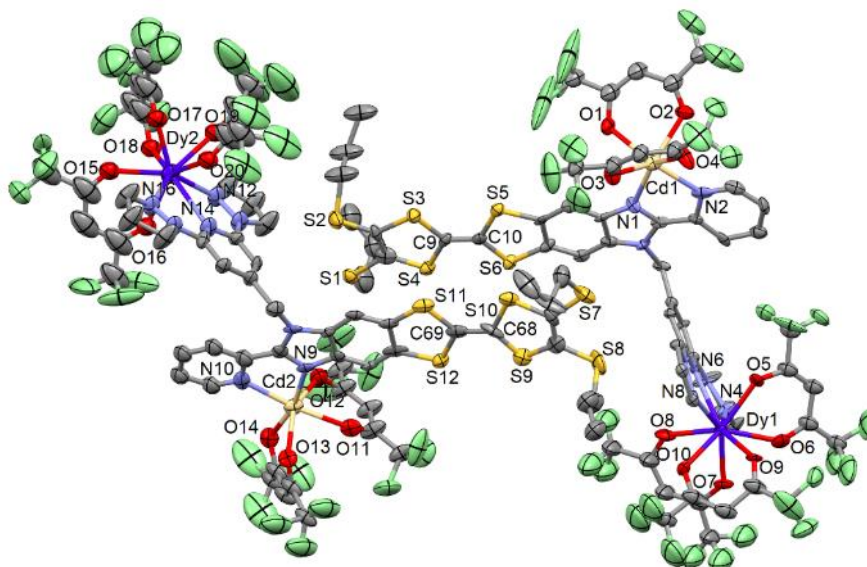

**Figure S1.** ORTEP view of **1**. Thermal ellipsoids are drawn at 30% probability. Hydrogen atoms and solvent molecules of crystallization are omitted for clarity.

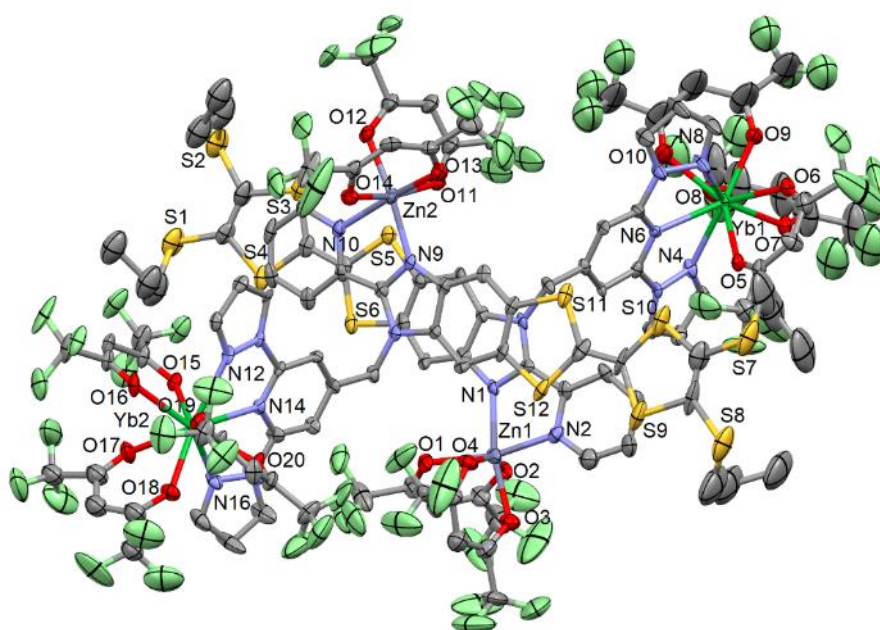

**Figure S2.** ORTEP view of **3**. Thermal ellipsoids are drawn at 30% probability. Hydrogen atoms and solvent molecules of crystallization are omitted for clarity.

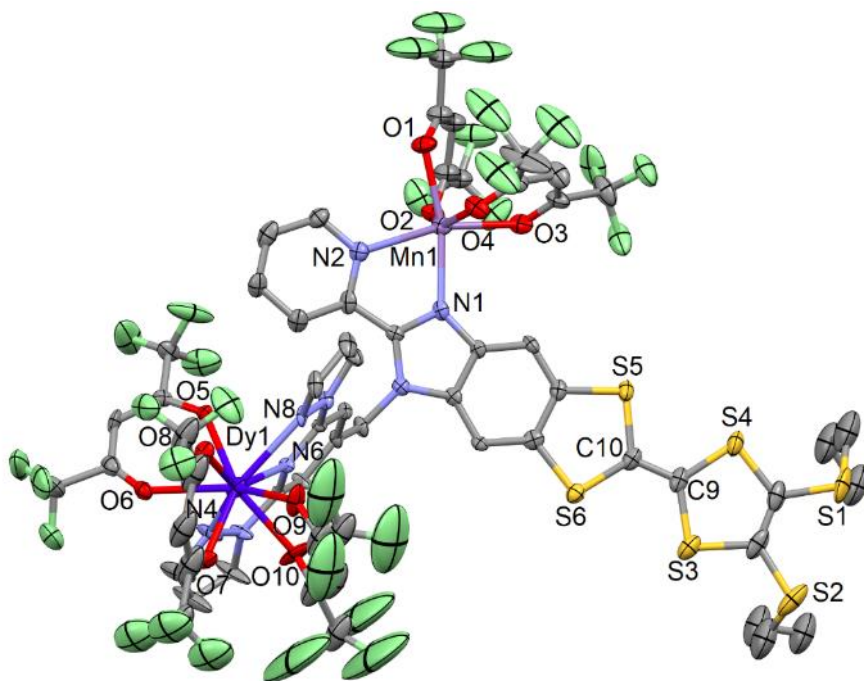

**Figure S3.** ORTEP view of **4**. Thermal ellipsoids are drawn at 30% probability. Hydrogen atoms and solvent molecules of crystallization are omitted for clarity.

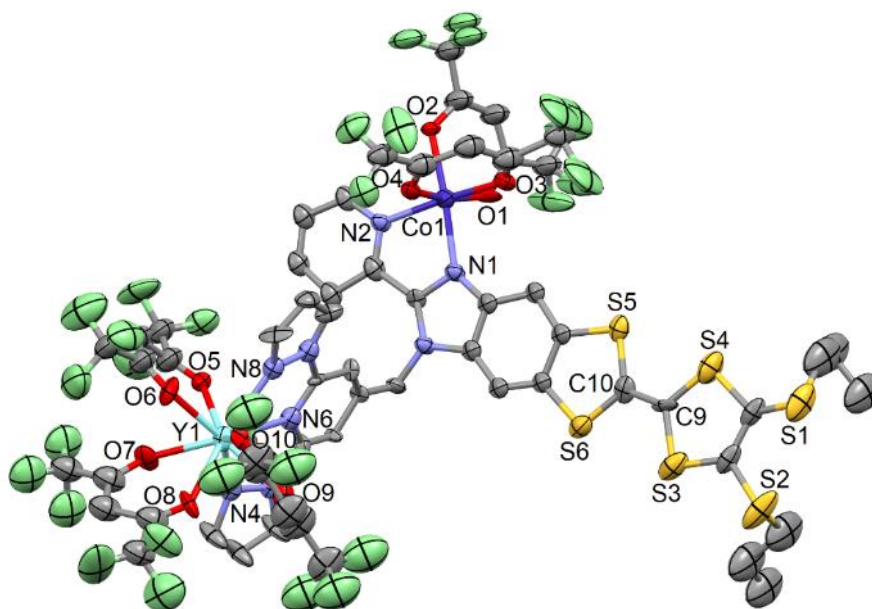

**Figure S4.** ORTEP view of **6**. Thermal ellipsoids are drawn at 30% probability. Hydrogen atoms and solvent molecules of crystallization are omitted for clarity.



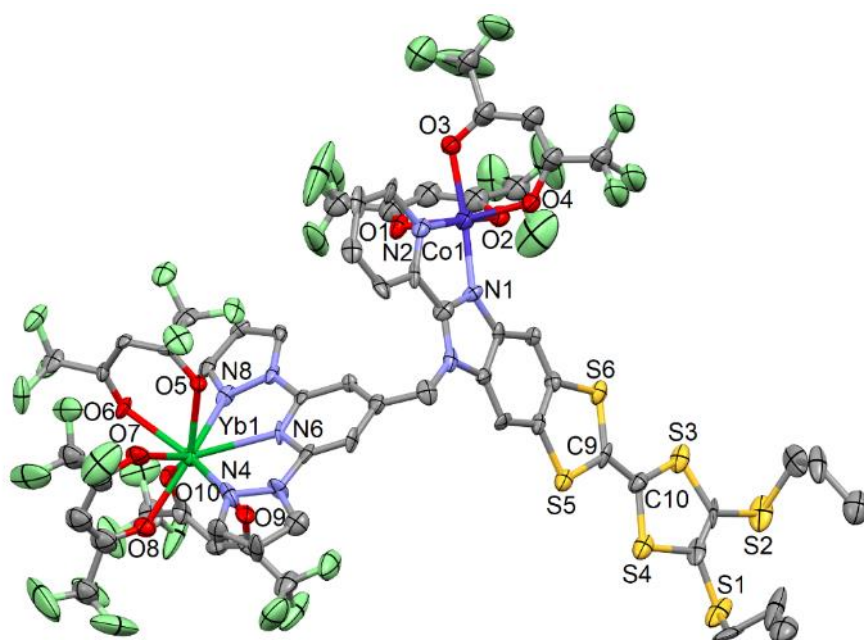

**Figure S5.** ORTEP view of **8**. Thermal ellipsoids are drawn at 30% probability. Hydrogen atoms and solvent molecules of crystallization are omitted for clarity.

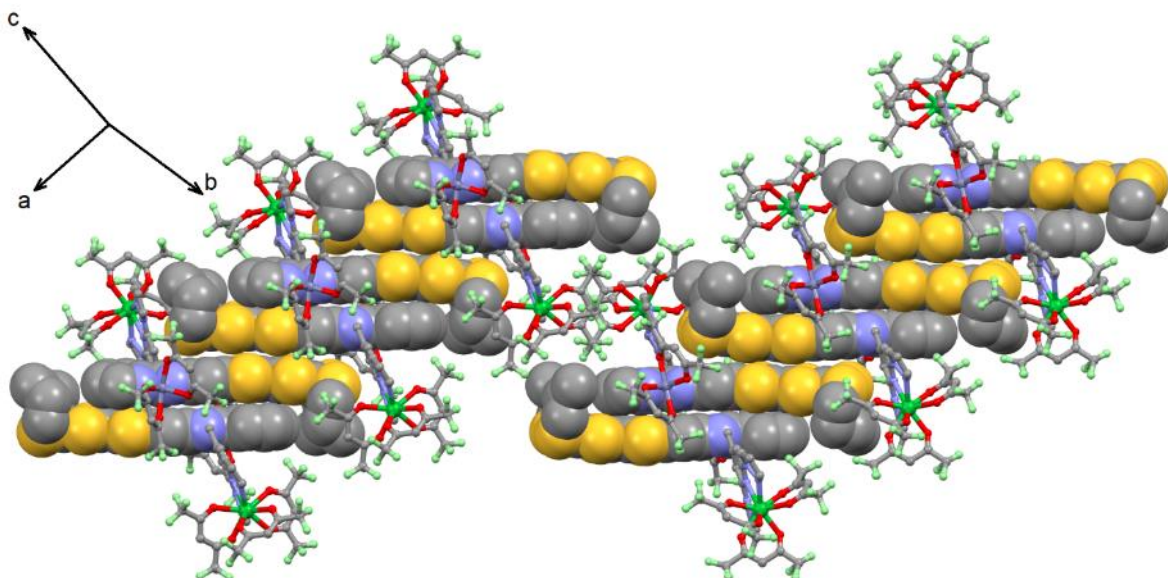

**Figure S6.** Crystal packing of **3**. The 4,5-[4,5-bis(propylthio)-tetrathiafulvalenyl]-1*H*-benzimidazol-2-yl}pyridine fragment is shown in spacefill representation while the dpp moiety and the organometallic precursors  $M(\text{hfac})_2$  and  $\text{Ln}(\text{hfac})_3$  are shown in ball and sticks representation.

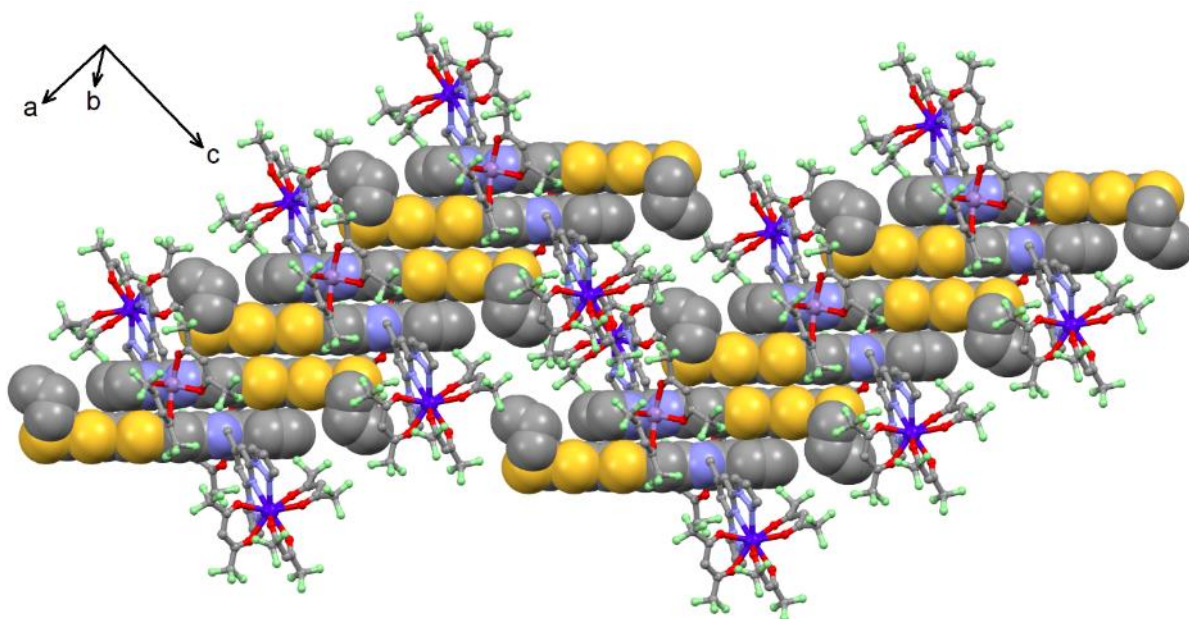

**Figure S7.** Crystal packing of **4**. The 4,5-[4,5-bis(propylthio)-tetrathiafulvalenyl]-1*H*-benzimidazol-2-yl}pyridine fragment is shown in spacefill representation while the dpp moiety and the organometallic precursors  $M(\text{hfac})_2$  and  $\text{Ln}(\text{hfac})_3$  are shown in ball and sticks representation.

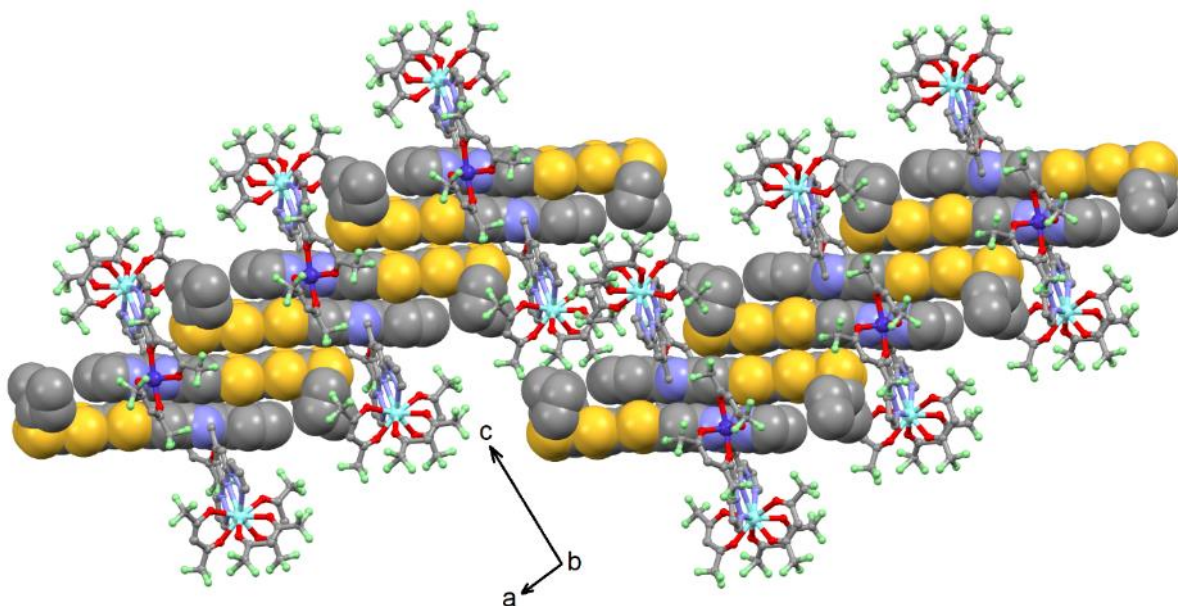

**Figure S8.** Crystal packing of **6**. The 4,5-[4,5-bis(propylthio)-tetrathiafulvalenyl]-1*H*-benzimidazol-2-yl}pyridine fragment is shown in spacefill representation while the dpp moiety and the organometallic precursors  $M(\text{hfac})_2$  and  $\text{Ln}(\text{hfac})_3$  are shown in ball and sticks representation.

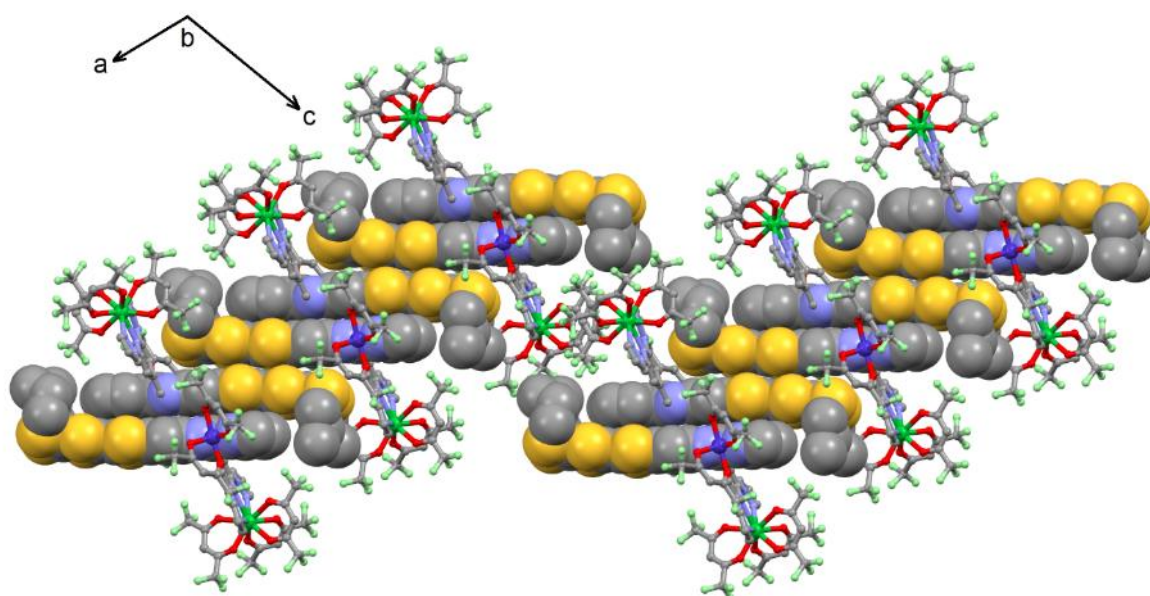

**Figure S9.** Crystal packing of **8**. The 4,5-[4,5-bis(propylthio)-tetrathiafulvalenyl]-1*H*-benzimidazol-2-yl}pyridine fragment is shown in spacefill representation while the dpp moiety and the organometallic precursors  $M(\text{hfac})_2$  and  $\text{Ln}(\text{hfac})_3$  are shown in ball and sticks representation.

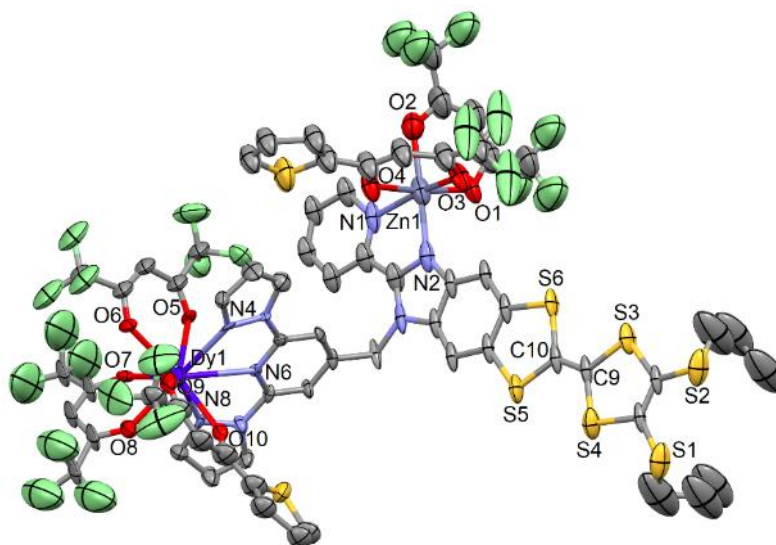

**Figure S10.** ORTEP view of **11**. Thermal ellipsoids are drawn at 30% probability. Hydrogen atoms and solvent molecules of crystallization are omitted for clarity.

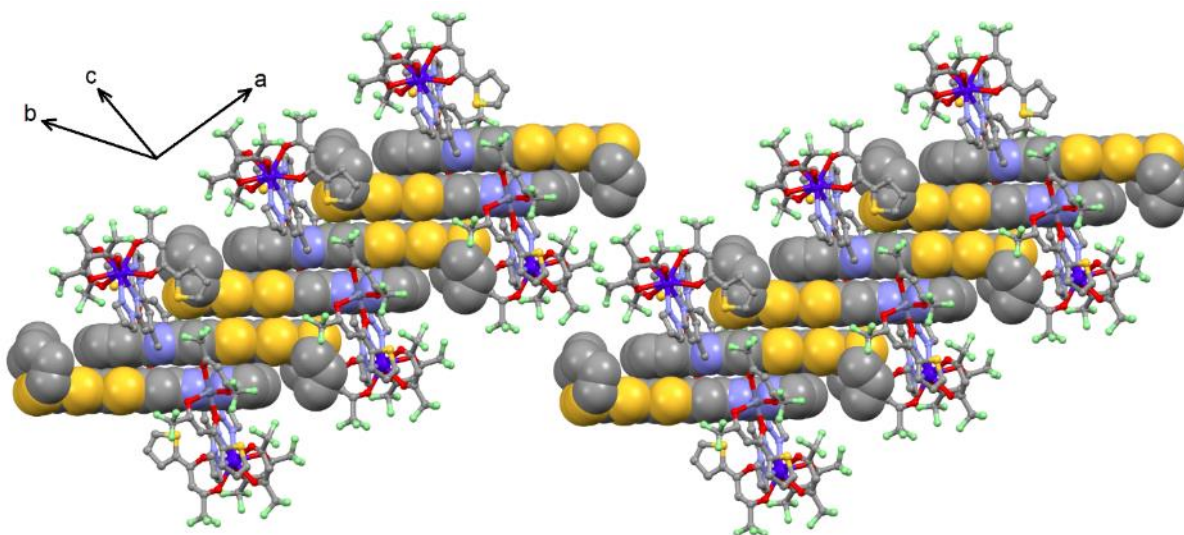

**Figure S11.** Crystal packing of **11**. The 4,5-[4,5-bis(propylthio)-tetrathiafulvalenyl]-1*H*-benzimidazol-2-yl}pyridine fragment is shown in spacefill representation while the dpp moiety and the organometallic precursors  $M(\text{hfac})_2$  and  $\text{Ln}(\text{hfac})_3$  are shown in ball and sticks representation.

The previous X-ray structures **1-10** have shown that Mn(II), Co(II), Ni(II), Zn(II) and Cd(II) can be inserted in the hetero-bimetallic complexes. The case of the insertion of a Cu(II) ion is special. In fact the coordination reaction of Cu(II) in presence of MeOH leads to the formation of a pure 3*d* complex of formula  $[\text{Cu}(\text{hfac})(\text{CH}_3\text{OH})(\text{L}')] \cdot 0.5(\text{C}_6\text{H}_{14})$  (**12**) while in the absence of alcohol the formation of the unprecedented  $[\text{Cu}(\text{H}_2\text{O})\text{Dy}(\text{hfac})_4(\text{L})] \cdot [\text{Dy}(\text{hfac})_4] \cdot (\text{CH}_2\text{Cl}_2)$  (**13**) hetero-bimetallic complex is observed (see Supporting Informations for structural descriptions and Figures S12-S15).

**$[\text{Cu}(\text{hfac})(\text{CH}_3\text{OH})(\text{L}')] \cdot 0.5(\text{C}_6\text{H}_{14})$  (**12**).** **12** crystallizes in the P-1 ( $N^{\circ}2$ ) triclinic space group (Table S1). The X-ray structure reveals that the alkylated dpp fragment is not anymore present leading to the conclusion that the combination Cu(II)/alcohol allowed a N-dealkylation reaction to give the ligand 4,5-[4,5-bis(propylthio)-tetrathiafulvalenyl]-1*H*-benzimidazol-2-yl}pyridine ( $\text{L}'$ ). Consequently only the bischelating site of coordination is available, it is occupied by the Cu(II) ion. The Cu(II) is coordinated to the N3 deprotonated amine and the N2 atom of the pyridine moiety (Figure S12). The negative charge of the N3 amine induced the loss of one  $\text{hfac}^-$  of the  $\text{Cu}(\text{hfac})_2$  precursor and the axial position is occupied by one MeOH molecule. The Cu(II) lies in a  $\text{N}_2\text{O}_3$  environment which can be described as a square pyramidal polyhedron with a long Cu1-O3 distance due to the Jahn-Teller effect.

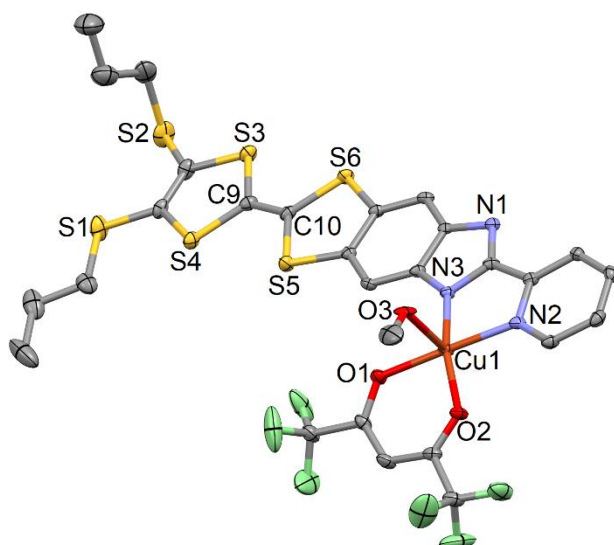

**Figure S12.** ORTEP view of **12**. Thermal ellipsoids are drawn at 30% probability. Hydrogen atoms and solvent molecules of crystallization are omitted for clarity.

The crystal packing highlights the formation of columns along the *a* axis composed of head-to-tail dimers (D-A dimers) and Acceptor-Acceptor (A-A) dimers (where A is the bzip fragment) (Figure S13). The D-A dimers are favored due to  $\pi$ - $\pi$  interactions and the Cu1...S6 contacts in axial position while the A-A dimers are favored thanks to H-bonds between the coordinated MeOH and the imine of the imidazole fragment (N3...O3 = 2.784 Å).

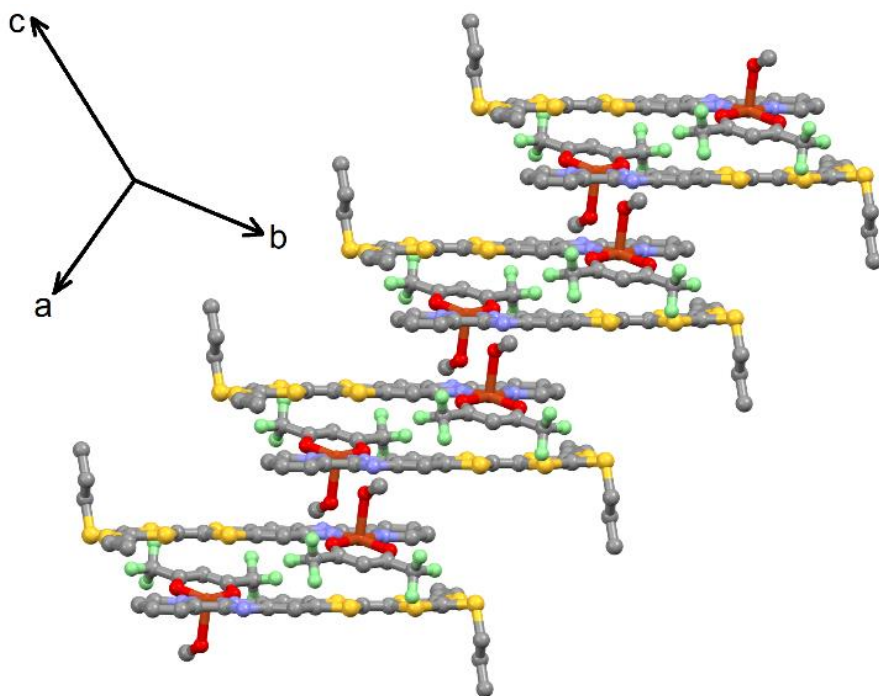

**Figure S13.** Crystal packing of **12** highlighting the formation of the columns along the *a* axis. In the crystal, the columns interact through the S1...S4 contacts (3.838 Å).

**[Cu(H<sub>2</sub>O)Dy(hfac)<sub>4</sub>(L)]·[Dy(hfac)<sub>4</sub>]<sup>-</sup>·(CH<sub>2</sub>Cl<sub>2</sub>) (13).** **13** crystallizes in the P-1 (N<sup>o</sup>2) triclinic space group (Table S1). The asymmetric unit is composed of one [Cu(H<sub>2</sub>O)Dy(hfac)<sub>4</sub>(L)]<sup>+</sup> cation, one [Dy(hfac)<sub>4</sub>]<sup>-</sup> anion and one dichloromethane molecule of crystallization (Figure S14). The X-ray structure reveals that the dpp coordination site is occupied by the Dy(hfac)<sub>3</sub> precursor as expected. Nevertheless, it also revealed that the Cu(II) remains in an N<sub>2</sub>O<sub>3</sub> square pyramidal environment even if the integrity of **L** is conserved. The axial position is now occupied by a water molecule instead of a MeOH molecule. Since such geometry leads to the loss of one hfac<sup>-</sup> anion to allow the coordination of the Cu(II) to the bischelating bzip coordination site and the Cu(II) is now coordinated to the imine nitrogen atoms of the imidazole (N1) and pyridine (N2) moieties, consequently the [Cu(H<sub>2</sub>O)Dy(hfac)<sub>4</sub>(L)]<sup>+</sup> fragment is cationic and so a [Dy(hfac)<sub>4</sub>]<sup>-</sup> anion is formed to preserve the electro-neutrality of the complex.

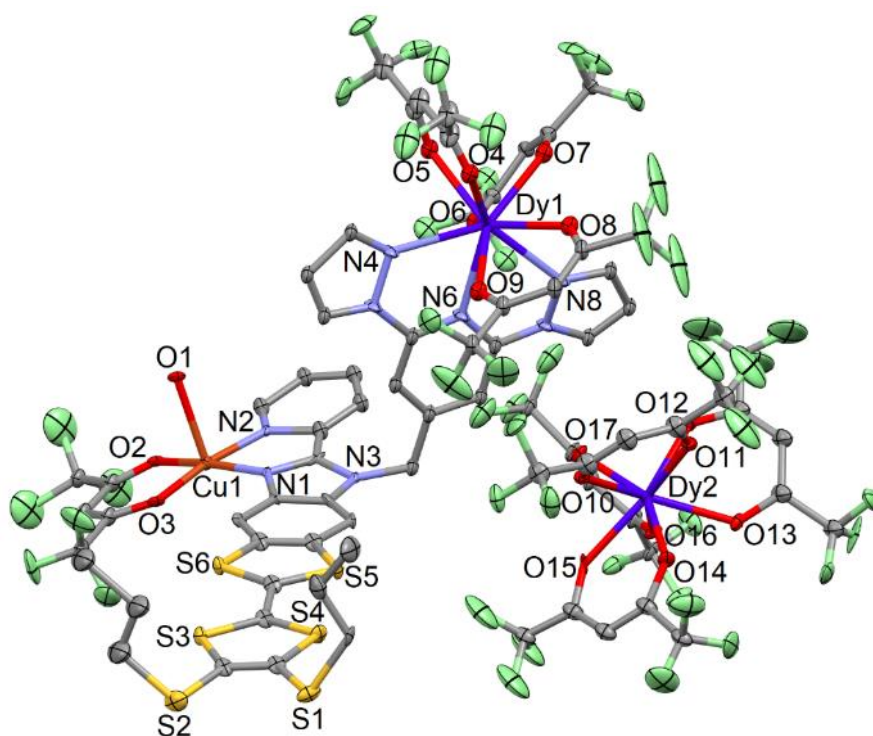

**Figure S14.** ORTEP view of **13**. Thermal ellipsoids are drawn at 30% probability. Hydrogen atoms and solvent molecules of crystallization are omitted for clarity.

The [Dy(hfac)<sub>4</sub>]<sup>-</sup> anion strongly interacts with the axial water molecule with two identified H-bonds (O1...O13 = 2.780 Å and O1...O16 = 3.007 Å). Such proximity leads to a short intermolecular distance between Cu1 and Dy2 (6.001(4) Å) compared to the M-Ln intermolecular distances observed in the other compounds (Table S4). The  $\alpha$  angle is also

affected by the presence of the  $[\text{Dy}(\text{hfac})_4]^-$  anion with an almost orthogonality between the dpp and bzip fragments ( $\alpha = 84.6(4)^\circ$ ) (Table S6).

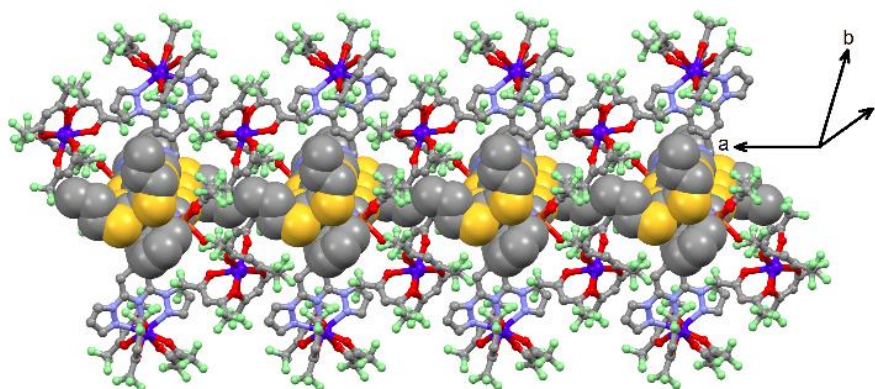

**Figure S15.** Crystal packing of **13**. The 4,5-[4,5-bis(propylthio)-tetrathiafulvalenyl]-1*H*-benzimidazol-2-yl}pyridine fragment is shown in spacefill representation while the dpp moiety, organometallic precursors  $\text{Cu}(\text{hfac})(\text{H}_2\text{O})$  and  $\text{Dy}(\text{hfac})_3$ , and  $[\text{Dy}(\text{hfac})_4]^-$  anion are shown in ball and sticks representation.

The crystal packing is also drastically changed with the formation of isolated head-to-tail dimers along the *a* axis and no  $\text{S}\cdots\text{S}$  contacts are observed (Figure S15).

The shortest intramolecular Cu-Dy and intermolecular Dy-Dy are in the same range of distances than for compounds **1-11** (Table S4).

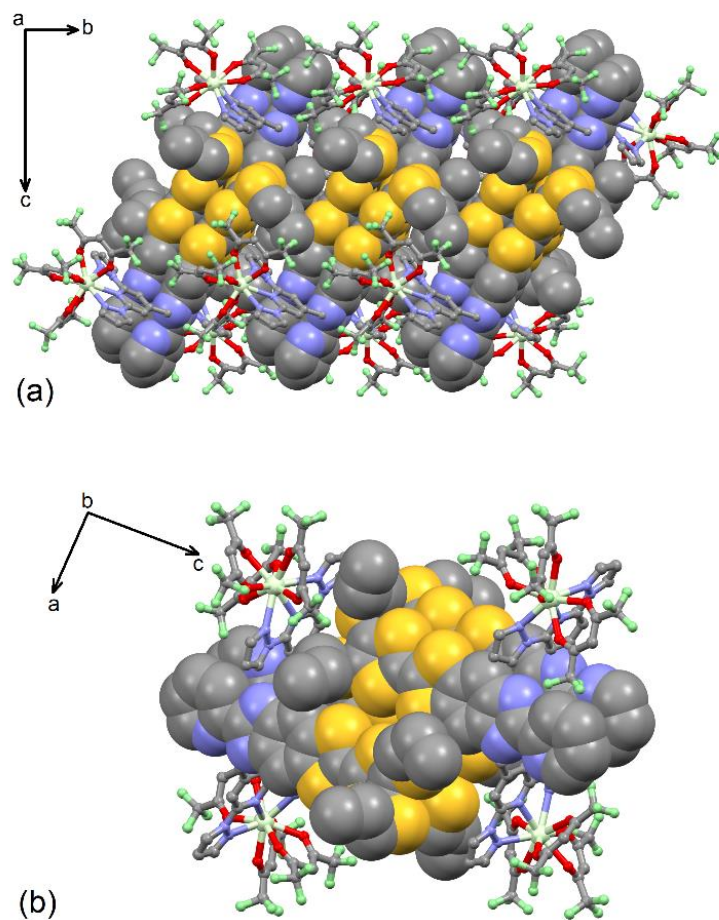

**Figure S16.** Crystal packing of **14**. The 4,5-[4,5-bis(propylthio)-tetrathiafulvalenyl]-1*H*-benzimidazol-2-yl}pyridine fragment is shown in spacefill representation while the dpp moiety and the organometallic precursors Pr(hfac)<sub>3</sub> are shown in ball and sticks representation.



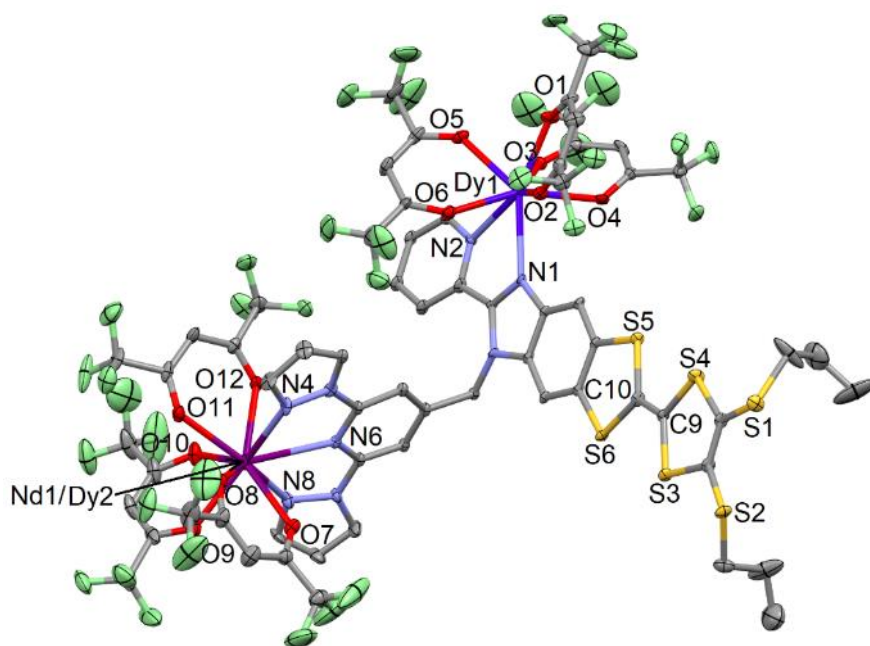

**Figure S17.** ORTEP view of **15**. Thermal ellipsoids are drawn at 30% probability. Hydrogen atoms and solvent molecules of crystallization are omitted for clarity.

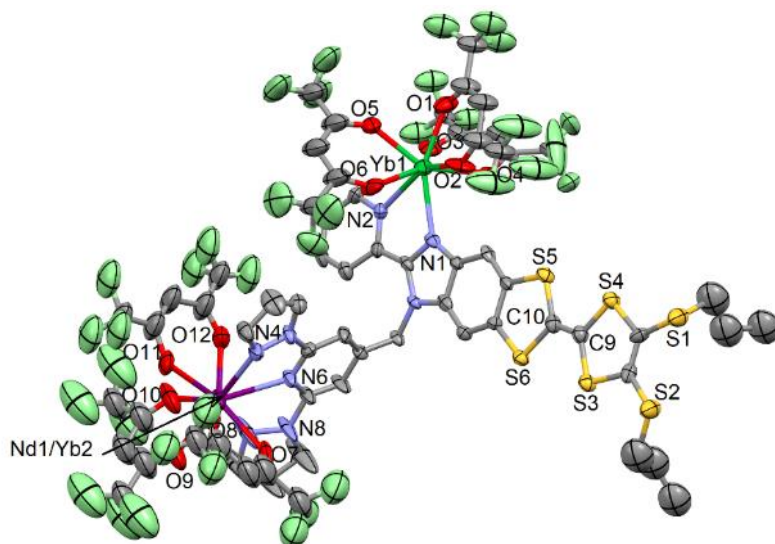

**Figure S18.** ORTEP view of **17**. Thermal ellipsoids are drawn at 30% probability. Hydrogen atoms and solvent molecules of crystallization are omitted for clarity.

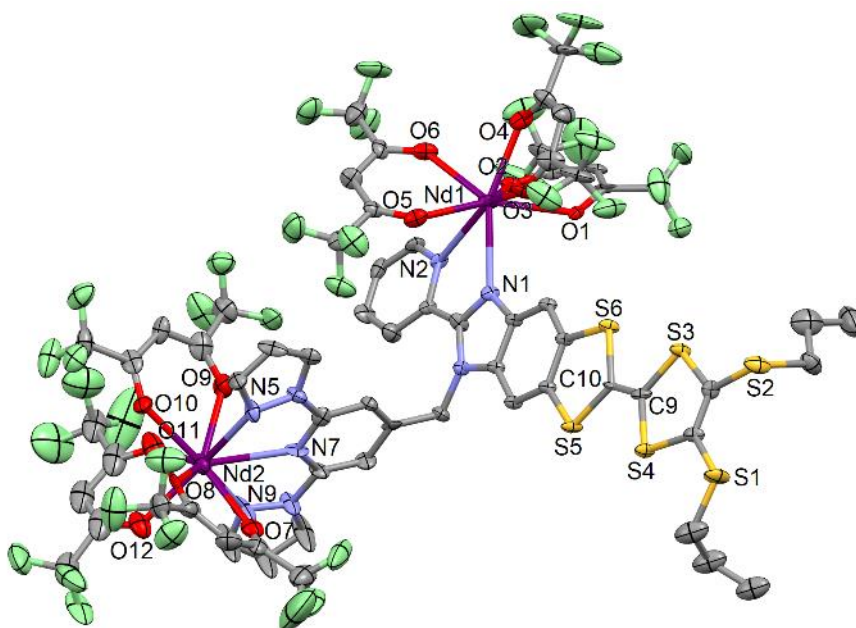

**Figure S19.** ORTEP view of **18**. Thermal ellipsoids are drawn at 30% probability. Hydrogen atoms and solvent molecules of crystallization are omitted for clarity.

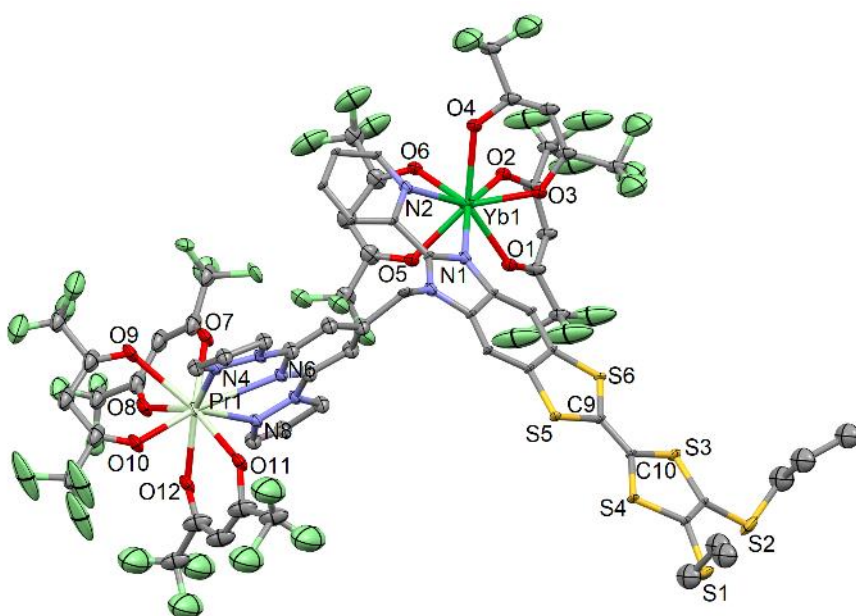

**Figure S20.** ORTEP view of **19**. Thermal ellipsoids are drawn at 30% probability. Hydrogen atoms and solvent molecules of crystallization are omitted for clarity.

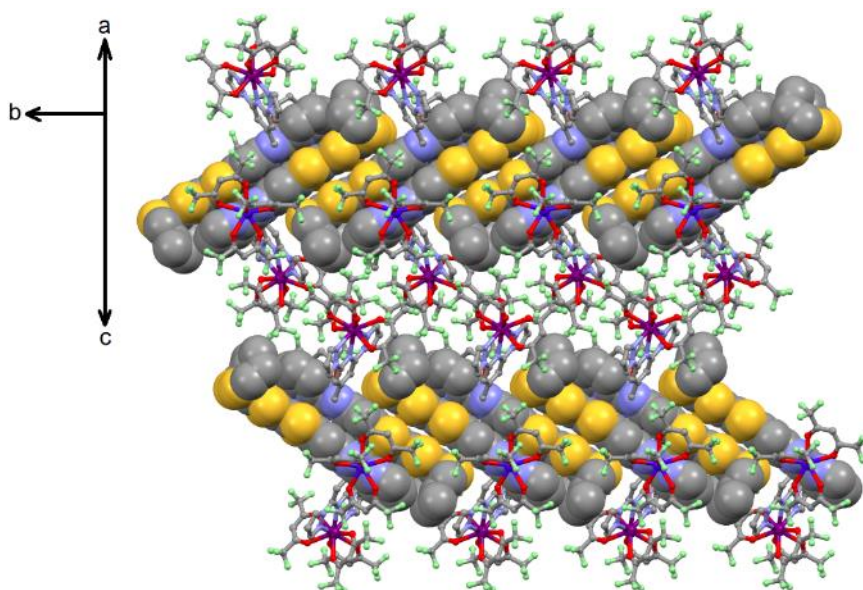

**Figure S21.** Representative crystal packing for compounds **15** and **17-19**. The 4,5-[4,5-bis(propylthio)-tetrathiafulvalenyl]-1*H*-benzimidazol-2-yl}pyridine fragment is shown in spacefill representation while the dpp moiety and the organometallic precursors Ln(hfac)<sub>3</sub> are shown in ball and sticks representation.

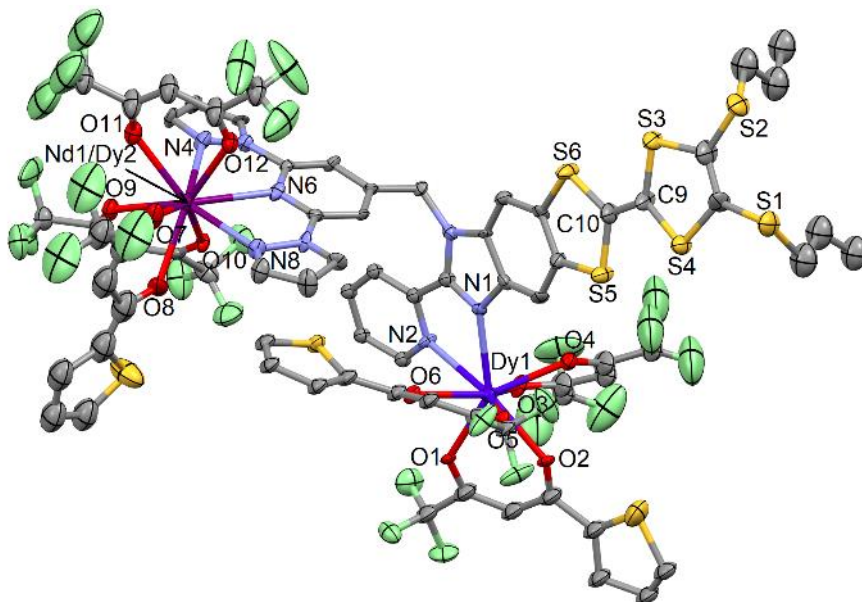

**Figure S22.** ORTEP view of **16**. Thermal ellipsoids are drawn at 30% probability. Hydrogen atoms and solvent molecules of crystallization are omitted for clarity.

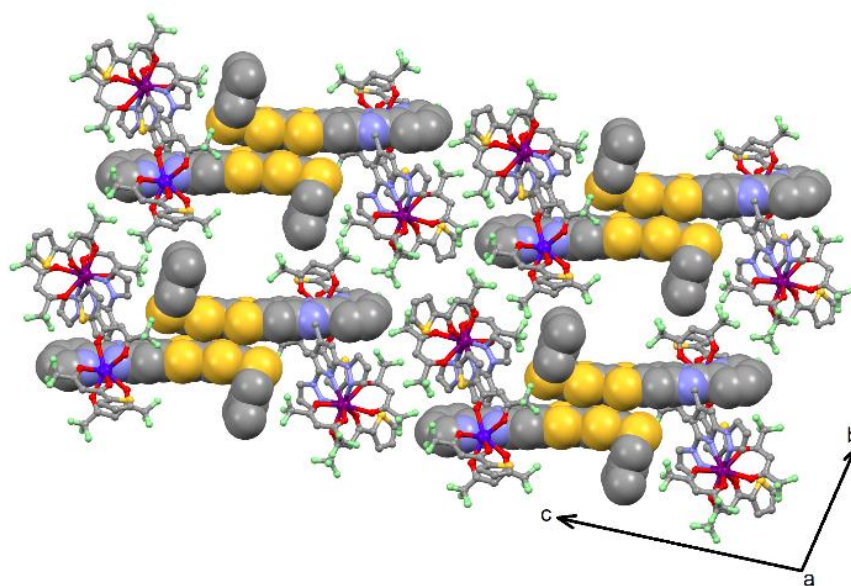

**Figure S23.** Crystal packing of **16**. The 4,5-[4,5-bis(propylthio)-tetrathiafulvalenyl]-1*H*-benzimidazol-2-yl}pyridine fragment is shown in spacefill representation while the dpp moiety and organometallic precursors Ln(hfac)<sub>3</sub> are shown in ball and sticks representation.

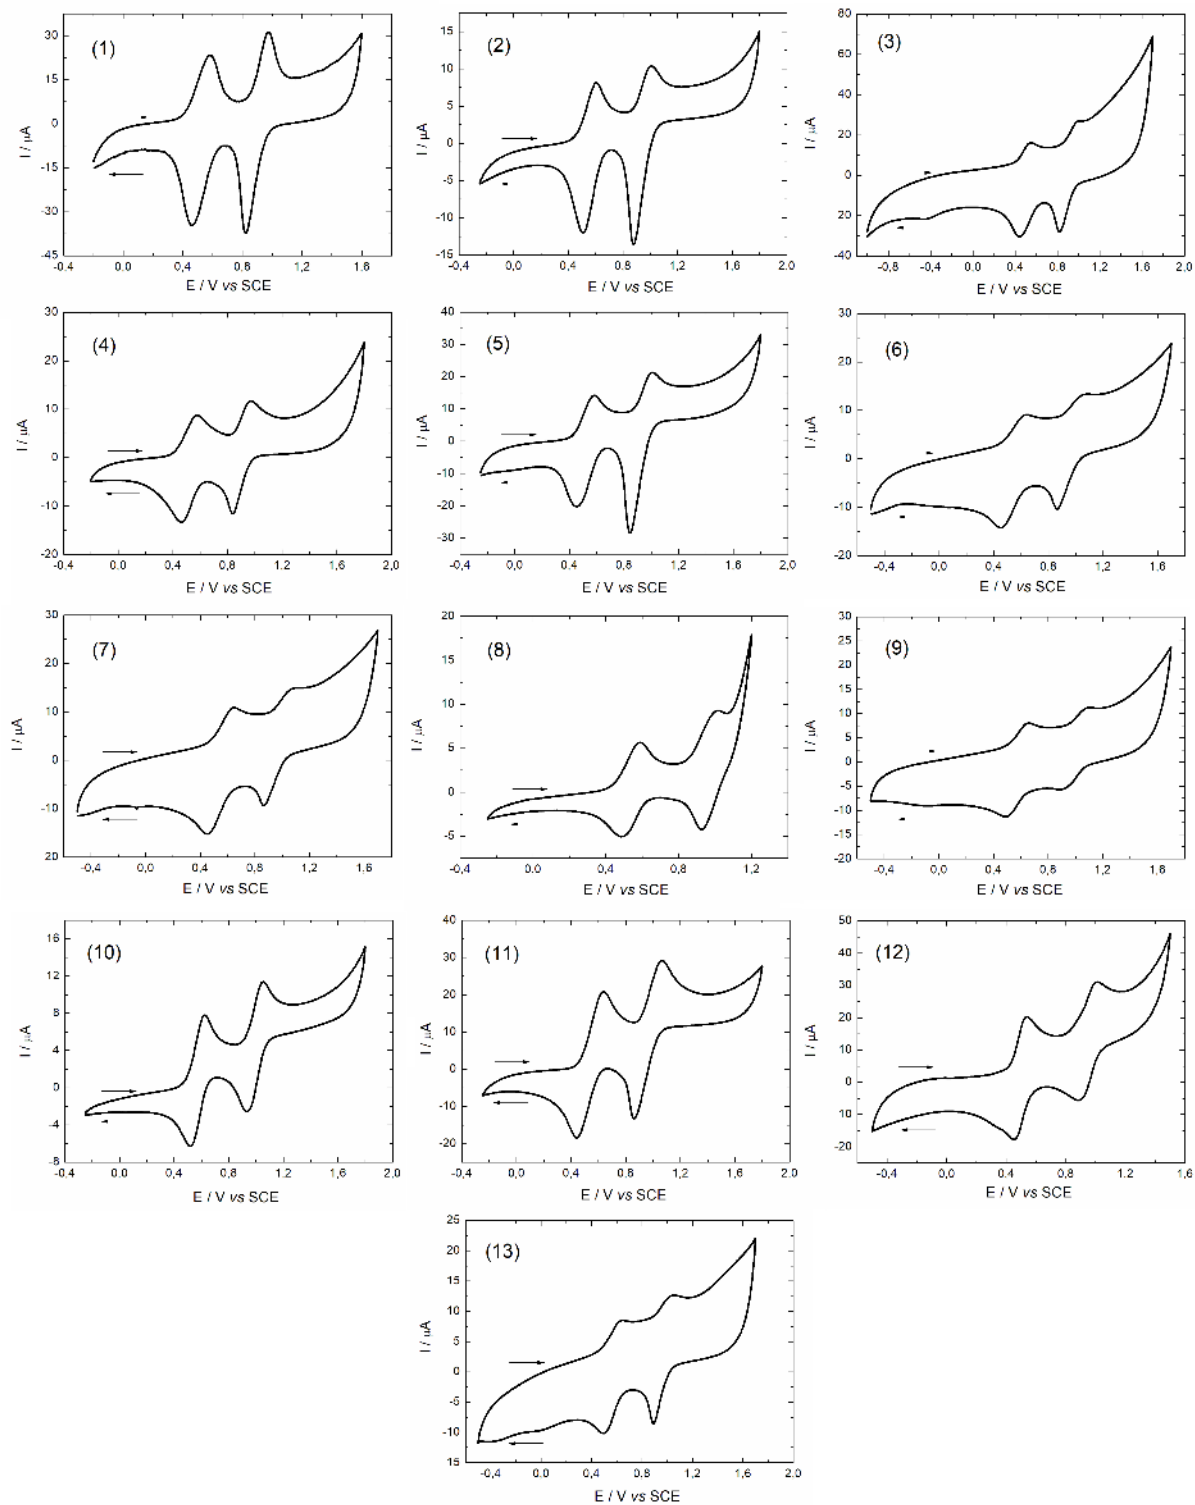

**Figure S24.** Cyclic voltammograms of **1-13** in  $\text{CH}_2\text{Cl}_2$  at a scan rate of  $100 \text{ mV}\cdot\text{s}^{-1}$ . The potentials were measured vs. a saturated calomel electrode (SCE) with Pt wires as working and counter electrodes.

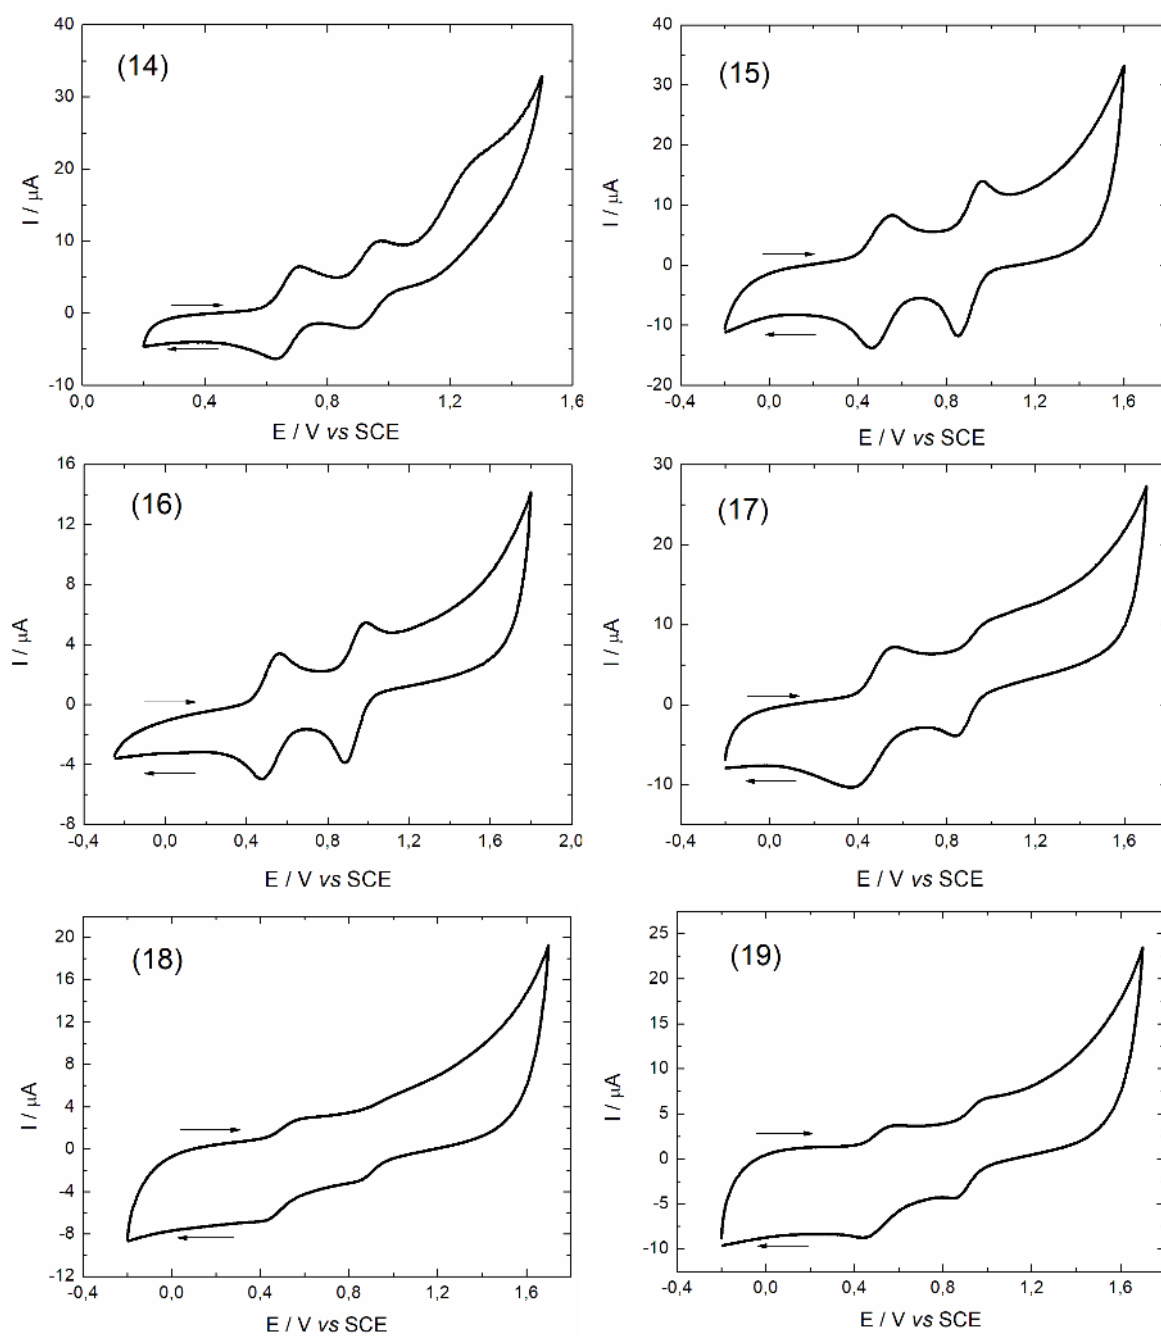

**Figure S25.** Cyclic voltammograms of **14-19** in  $\text{CH}_2\text{Cl}_2$  at a scan rate of  $100 \text{ mV}\cdot\text{s}^{-1}$ . The potentials were measured vs. a saturated calomel electrode (SCE) with Pt wires as working and counter electrodes.

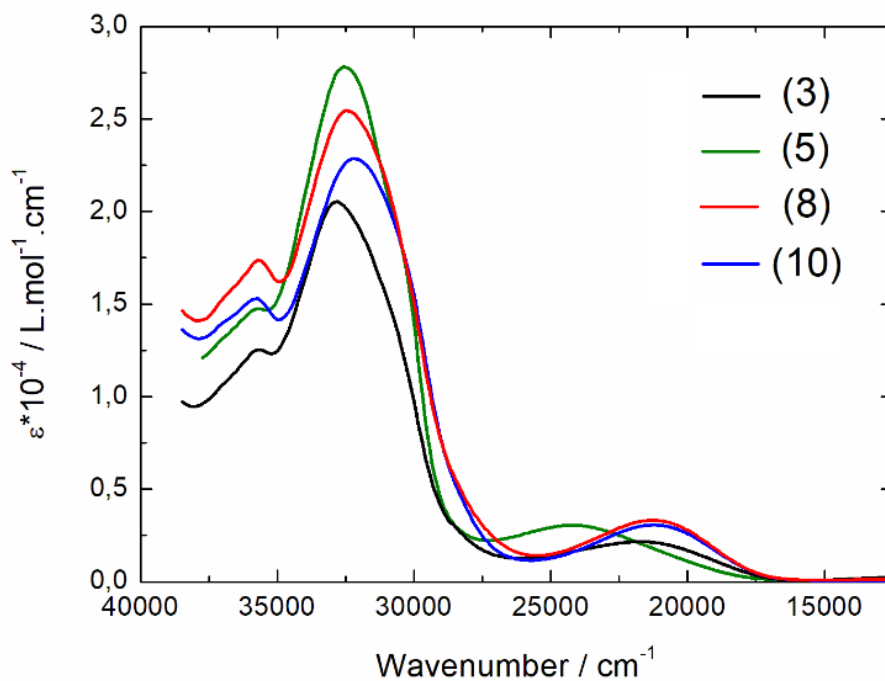

**Figure S26.** Experimental UV-vis absorption spectra of compounds **3**, **5**, **8** and **10** in CH<sub>2</sub>Cl<sub>2</sub> solution.

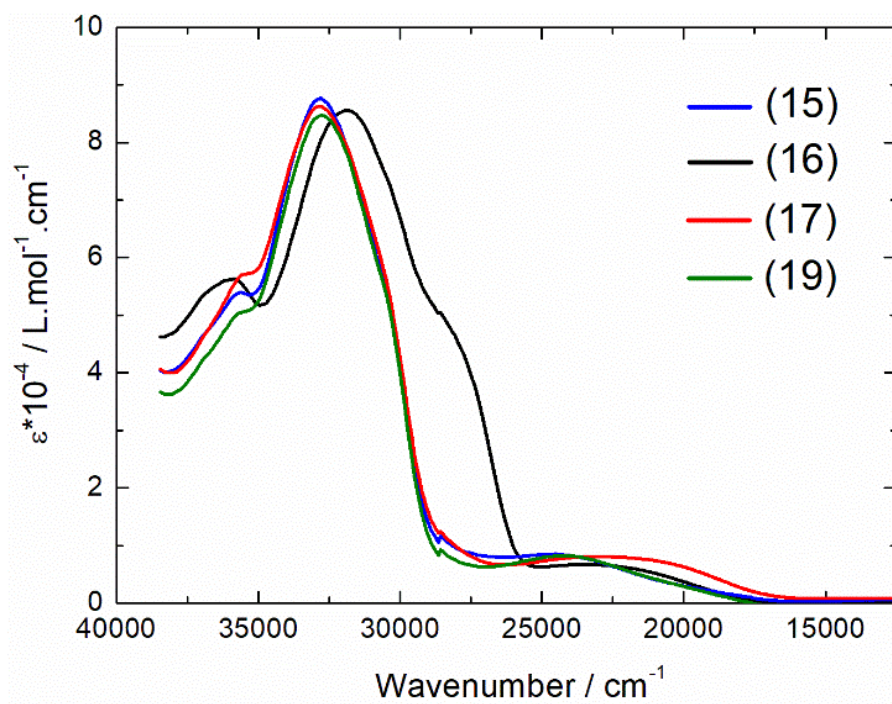

**Figure S27.** Experimental UV-vis absorption spectra of compounds **15-17** and **19** in CH<sub>2</sub>Cl<sub>2</sub> solution.

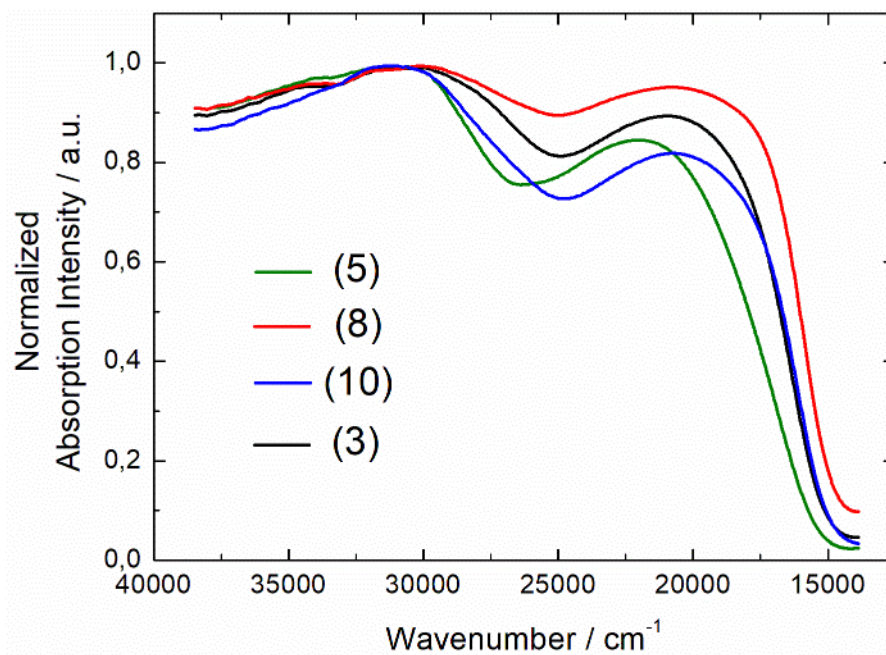

**Figure S28.** Experimental UV-vis absorption spectra in solid-state of compounds **3**, **5**, **8** and **10** in KBr pellets.

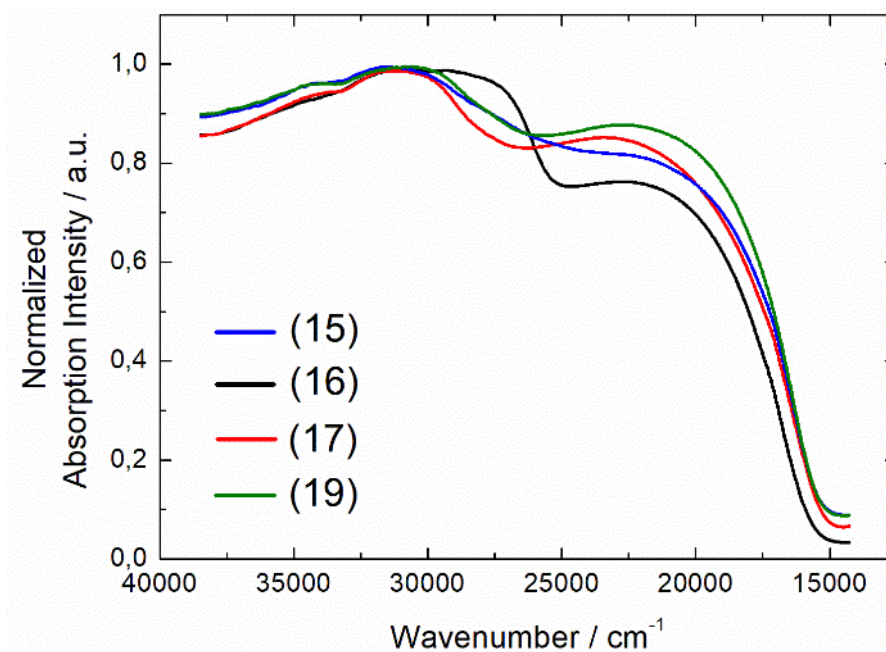

**Figure S29.** Experimental UV-vis absorption spectra in solid-state of compounds **15-17** and **19** in KBr pellets.



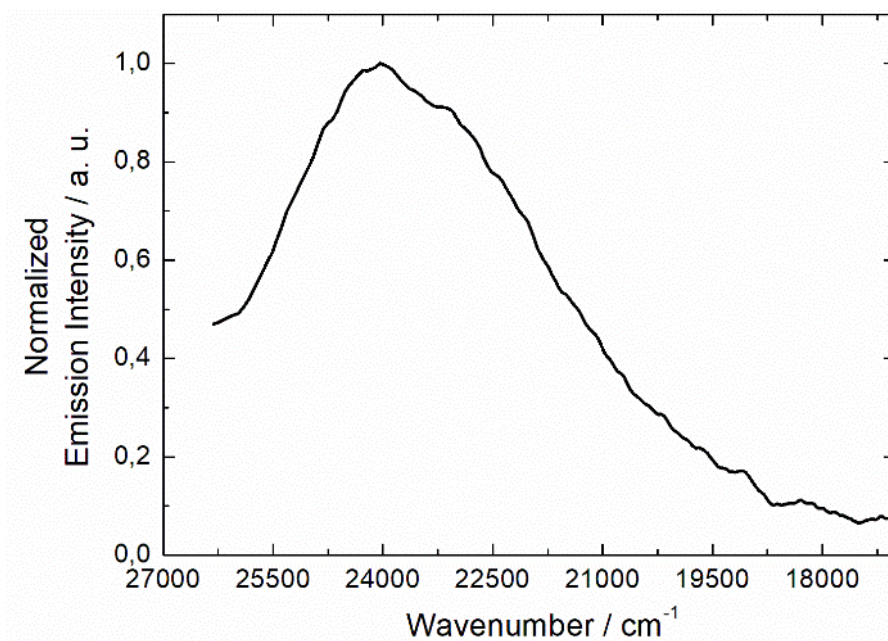

**Figure S30.** Visible ( $\lambda_{\text{ex}} = 350$  nm) luminescence spectra of **3** in the solid state at room temperature.

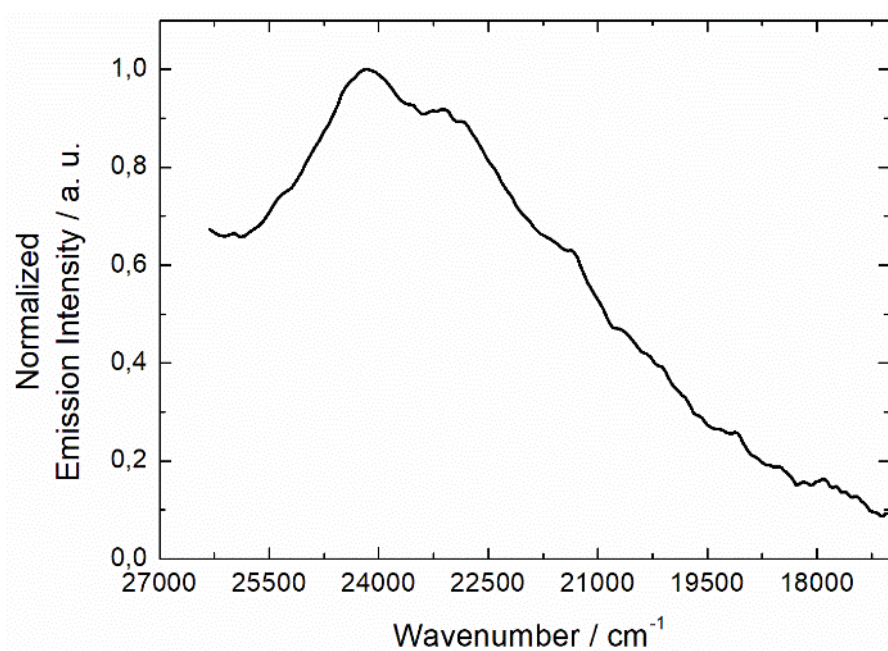

**Figure S31.** Visible ( $\lambda_{\text{ex}} = 350$  nm) luminescence spectra of **5** in the solid state at room temperature.

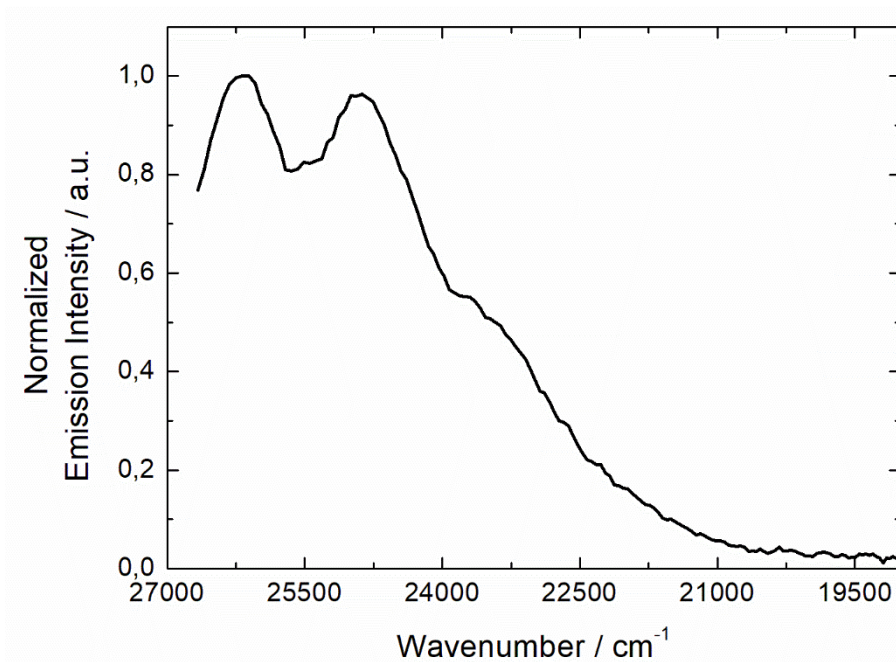

**Figure S32.** Visible ( $\lambda_{\text{ex}} = 350$  nm) luminescence spectra of **8** in the solid state at room temperature.

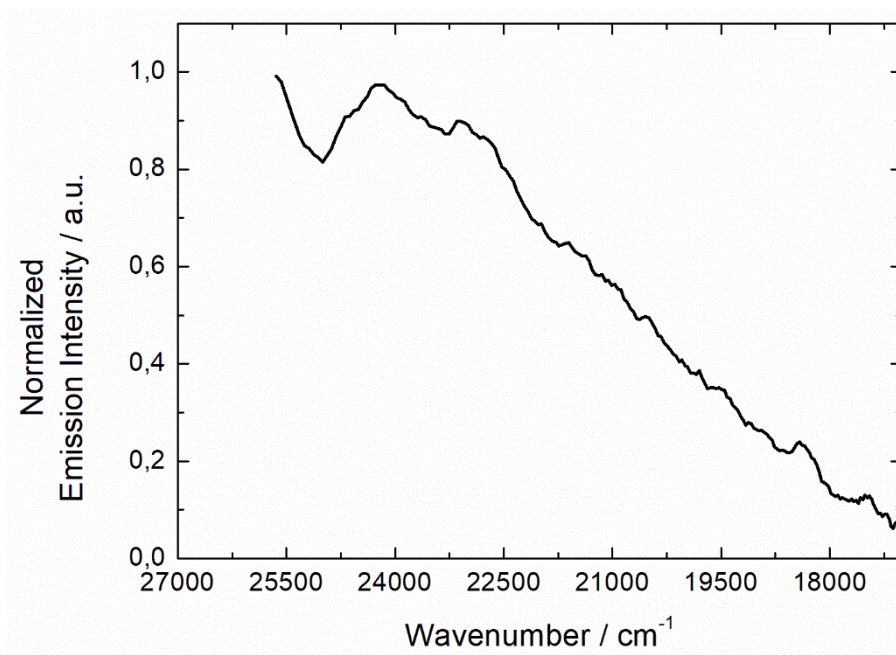

**Figure S33.** Visible ( $\lambda_{\text{ex}} = 350$  nm) luminescence spectra of **10** in the solid state at room temperature.

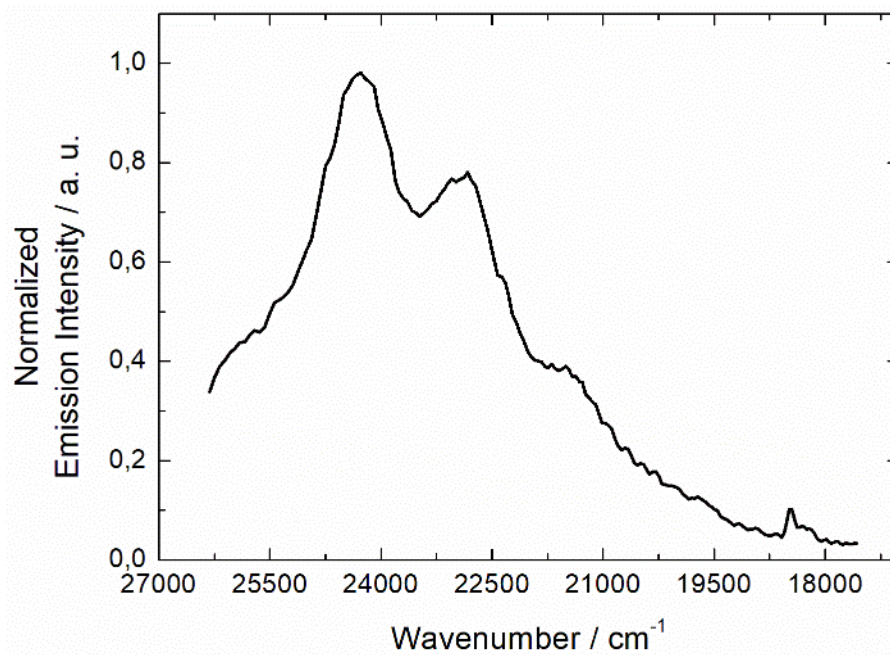

**Figure S34.** Visible ( $\lambda_{\text{ex}} = 350$  nm) luminescence spectra of **3** in the solid state at 77 K.

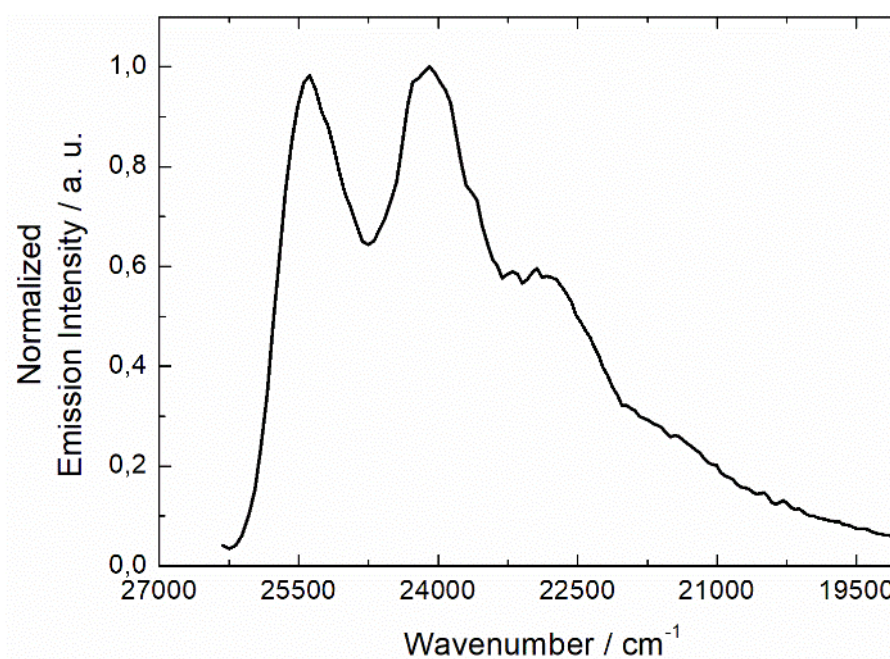

**Figure S35.** Visible ( $\lambda_{\text{ex}} = 350$  nm) luminescence spectra of **5** in the solid state at 77 K.

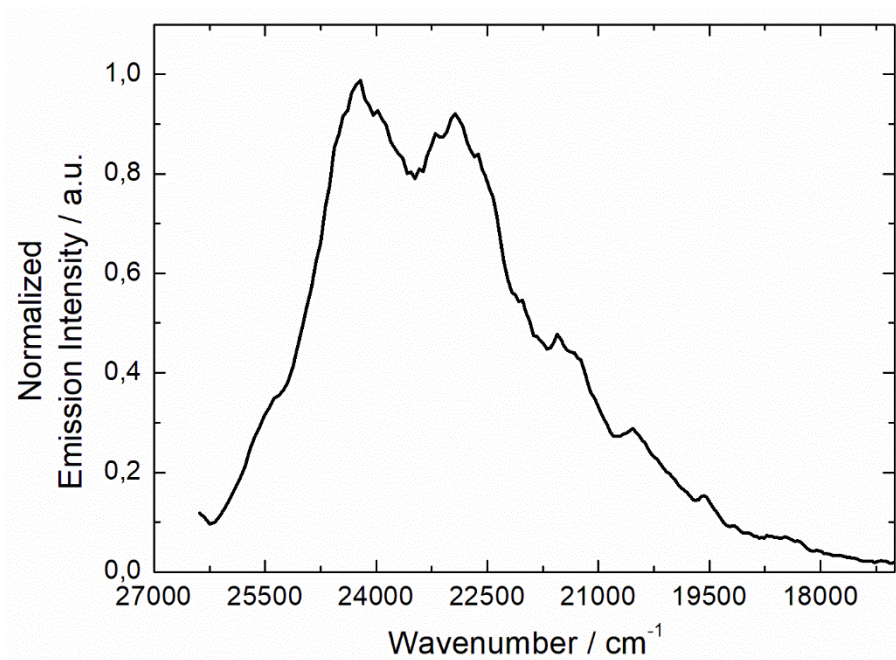

**Figure S36.** Visible ( $\lambda_{\text{ex}} = 350 \text{ nm}$ ) luminescence spectra of **8** in the solid state at 77 K.

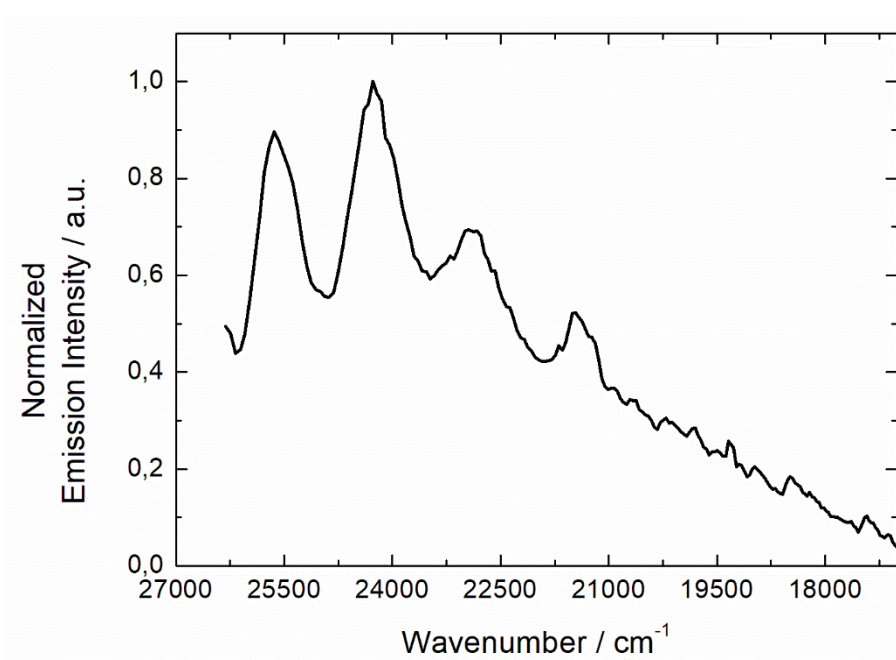

**Figure S37.** Visible ( $\lambda_{\text{ex}} = 350 \text{ nm}$ ) luminescence spectra of **10** in the solid state at 77 K.

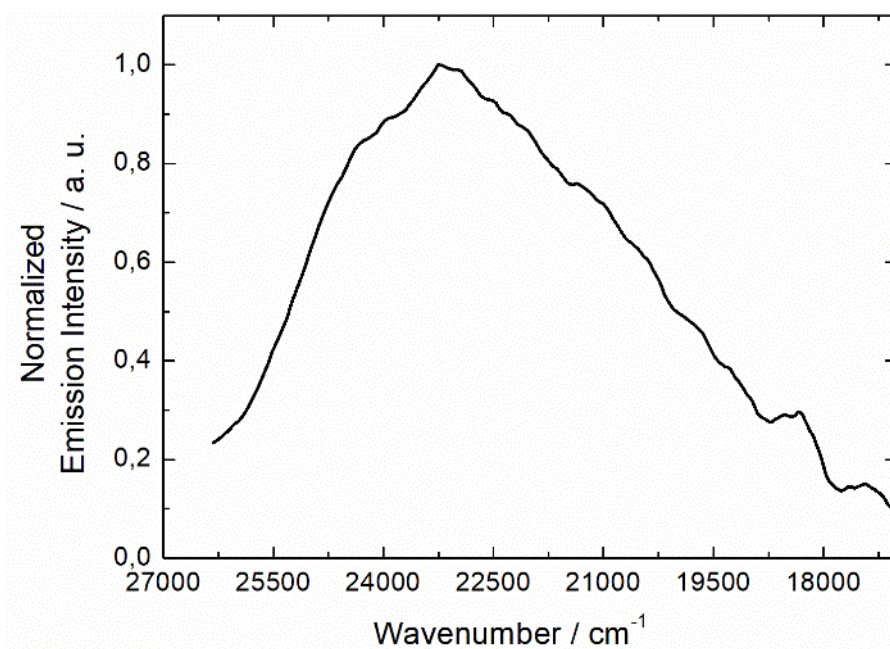

**Figure S38.** Visible ( $\lambda_{\text{ex}} = 350 \text{ nm}$ ) luminescence spectra of **15** in the solid state at room temperature.

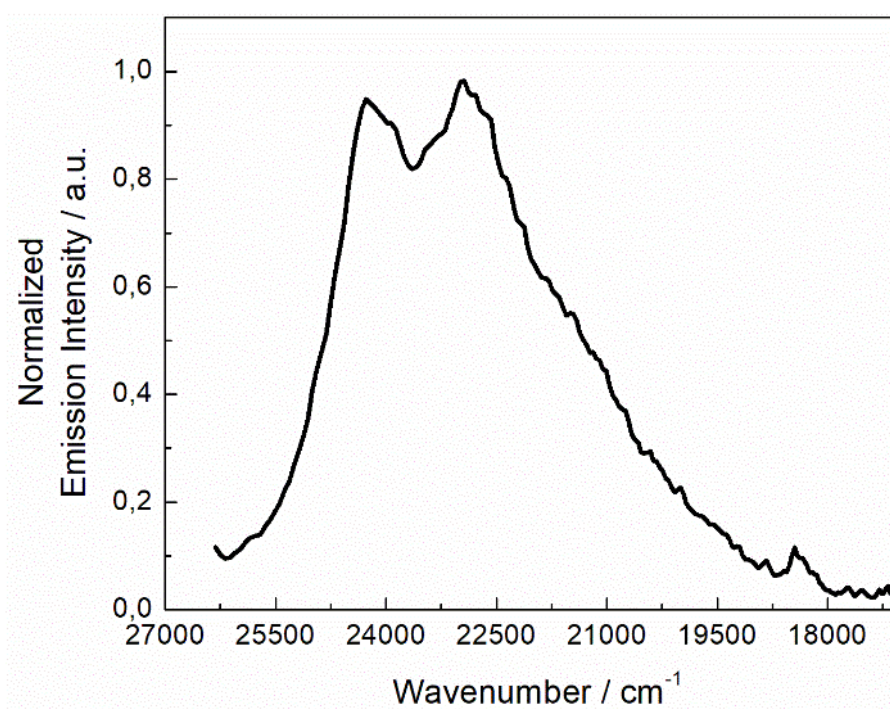

**Figure S39.** Visible ( $\lambda_{\text{ex}} = 350 \text{ nm}$ ) luminescence spectra of **17** in the solid state at room temperature.

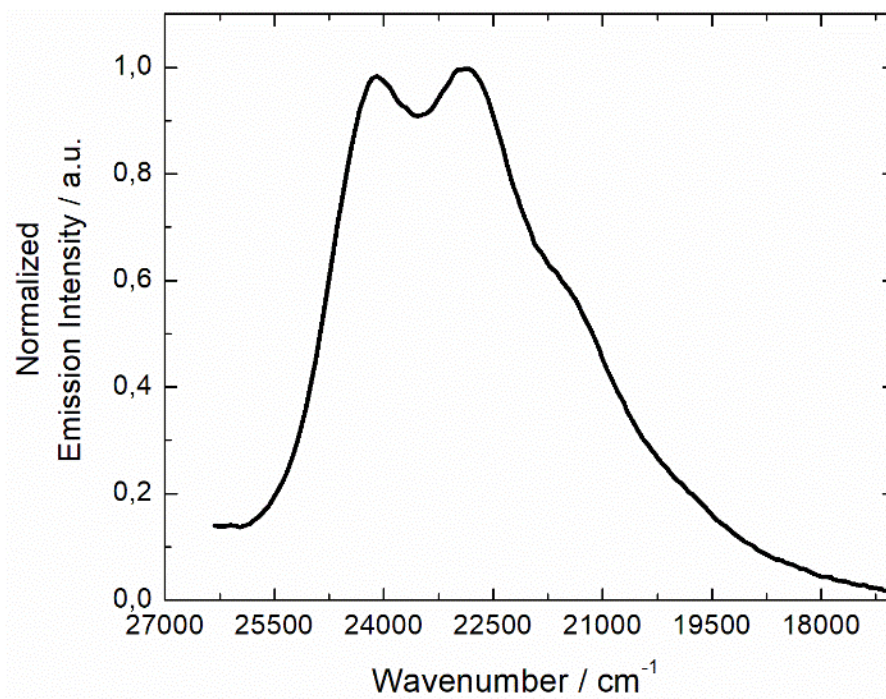

**Figure S40.** Visible ( $\lambda_{\text{ex}} = 350 \text{ nm}$ ) luminescence spectra of **19** in the solid state at room temperature.

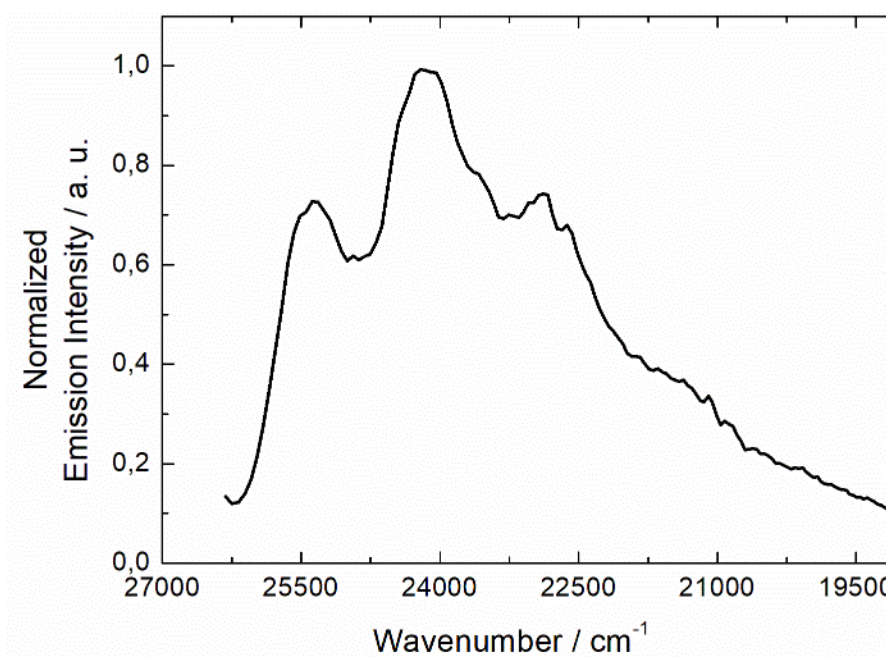

**Figure S41.** Visible ( $\lambda_{\text{ex}} = 350 \text{ nm}$ ) luminescence spectra of **15** in the solid state at 77 K.

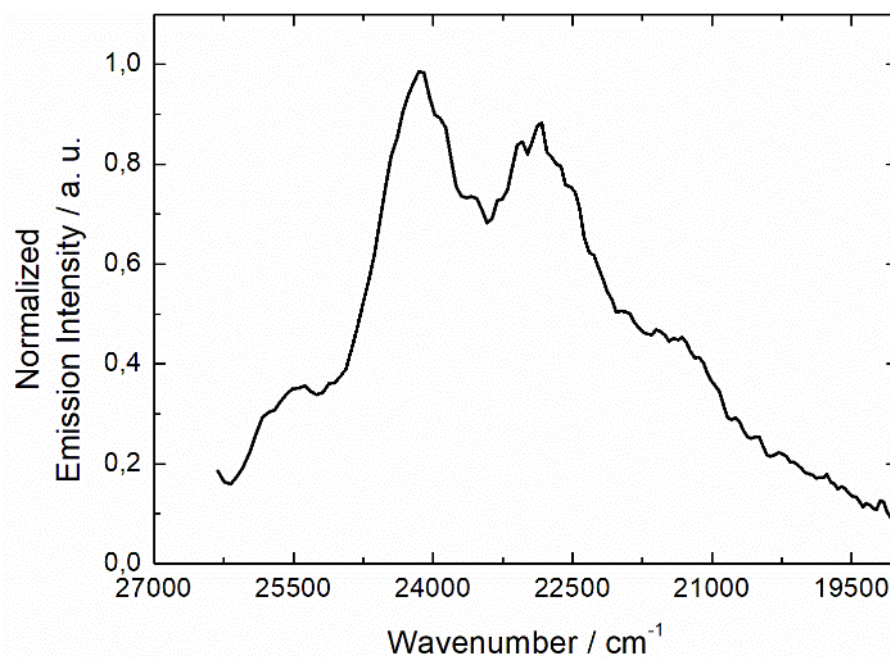

**Figure S42.** Visible ( $\lambda_{\text{ex}} = 350$  nm) luminescence spectra of **17** in the solid state at 77 K.

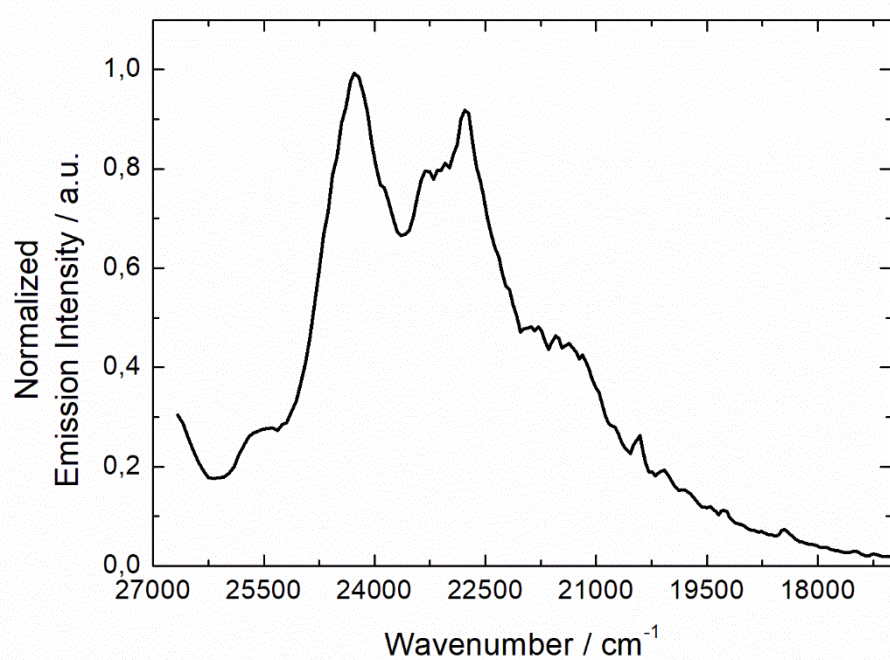

**Figure S43.** Visible ( $\lambda_{\text{ex}} = 350$  nm) luminescence spectra of **19** in the solid state at room temperature.

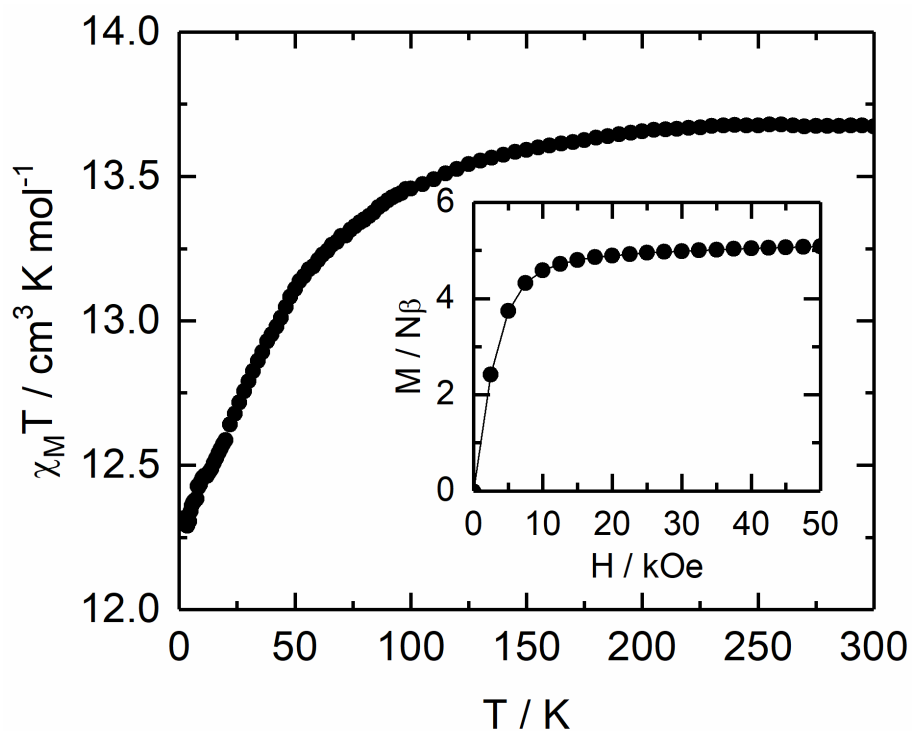

**Figure S44.** Thermal variation of  $\chi_M T$  for **1**. Inset: field variation of the magnetization of **1** at 2 K.

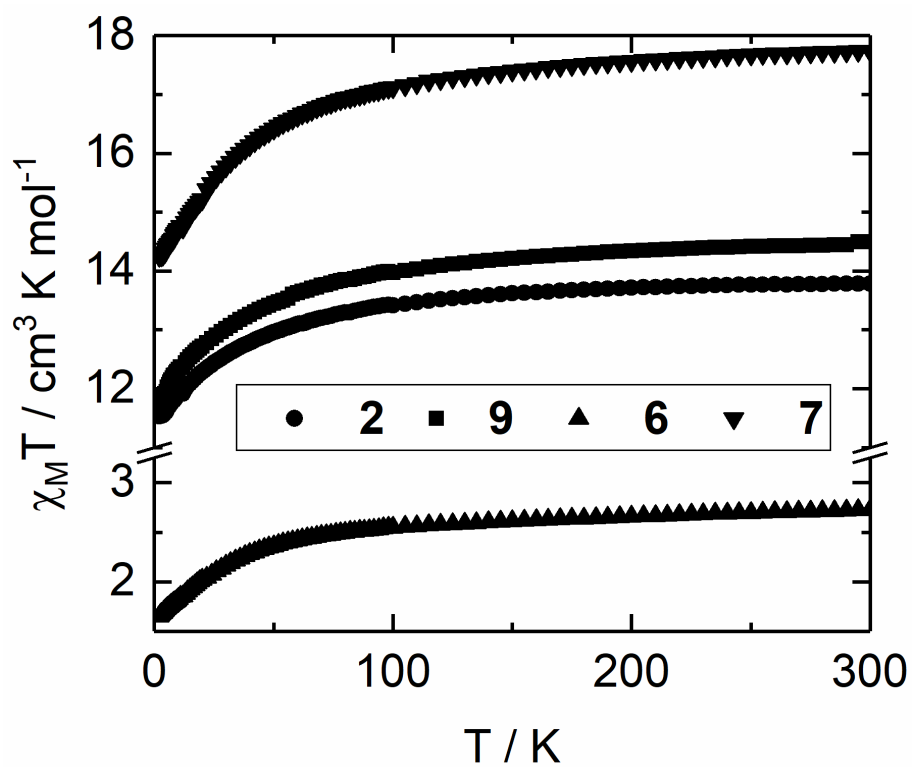

**Figure S45.** Thermal variation of  $\chi_M T$  for **2**, **6**, **7** and **9**.



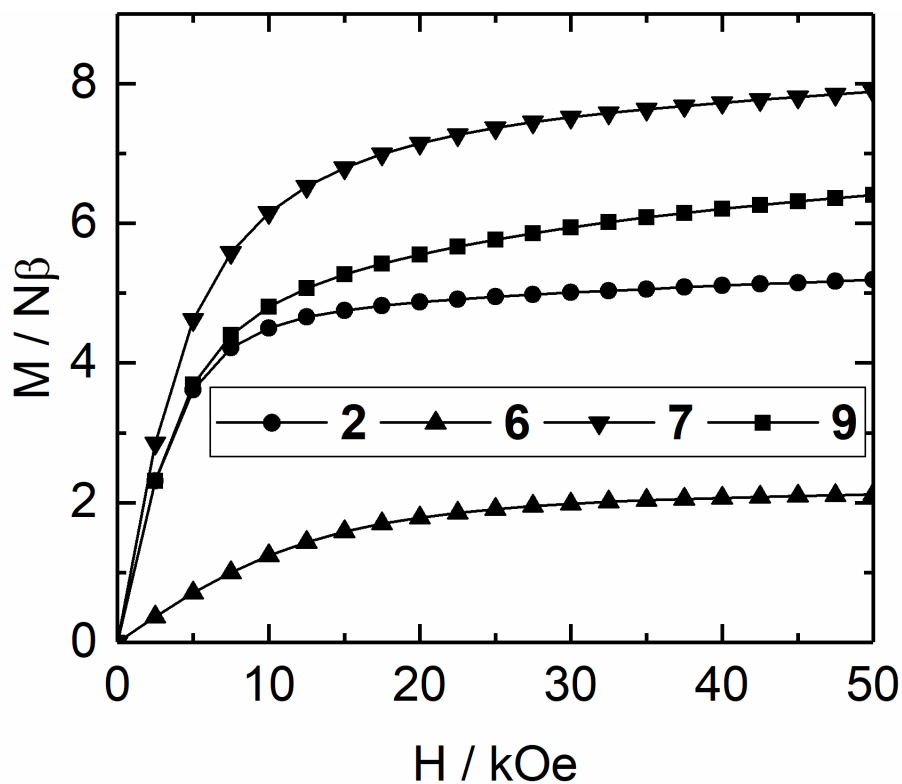

**Figure S46.** Magnetization curves at 2 K for 2, 6, 7 and 9.

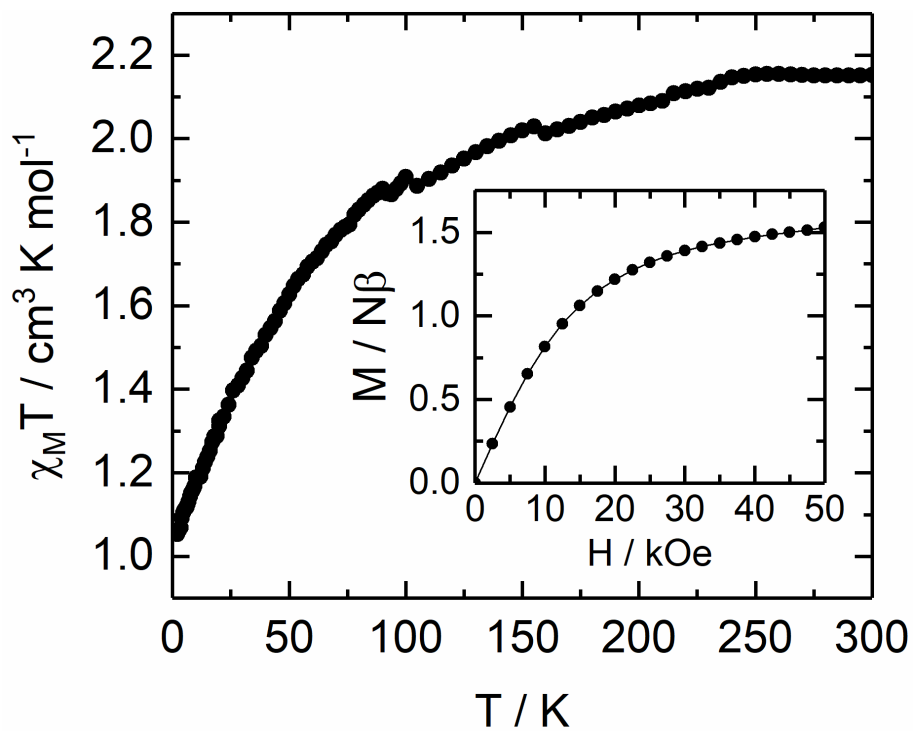

**Figure S47.** Temperature variation of  $\chi_M T$  for 3 with the field variation of the magnetization recorded at 2 K.

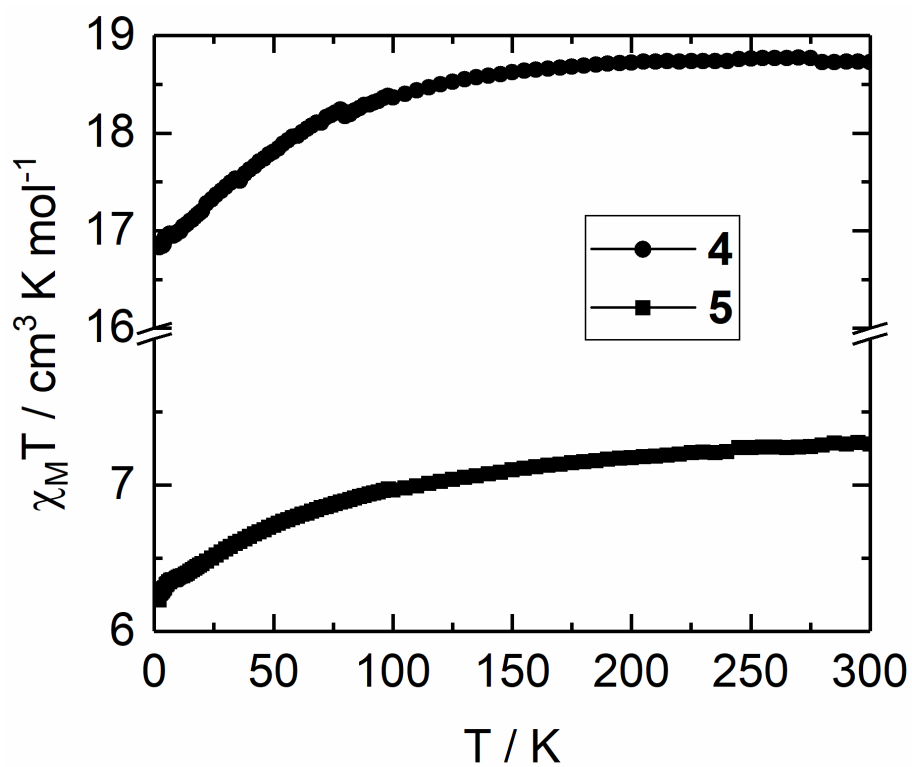

**Figure S48.** Thermal variation of  $\chi_M T$  for 4 and 5.

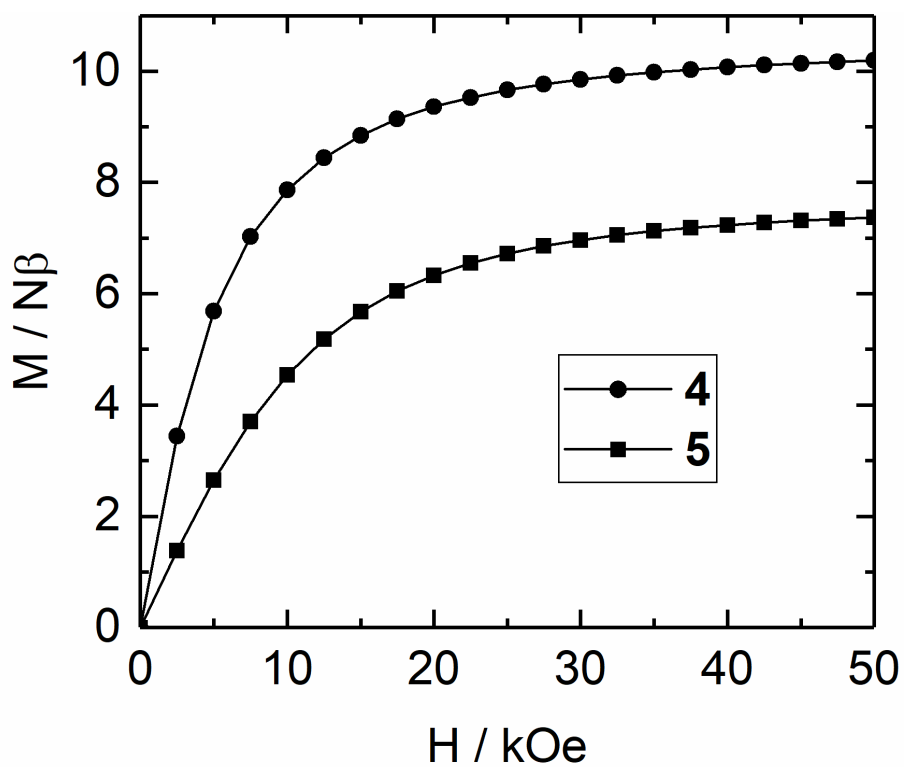

**Figure S49.** Magnetization curves at 2 K for 4 and 5.

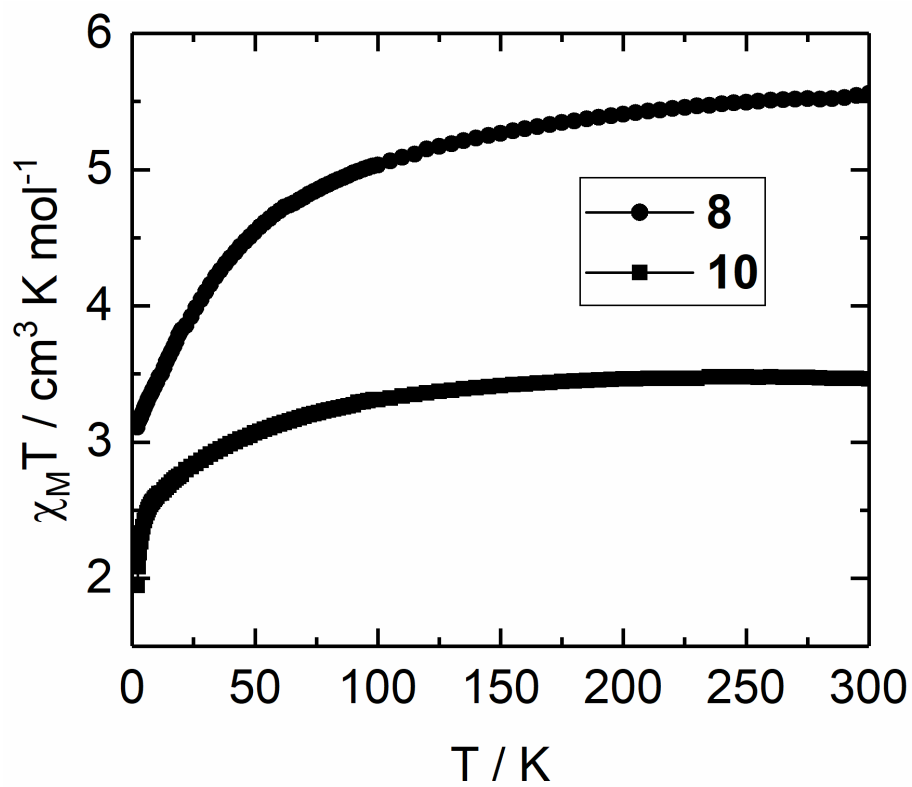

Figure S50. Thermal variation of  $\chi_M T$  for 8 and 10.

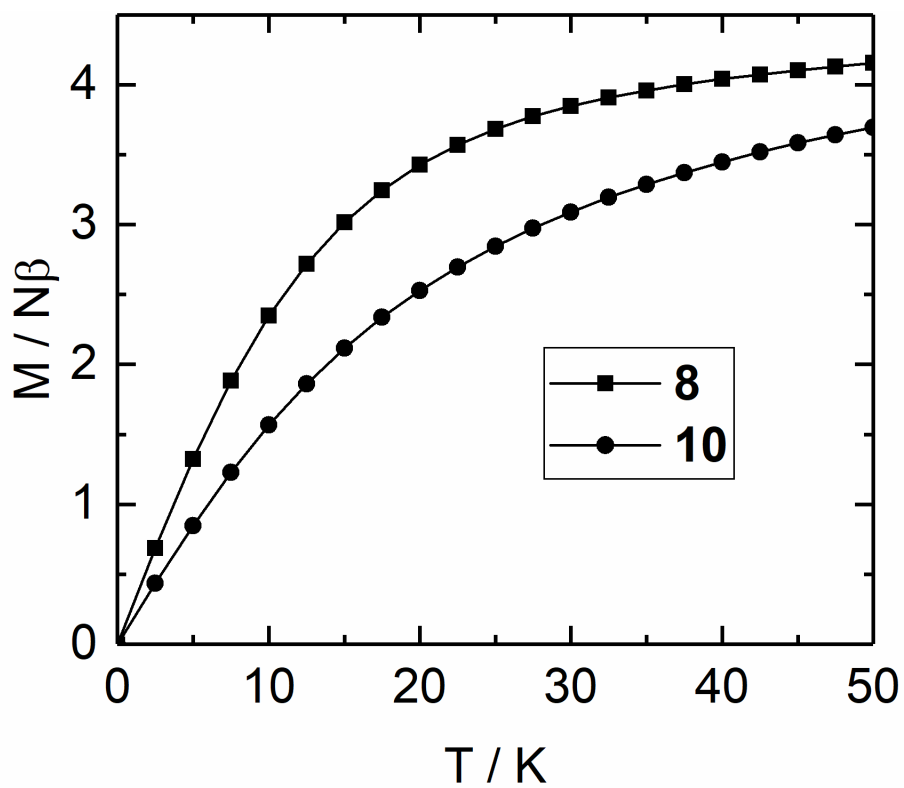

Figure S51. Magnetization curves at 2 K for 8 and 10.

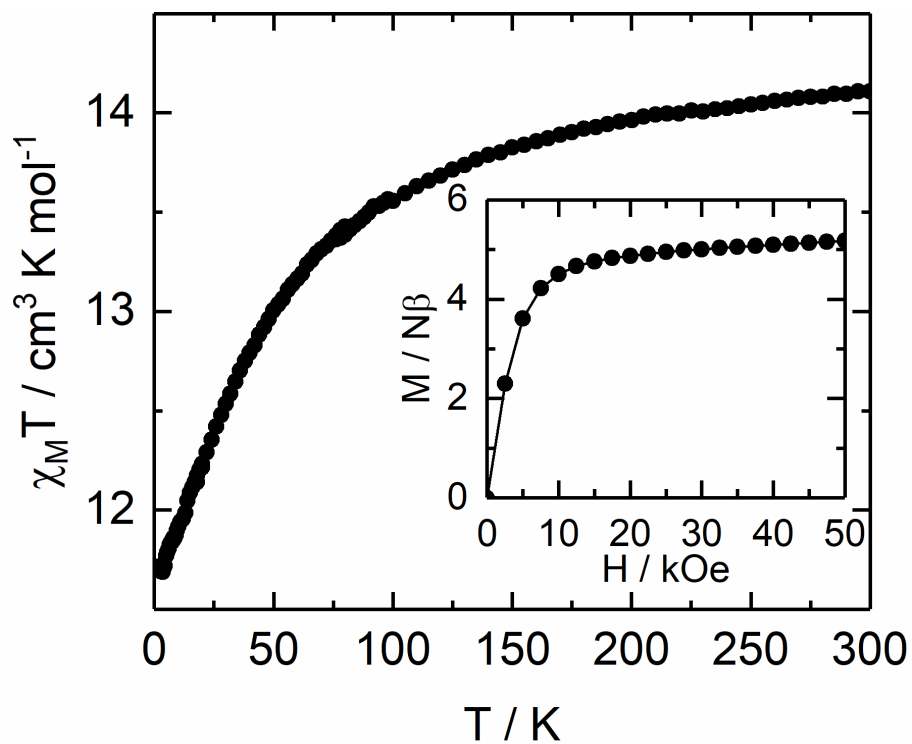

**Figure S52.** Thermal variation of  $\chi_M T$  for **11** with the magnetization curve at 2 K in inset.

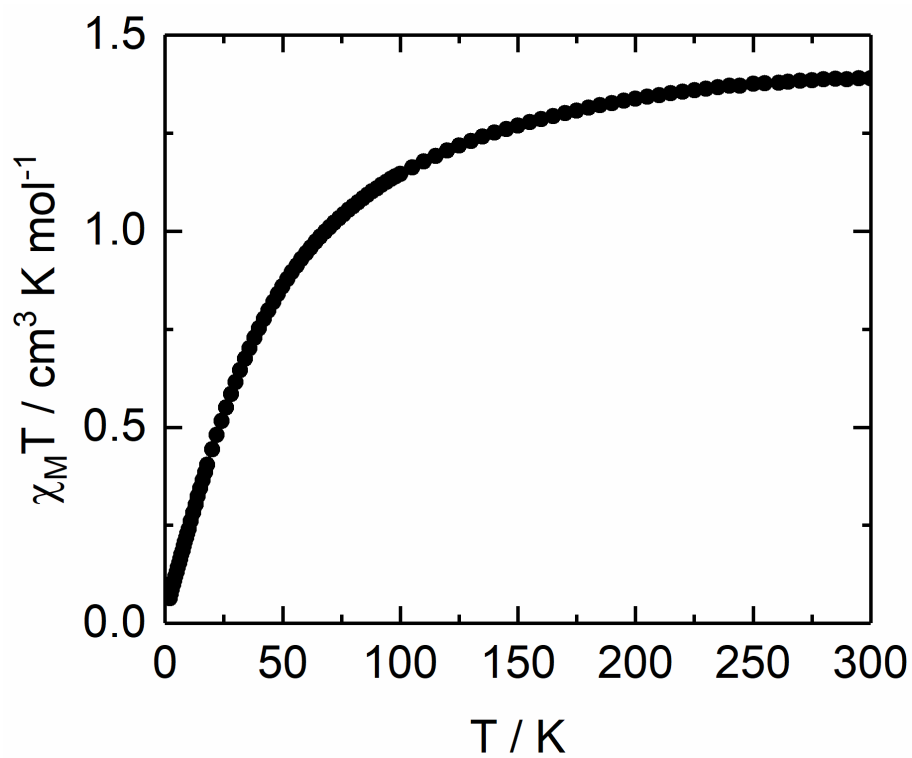

**Figure S53.** Thermal variation of  $\chi_M T$  for **14**.

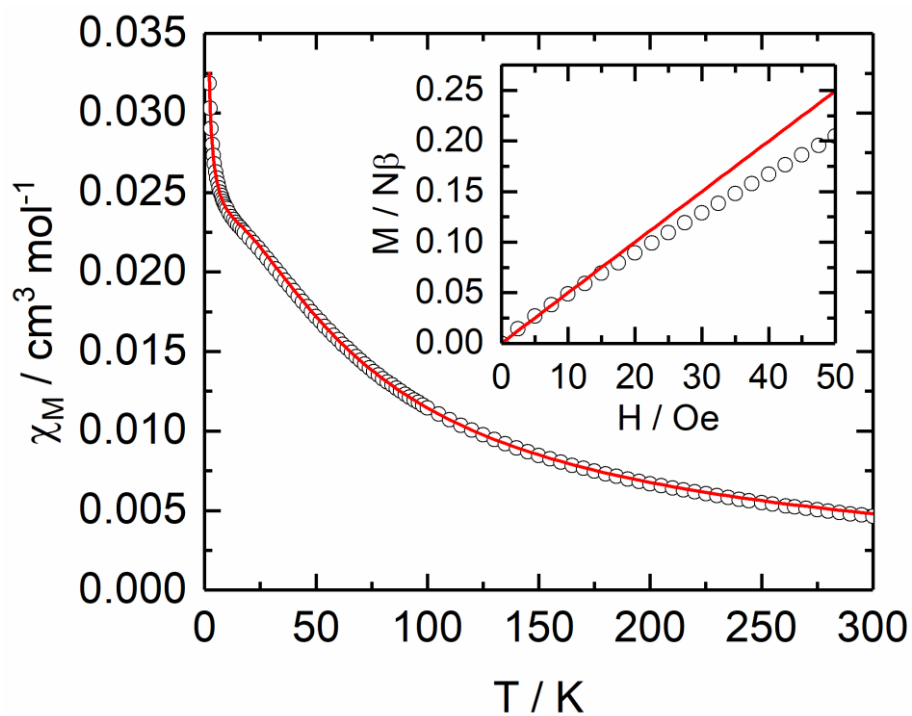

**Figure S54.** Thermal variation of  $\chi_M$  for **14** with the magnetization curve at 2 K in inset. The red line corresponds to the best fitted curve for  $\chi_M$  vs. T (see main text).

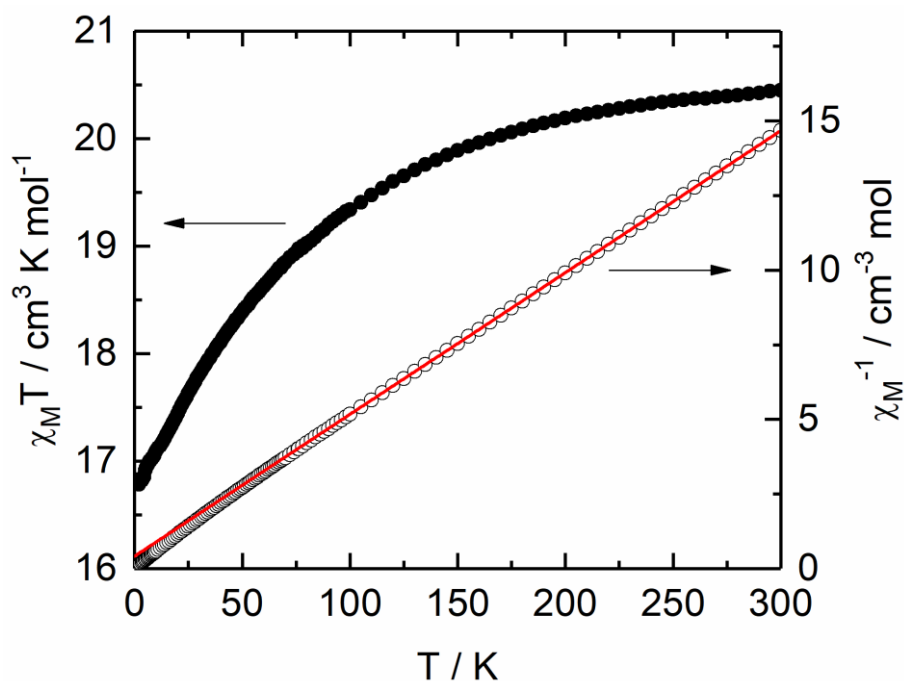

**Figure S55.** Thermal variation of  $\chi_M T$  and  $\chi_M^{-1}$  for **15**. The red line corresponds to the best fitted curve for  $\chi_M^{-1}$  vs. T with Curie-Weiss law (see main text).

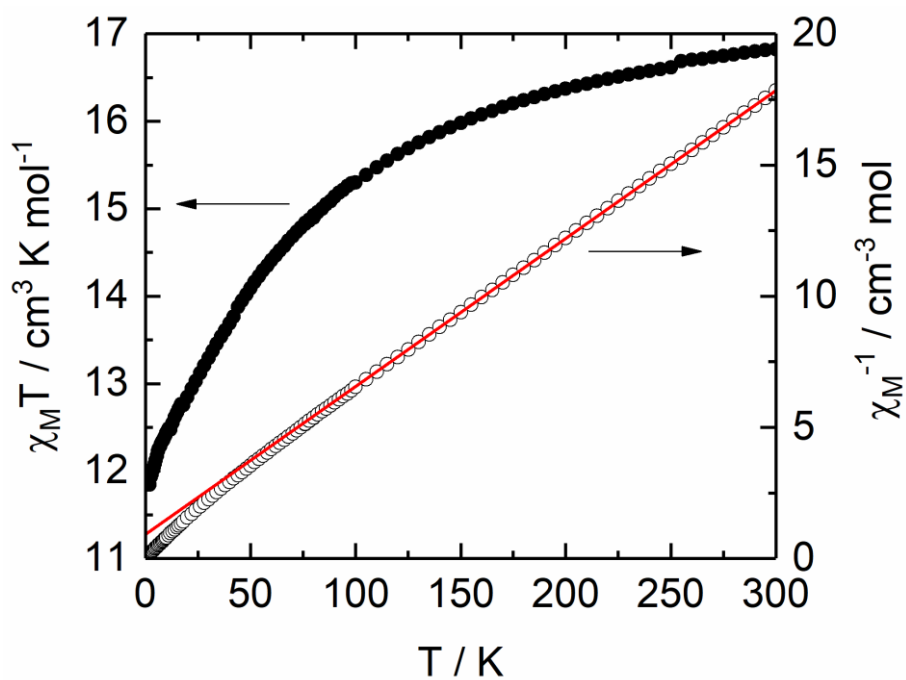

**Figure S56.** Thermal variation of  $\chi_M T$  and  $\chi_M^{-1}$  for **16**. The red line corresponds to the best fitted curve for  $\chi_M^{-1}$  vs. T with Curie-Weiss law (see main text).

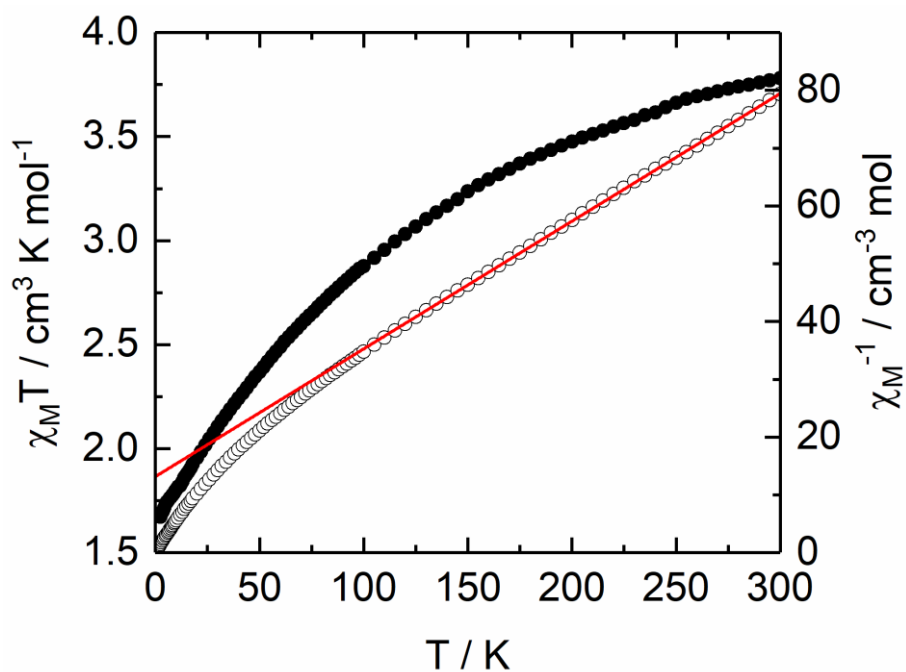

**Figure S57.** Thermal variation of  $\chi_M T$  and  $\chi_M^{-1}$  for **17**. The red line corresponds to the best fitted curve for  $\chi_M^{-1}$  vs. T with Curie-Weiss law (see main text).

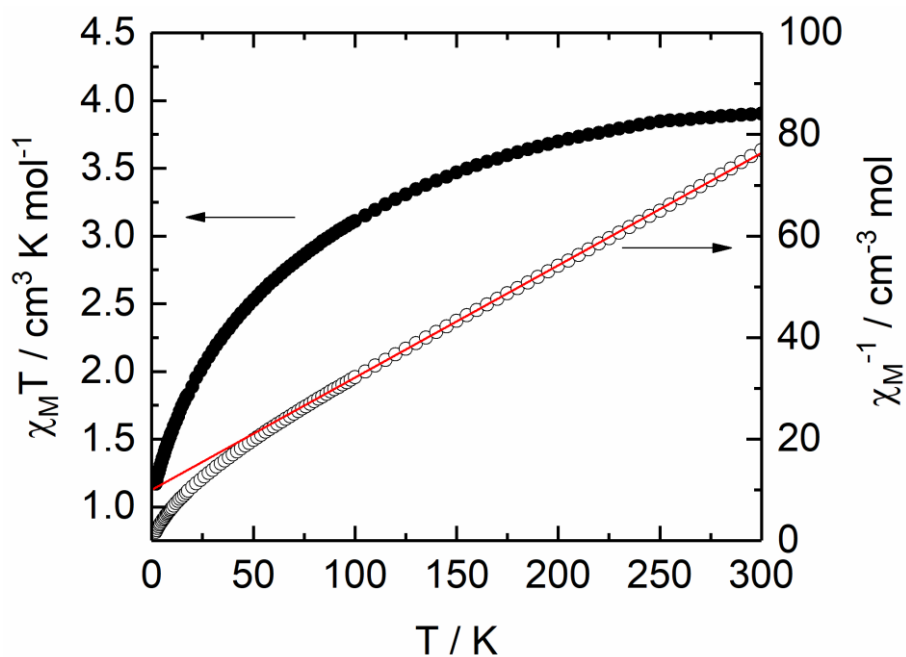

**Figure S58.** Thermal variation of  $\chi_M T$  and  $\chi_M^{-1}$  for **19**. The red line corresponds to the best fitted curve for  $\chi_M^{-1}$  vs.  $T$  with Curie-Weiss law (see main text).

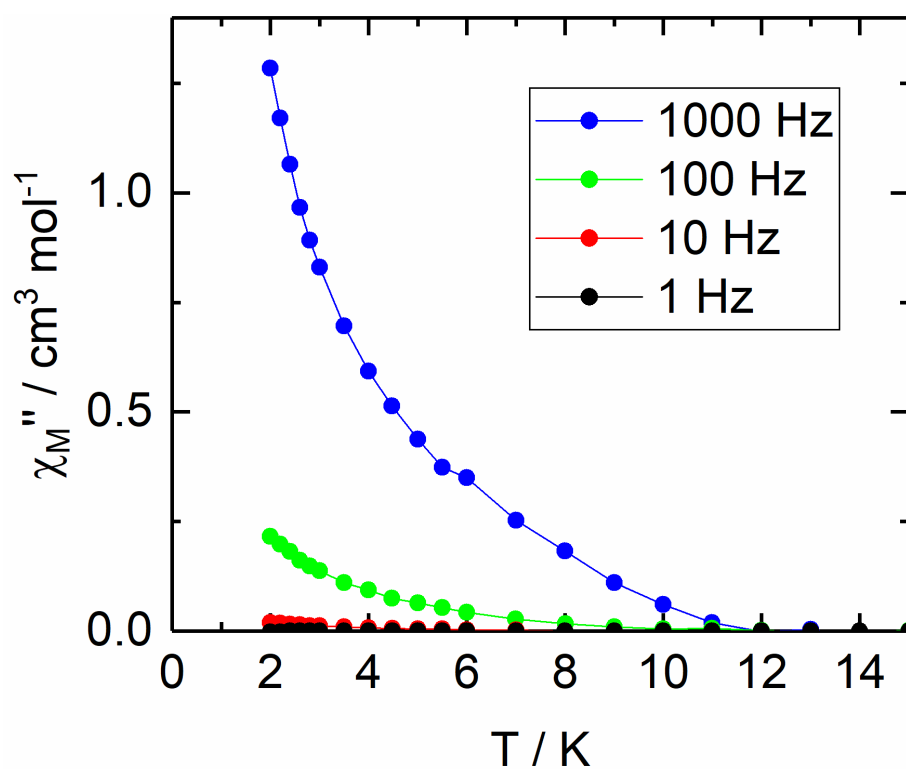

**Figure S59.** Thermal variation of  $\chi_M''$  in zero external dc field for **1** at various frequencies of the oscillating field.

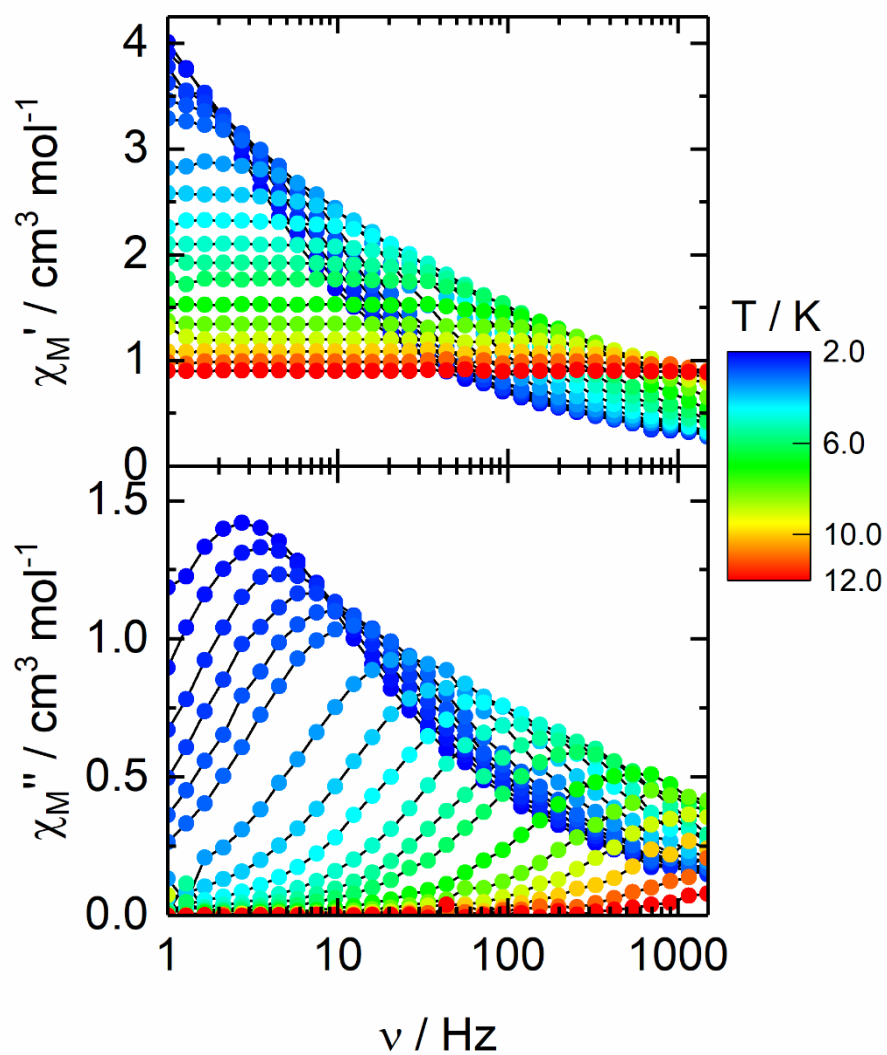

**Figure S60.** Frequency dependence of the in-phase (above) and out-of phase (below) components of the magnetic susceptibility for **1** under an applied magnetic field of 1500 Oe in the temperature range 2-12 K.



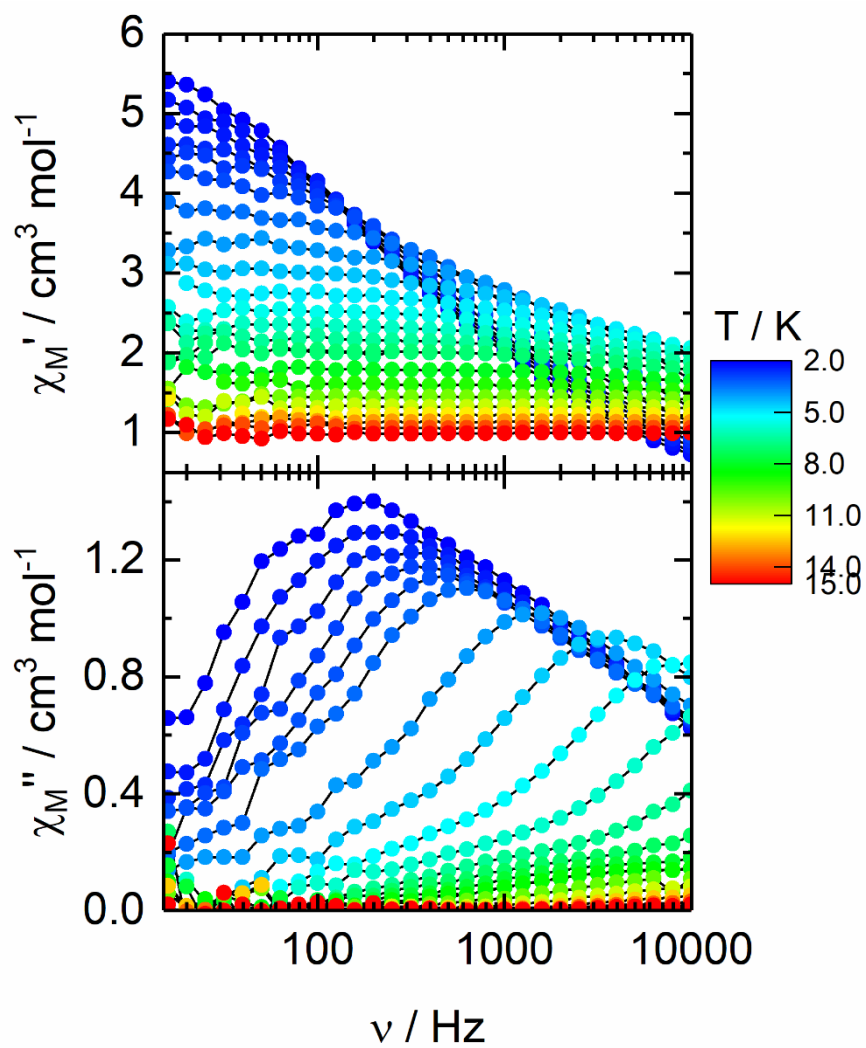

**Figure S61.** Frequency dependence of the in-phase (above) and out-of phase (below) components of the magnetic susceptibility for **2** under an applied magnetic field of 1500 Oe in the temperature range 2-15 K.

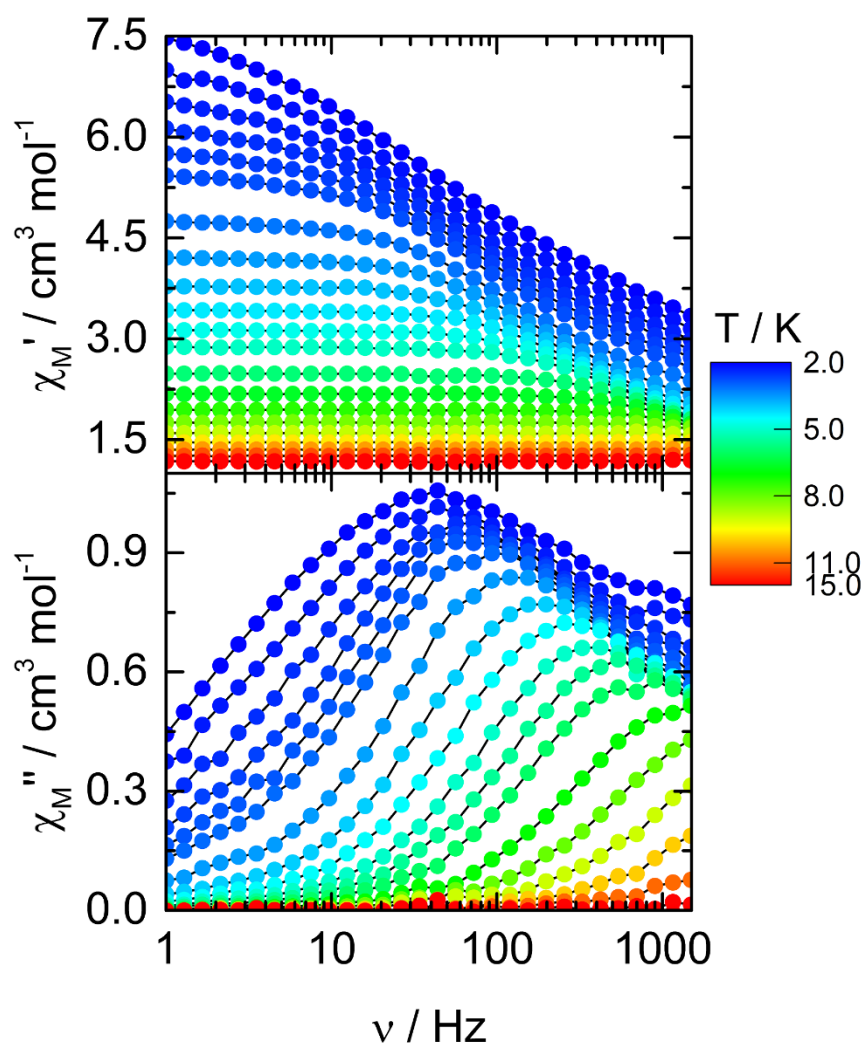

**Figure S62.** Frequency dependence of the in-phase (above) and out-of phase (below) components of the magnetic susceptibility for **4** under an applied magnetic field of 1500 Oe in the temperature range 2-15 K.

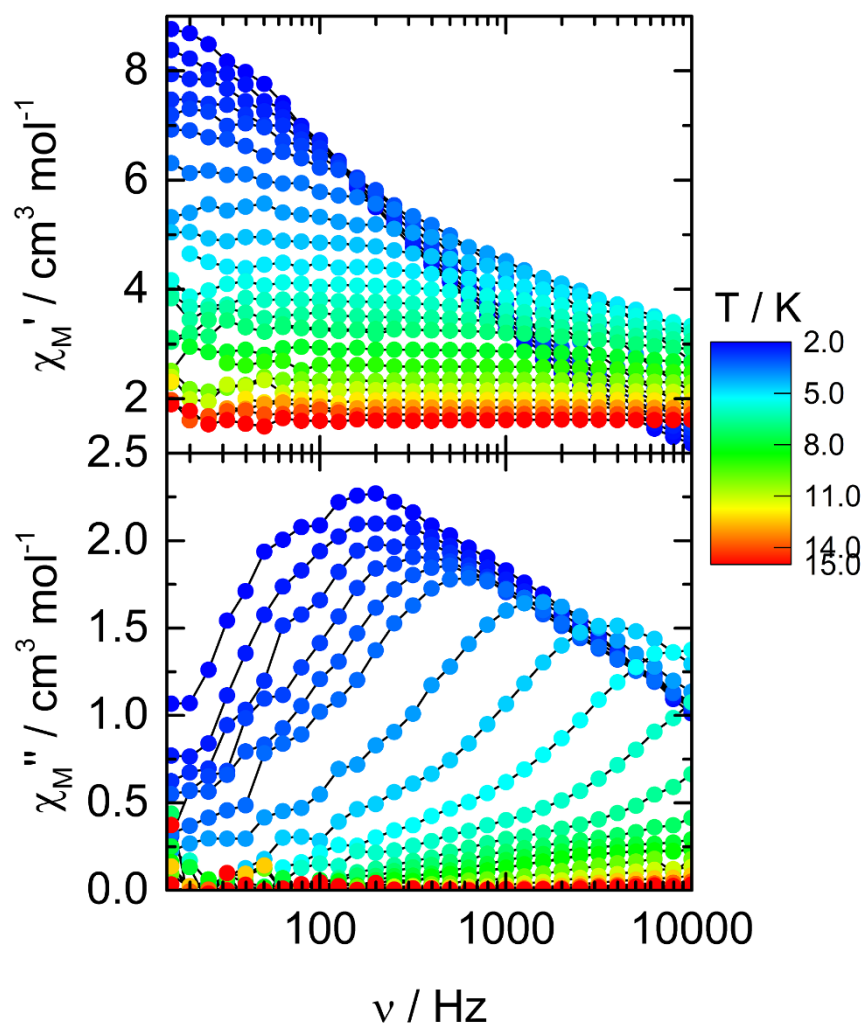

**Figure S63.** Frequency dependence of the in-phase (above) and out-of phase (below) components of the magnetic susceptibility for **7** under an applied magnetic field of 1500 Oe in the temperature range 2-15 K.

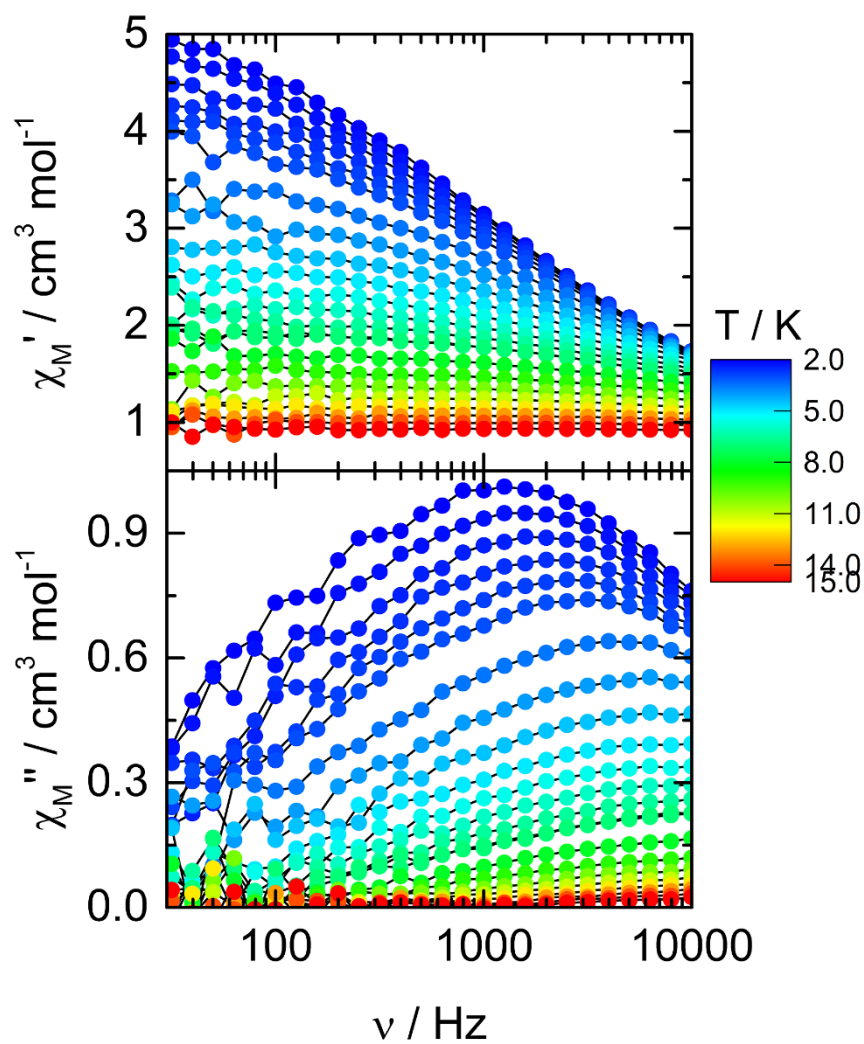

**Figure S64.** Frequency dependence of the in-phase (above) and out-of phase (below) components of the magnetic susceptibility for **9** under an applied magnetic field of 1500 Oe in the temperature range 2-15 K.

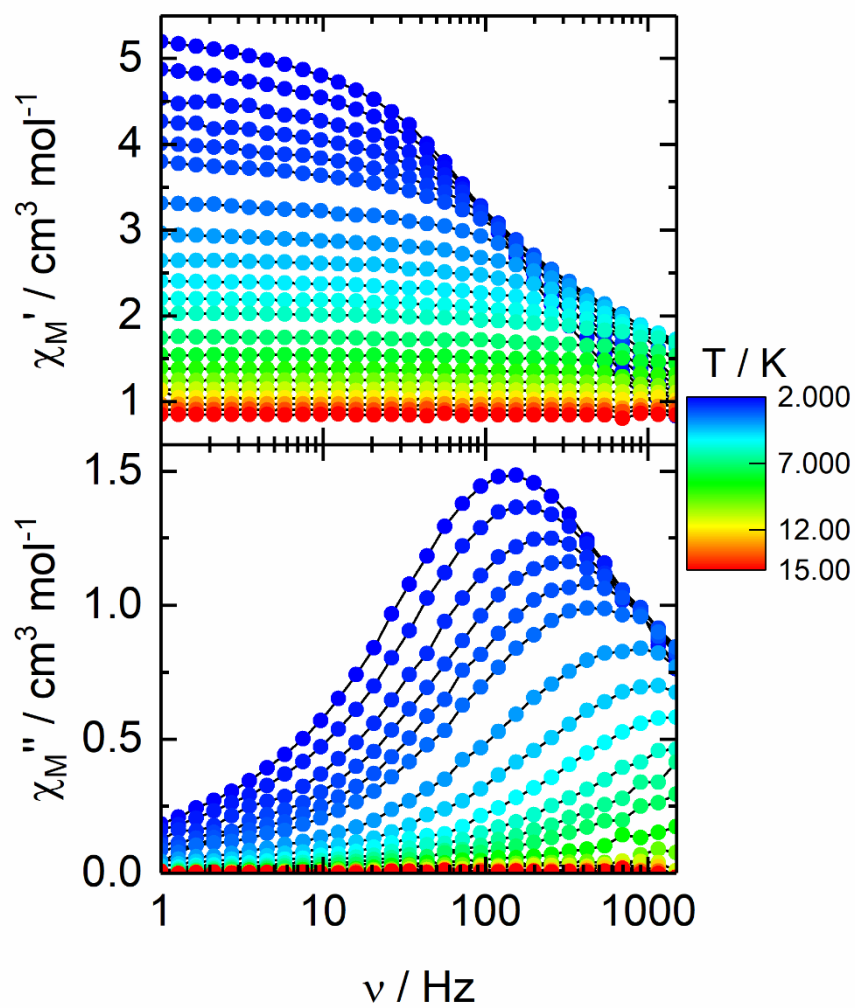

**Figure S65.** Frequency dependence of the in-phase (above) and out-of phase (below) components of the magnetic susceptibility for **11** under an applied magnetic field of 1500 Oe in the temperature range 2-15 K.

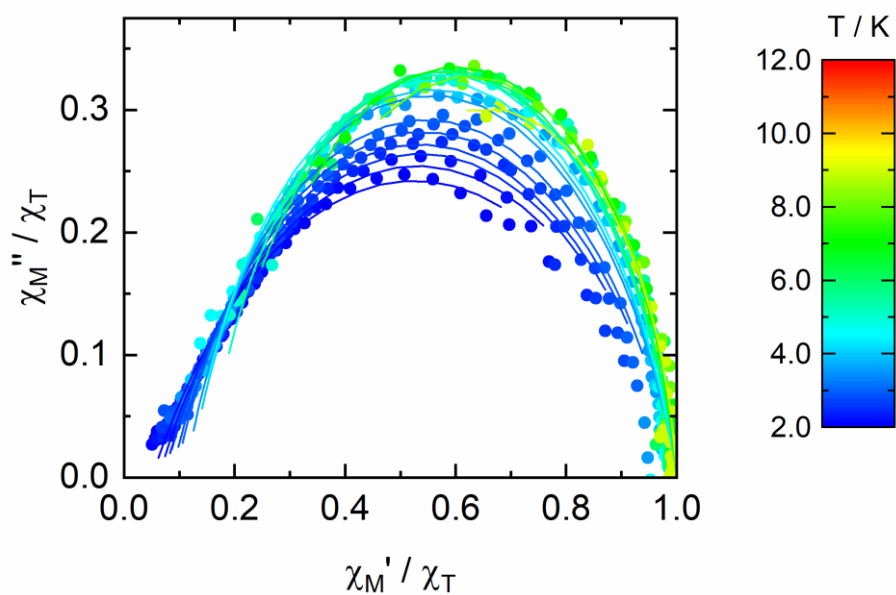

**Figure S66.** Normalized Cole-Cole plots for **1** at several temperatures between 2 and 9 K under an applied magnetic field of 1.5 kOe. Full lines are the best fitted curve with the extended Debye model.

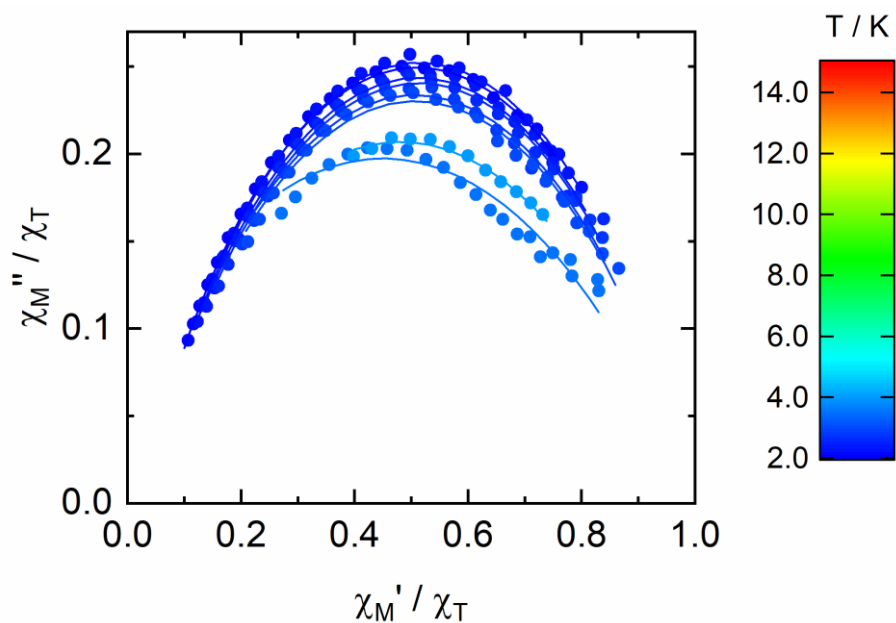

**Figure S67.** Normalized Cole-Cole plots for **2** at several temperatures between 2 and 4.5 K under an applied magnetic field of 1.5 kOe. Full lines are the best fitted curve with the extended Debye model.

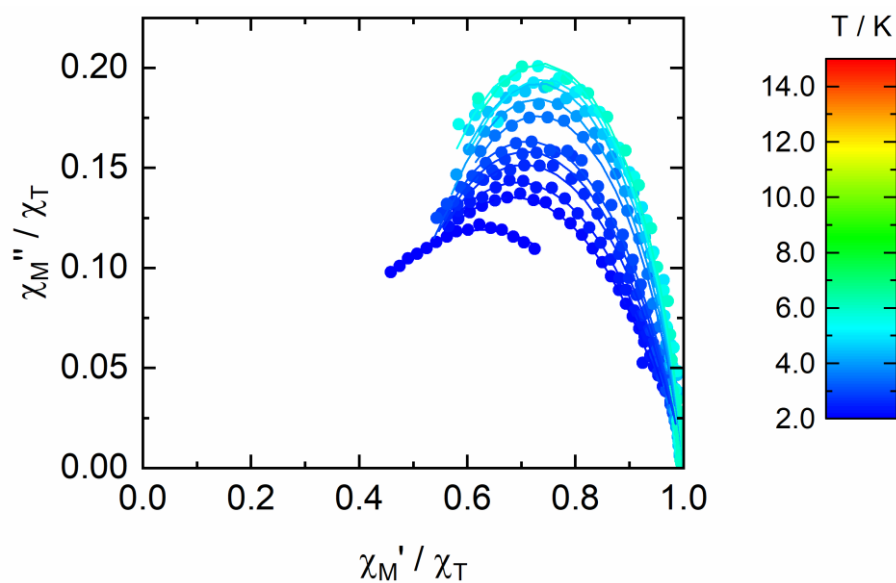

**Figure S68.** Normalized Cole-Cole plots for **4** at several temperatures between 2 and 6.5 K under an applied magnetic field of 1.5 kOe. Full lines are the best fitted curve with the extended Debye model.

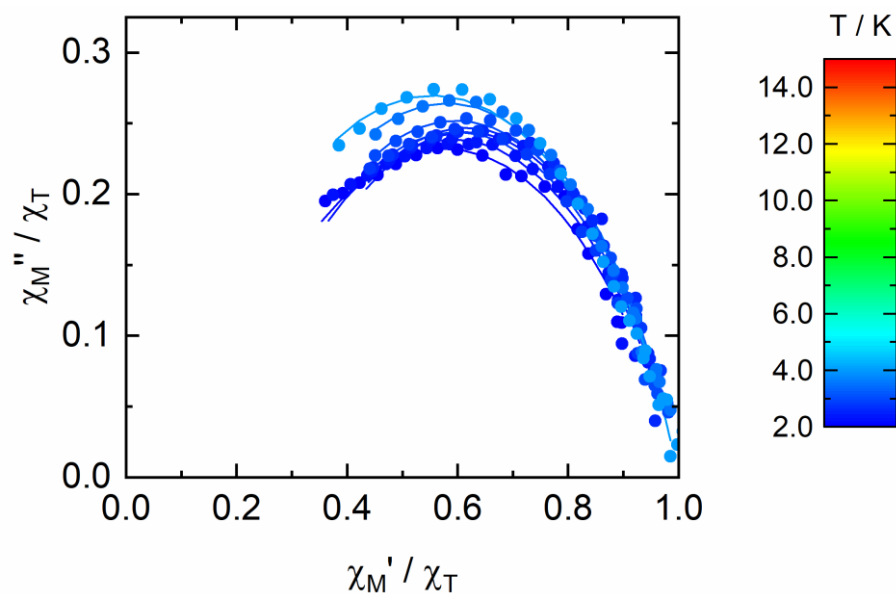

**Figure S69.** Normalized Cole-Cole plots for **7** at several temperatures between 2 and 4.5 K under an applied magnetic field of 1.5 kOe. Full lines are the best fitted curve with the extended Debye model.

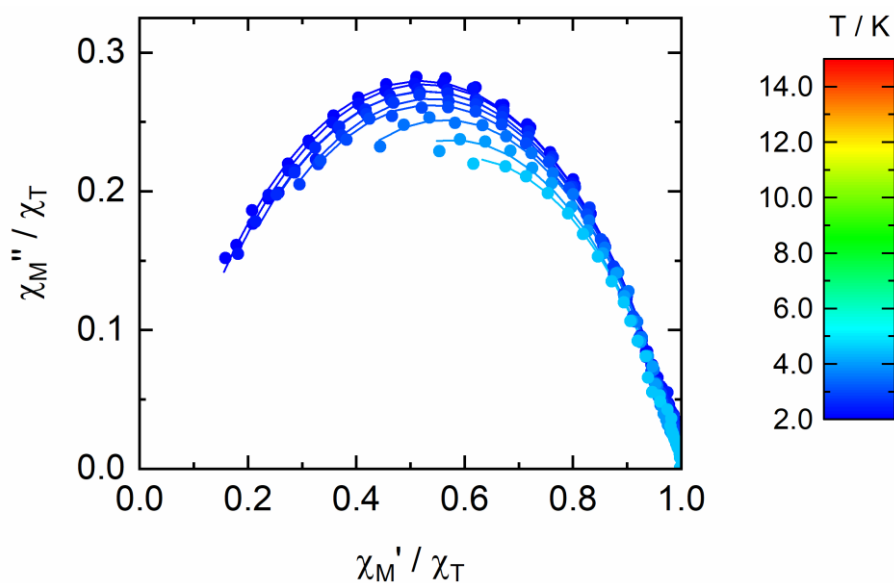

**Figure S70.** Normalized Cole-Cole plots for **11** at several temperatures between 2 and 4.5 K under an applied magnetic field of 1.5 kOe. Full lines are the best fitted curve with the extended Debye model.

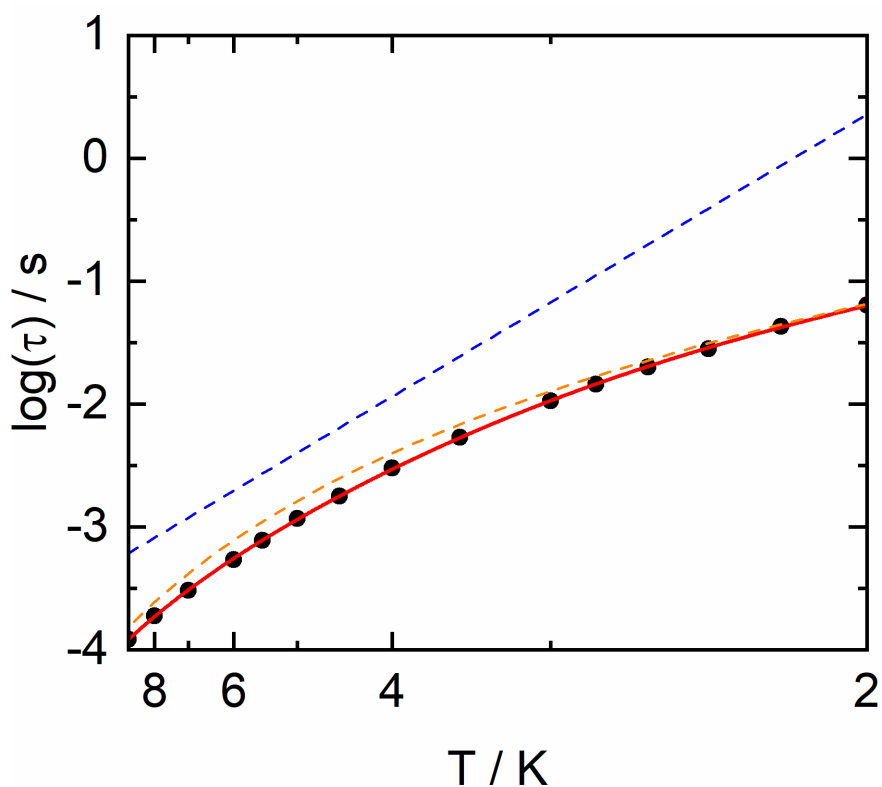

**Figure S71.** Temperature dependence of the relaxation time for **1** at 1.5 kOe in the temperature range of 2 – 9 K with the best-fitted curve (full red line) with the combination Orbach + Raman processes. The Orbach and Raman contributions to the relaxation time are respectively represented in dashed blue line and dashed orange line (the parameters are given in Table S16).



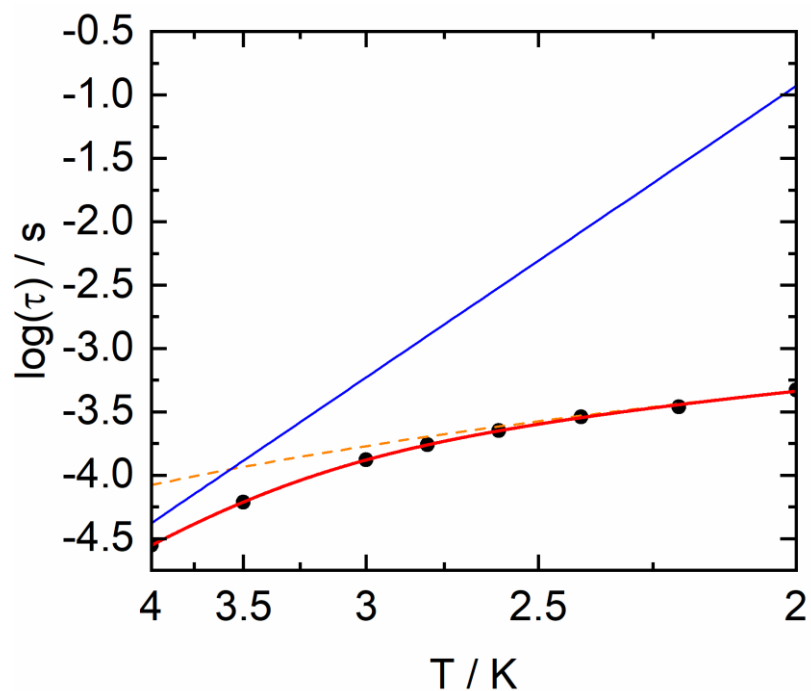

**Figure S72.** Temperature dependence of the relaxation time for **2** at 1.5 kOe in the temperature range of 2 – 4 K with the best-fitted curve (full red line) with the combination Orbach + Raman processes. The Orbach and Raman contributions to the relaxation time are respectively represented in blue line and dashed orange line (the parameters are given in Table S16).

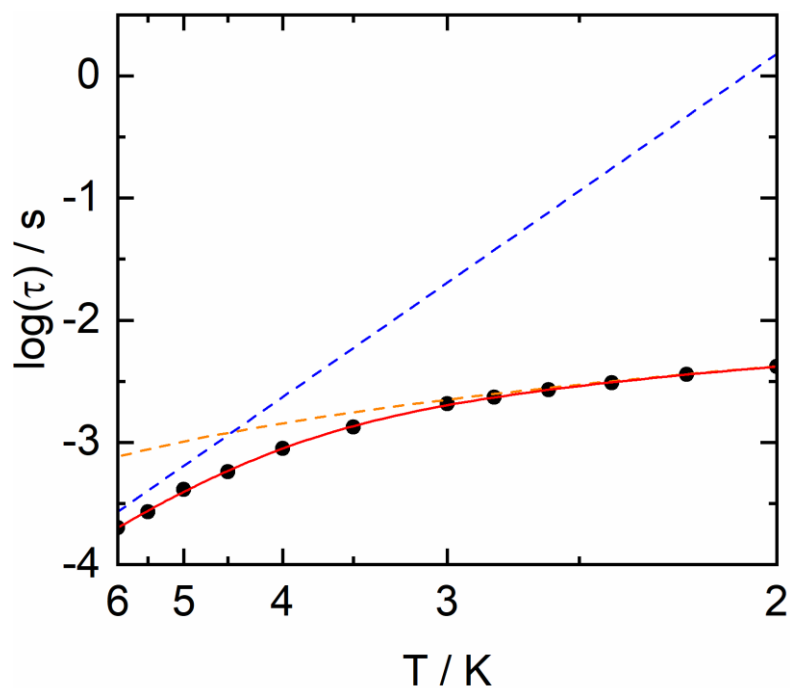

**Figure S73.** Temperature dependence of the relaxation time for **4** at 1.5 kOe in the temperature range of 2 – 6 K with the best-fitted curve (full red line) with the combination Orbach + Raman processes. The Orbach and Raman contributions to the relaxation time are respectively represented in dashed blue line and dashed orange line (the parameters are given in Table S16).

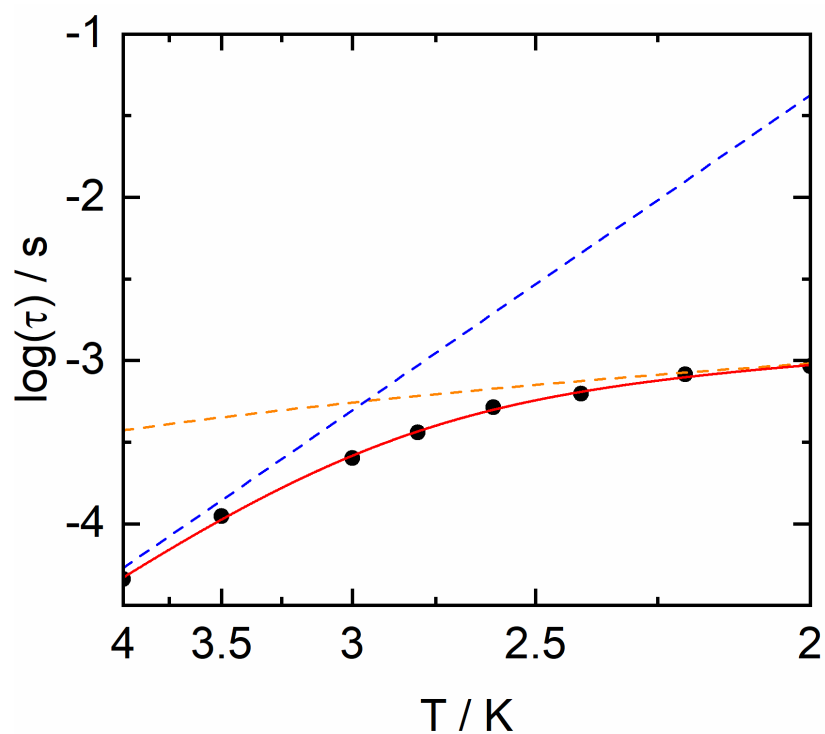

**Figure S74.** Temperature dependence of the relaxation time for **7** at 1.5 kOe in the temperature range of 2 – 4 K with the best-fitted curve (full red line) with the combination Orbach + Raman processes. The Orbach and Raman contributions to the relaxation time are respectively represented in dashed blue line and dashed orange line (the parameters are given in Table S16).

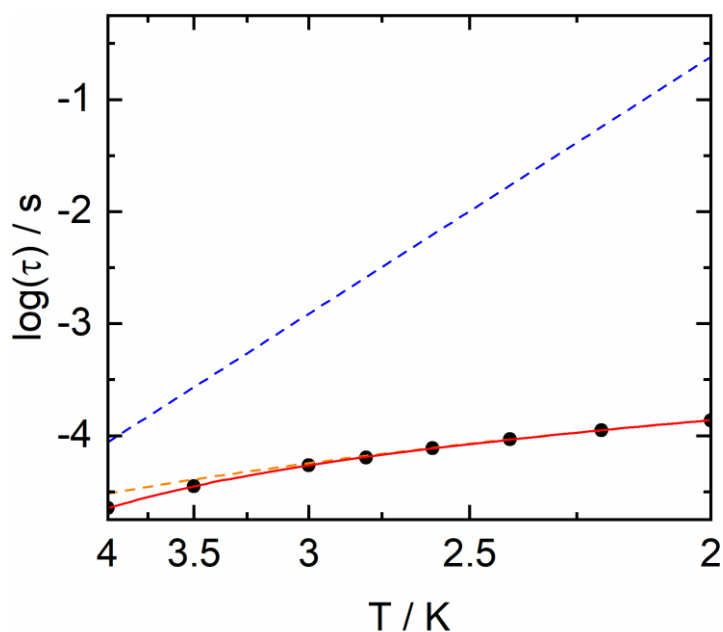

**Figure S75.** Temperature dependence of the relaxation time for **9** at 1.5 kOe in the temperature range of 2 – 4 K with the best-fitted curve (full red line) with the combination Orbach + Raman processes. The Orbach and Raman contributions to the relaxation time are respectively represented in dashed blue line and dashed orange line (the parameters are given in Table S16).

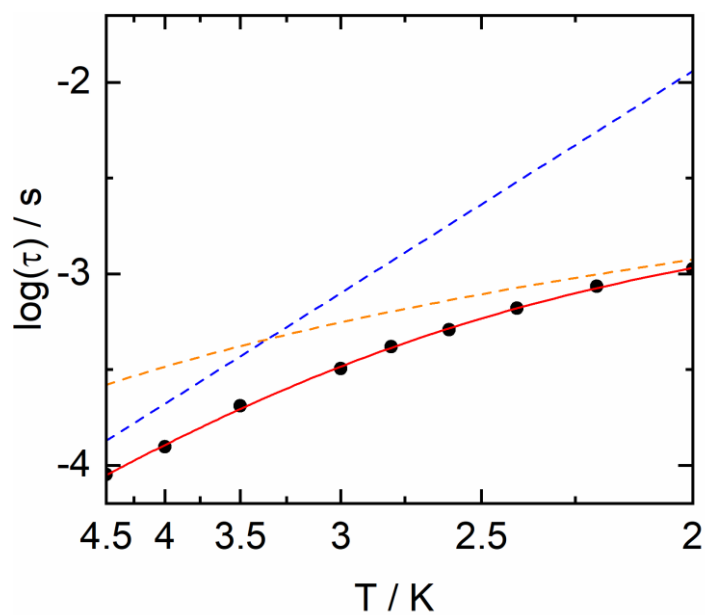

**Figure S76.** Temperature dependence of the relaxation time for **11** at 1.5 kOe in the temperature range of 2 – 4.5 K with the best-fitted curve (full red line) with the combination Orbach + Raman processes. The Orbach and Raman contributions to the relaxation time are respectively represented in dashed blue line and dashed orange line (the parameters are given in Table S16).

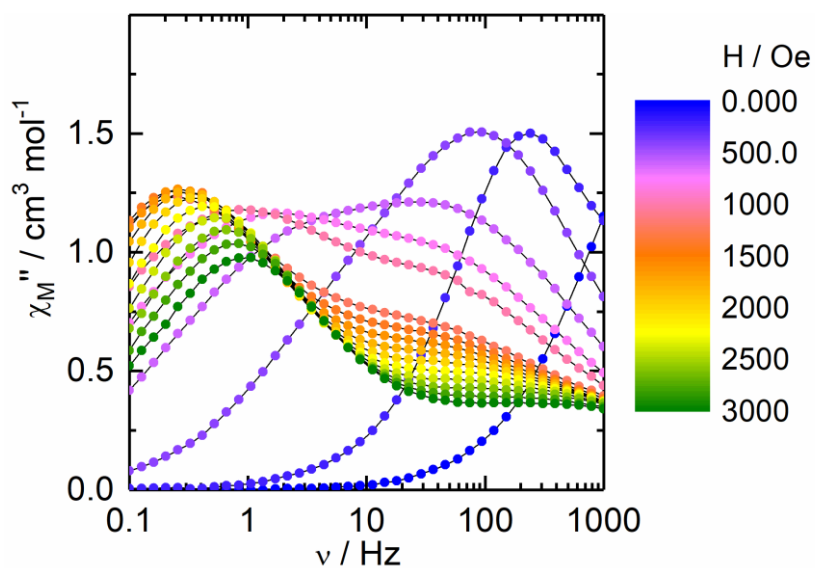

**Figure S77.** Frequency variation of  $\chi_M''$  for **15** at 2 K at various external dc fields.

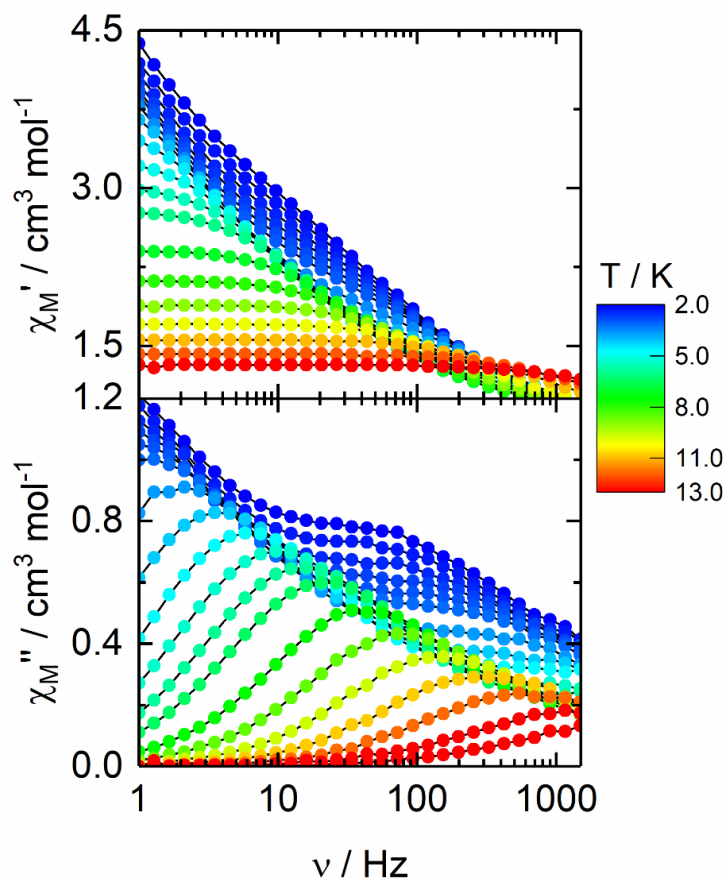

**Figure S78.** Frequency dependence of the in-phase (above) and out-of phase (below) components of the magnetic susceptibility for **15** under an applied magnetic field of 1500 Oe in the temperature range 2-13 K.

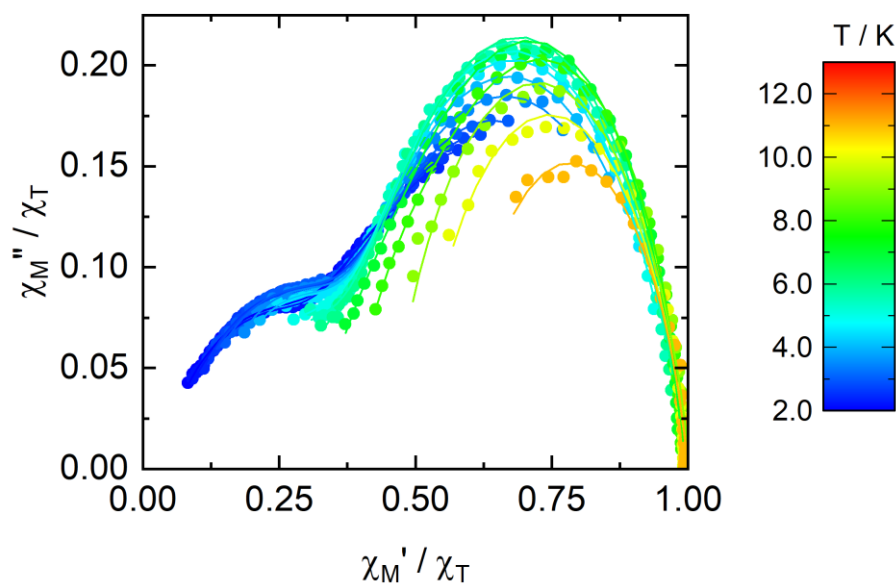

**Figure S79.** Normalized Cole-Cole plots for **15** at several temperatures between 2 and 11 K under an applied magnetic field of 1.5 kOe. Full lines are the best fitted curve with the extended Debye model.

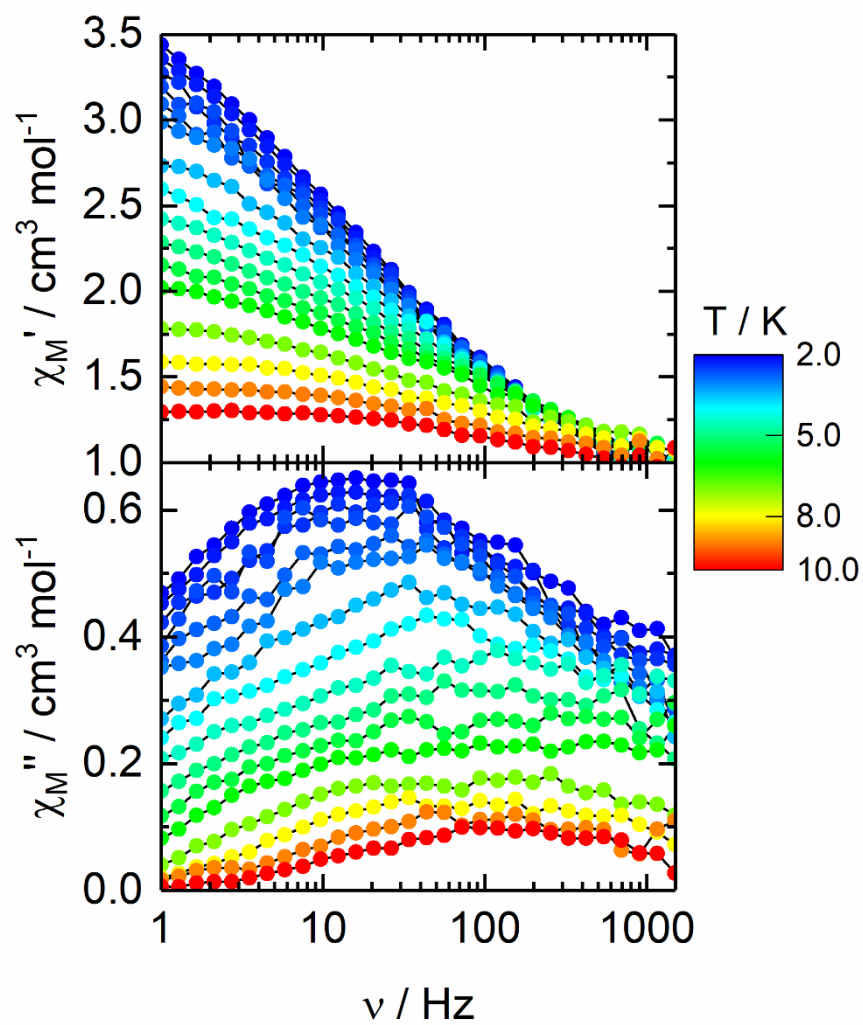

**Figure S79.** Frequency dependence of the in-phase (above) and out-of phase (below) components of the magnetic susceptibility for **16** under an applied magnetic field of 3000 Oe in the temperature range 2-10 K.

**Table S1.** X-ray crystallographic data for the complexes **1, 3, 4, 6, 8, 11-13**.

| Compounds                                           | [CdDy(hfac) <sub>5</sub> (L)] <sub>2</sub><br>(1)                                                                                | [ZnYb(hfac) <sub>5</sub> (L)] <sub>2</sub> ·(CH <sub>2</sub> Cl <sub>2</sub> )<br>(3)                                                            | [MnDy(hfac) <sub>5</sub> (L)] <sub>2</sub> ·2(CH <sub>2</sub> Cl <sub>2</sub> )<br>(4)                            |
|-----------------------------------------------------|----------------------------------------------------------------------------------------------------------------------------------|--------------------------------------------------------------------------------------------------------------------------------------------------|-------------------------------------------------------------------------------------------------------------------|
| Formula                                             | C <sub>118</sub> H <sub>70</sub> Cd <sub>2</sub> Dy <sub>2</sub> F <sub>60</sub> N <sub>16</sub> O <sub>20</sub> S <sub>12</sub> | C <sub>119</sub> H <sub>72</sub> Cl <sub>2</sub> Zn <sub>2</sub> Yb <sub>2</sub> F <sub>60</sub> N <sub>16</sub> O <sub>20</sub> S <sub>12</sub> | C <sub>61</sub> H <sub>39</sub> Cl <sub>4</sub> MnDyF <sub>30</sub> N <sub>8</sub> O <sub>10</sub> S <sub>6</sub> |
| M / g.mol <sup>-1</sup>                             | 4106.42                                                                                                                          | 4118.36                                                                                                                                          | 2165.60                                                                                                           |
| Crystal system                                      | Triclinic                                                                                                                        | Triclinic                                                                                                                                        | triclinic                                                                                                         |
| Space group                                         | P-1 (N°2)                                                                                                                        | P-1 (N°2)                                                                                                                                        | P-1 (N°2)                                                                                                         |
| Cell parameters                                     | a = 12.700(3) Å<br>b = 24.985(5) Å<br>c = 26.286(5) Å<br>α = 101.213(6)°<br>β = 99.668(5)°<br>γ = 98.737(6)°                     | a = 12.640(4) Å<br>b = 26.082(8) Å<br>c = 26.380(8) Å<br>α = 101.645(8)°<br>β = 90.606(9)°<br>γ = 100.406(9)°                                    | a = 12.813(2) Å<br>b = 17.119(3) Å<br>c = 19.788(4) Å<br>α = 86.381(6)°<br>β = 89.219(6)°<br>γ = 76.672(6)°       |
| Volume / Å <sup>3</sup>                             | 7917(3)                                                                                                                          | 8368(5)                                                                                                                                          | 4215.0(14)                                                                                                        |
| Cell formula units                                  | 2                                                                                                                                | 2                                                                                                                                                | 2                                                                                                                 |
| T / K                                               | 150 (2)                                                                                                                          | 150(2)                                                                                                                                           | 150(2)                                                                                                            |
| Diffraction reflection                              | 5.83 ≤ 2θ ≤ 54.97                                                                                                                | 4.16 ≤ 2θ ≤ 55.52                                                                                                                                | 4.12 ≤ 2θ ≤ 55.49                                                                                                 |
| ρ <sub>calc</sub> , g.cm <sup>-3</sup>              | 1.723                                                                                                                            | 1.641                                                                                                                                            | 1.706                                                                                                             |
| μ, mm <sup>-1</sup>                                 | 1.490                                                                                                                            | 1.701                                                                                                                                            | 1.427                                                                                                             |
| Number of reflections                               | 193117                                                                                                                           | 276977                                                                                                                                           | 78615                                                                                                             |
| Independent reflections                             | 36147                                                                                                                            | 38578                                                                                                                                            | 19393                                                                                                             |
| Fo <sup>2</sup> > 2σ(Fo) <sup>2</sup>               | 17178                                                                                                                            | 18770                                                                                                                                            | 13489                                                                                                             |
| Number of variables                                 | 2120                                                                                                                             | 2058                                                                                                                                             | 1087                                                                                                              |
| R <sub>int</sub> , R <sub>1</sub> , wR <sub>2</sub> | 0.1721, 0.1650, 0.4257                                                                                                           | 0.2104, 0.1184, 0.2354                                                                                                                           | 0.1006, 0.1338, 0.3231                                                                                            |
| CCDC numbers                                        | 1865127                                                                                                                          | 1865128                                                                                                                                          | 1865129                                                                                                           |
| Compounds                                           | [CoY(hfac) <sub>5</sub> (L)]·(CH <sub>2</sub> Cl <sub>2</sub> )<br>(6)                                                           | [CoYb(hfac) <sub>5</sub> (L)]<br>(8)                                                                                                             | [ZnDy(tta) <sub>2</sub> (hfac) <sub>3</sub> (L)]·(CH <sub>2</sub> Cl <sub>2</sub> )<br>(11)                       |
| Formula                                             | C <sub>60</sub> H <sub>37</sub> Cl <sub>2</sub> CoYF <sub>30</sub> N <sub>8</sub> O <sub>10</sub> S <sub>6</sub>                 | C <sub>59</sub> H <sub>35</sub> CoYbF <sub>30</sub> N <sub>8</sub> O <sub>10</sub> S <sub>6</sub>                                                | C <sub>66</sub> H <sub>43</sub> Cl <sub>2</sub> ZnDyF <sub>24</sub> N <sub>8</sub> O <sub>10</sub> S <sub>8</sub> |
| M / g.mol <sup>-1</sup>                             | 2011.07                                                                                                                          | 2010.28                                                                                                                                          | 2119.33                                                                                                           |
| Crystal system                                      | Monoclinic                                                                                                                       | triclinic                                                                                                                                        | triclinic                                                                                                         |
| Space group                                         | P2 <sub>1</sub> /n (N°14)                                                                                                        | P-1 (N°2)                                                                                                                                        | P-1 (N°2)                                                                                                         |
| Cell parameters                                     | a = 13.189(2) Å<br>b = 16.340(3) Å<br>c = 40.379(7) Å<br>β = 98.251(4)°                                                          | a = 12.664(3) Å<br>b = 16.455(4) Å<br>c = 21.398(5) Å<br>α = 90.682(8)°<br>β = 102.892(8)°<br>γ = 93.699(9)°                                     | a = 13.226(3) Å<br>b = 17.850(3) Å<br>c = 21.031(4) Å<br>α = 102.119(5)°<br>β = 93.735(5)°<br>γ = 110.483(5)°     |
| Volume / Å <sup>3</sup>                             | 8612(2)                                                                                                                          | 4335.9(17)                                                                                                                                       | 4495.3(15)                                                                                                        |
| Cell formula units                                  | 4                                                                                                                                | 2                                                                                                                                                | 2                                                                                                                 |
| T / K                                               | 150 (2)                                                                                                                          | 150(2)                                                                                                                                           | 150(2)                                                                                                            |
| Diffraction reflection                              | 2.28 ≤ 2θ ≤ 55.10                                                                                                                | 1.95 ≤ 2θ ≤ 55.12                                                                                                                                | 5.83 ≤ 2θ ≤ 54.97                                                                                                 |
| ρ <sub>calc</sub> , g.cm <sup>-3</sup>              | 1.683                                                                                                                            | 1.540                                                                                                                                            | 1.566                                                                                                             |
| μ, mm <sup>-1</sup>                                 | 1.256                                                                                                                            | 1.524                                                                                                                                            | 1.440                                                                                                             |
| Number of reflections                               | 62407                                                                                                                            | 88634                                                                                                                                            | 82862                                                                                                             |
| Independent reflections                             | 18545                                                                                                                            | 18906                                                                                                                                            | 20454                                                                                                             |
| Fo <sup>2</sup> > 2σ(Fo) <sup>2</sup>               | 5686                                                                                                                             | 6583                                                                                                                                             | 5657                                                                                                              |
| Number of variables                                 | 1140                                                                                                                             | 1074                                                                                                                                             | 1073                                                                                                              |
| R <sub>int</sub> , R <sub>1</sub> , wR <sub>2</sub> | 0.2160, 0.1984, 0.4781                                                                                                           | 0.2107, 0.1496, 0.3248                                                                                                                           | 0.2256, 0.1697, 0.3840                                                                                            |

| CCDC numbers                                        | 1865131                                                                                                        | 1865133                                                                                                                         | 1865134 |
|-----------------------------------------------------|----------------------------------------------------------------------------------------------------------------|---------------------------------------------------------------------------------------------------------------------------------|---------|
| Compounds                                           | [Cu(hfac)(CH <sub>3</sub> OH)(L)]·0.5(C <sub>6</sub> H <sub>14</sub> )<br>( <b>12</b> )                        | [Cu(H <sub>2</sub> O)Dy(hfac) <sub>4</sub> (L)]·[Dy(hfac) <sub>4</sub> ]<br>·(CH <sub>2</sub> Cl <sub>2</sub> ) ( <b>13</b> )   |         |
| Formula                                             | C <sub>31</sub> H <sub>31</sub> CuF <sub>6</sub> N <sub>1</sub> O <sub>3</sub> S <sub>6</sub>                  | C <sub>75</sub> H <sub>42</sub> Cl <sub>2</sub> CuDy <sub>2</sub> F <sub>48</sub> N <sub>8</sub> O <sub>17</sub> S <sub>6</sub> |         |
| M / g.mol <sup>-1</sup>                             | 863.54                                                                                                         | 2888.95                                                                                                                         |         |
| Crystal system                                      | Triclinic                                                                                                      | Triclinic                                                                                                                       |         |
| Space group                                         | P-1 (N°2)                                                                                                      | P-1 (N°2)                                                                                                                       |         |
| Cell parameters                                     | a = 9.7341(18) Å<br>b = 13.820(3) Å<br>c = 15.588(3) Å<br>α = 113.594(6)°<br>β = 107.762(6)°<br>γ = 93.416(6)° | a = 14.501(4) Å<br>b = 19.225(6) Å<br>c = 20.545(6) Å<br>α = 91.777(10)°<br>β = 103.902(9)°<br>γ = 111.996(9)°                  |         |
| Volume / Å <sup>3</sup>                             | 1790.0(6)                                                                                                      | 5108(3)                                                                                                                         |         |
| Cell formula units                                  | 2                                                                                                              | 2                                                                                                                               |         |
| T / K                                               | 150                                                                                                            | 150                                                                                                                             |         |
| Diffraction reflection                              | 4.43 ≤ 2θ ≤ 54.89                                                                                              | 5.83 ≤ 2θ ≤ 54.97                                                                                                               |         |
| ρ <sub>calc</sub> , g.cm <sup>-3</sup>              | 1.602                                                                                                          | 1.878                                                                                                                           |         |
| μ, mm <sup>-1</sup>                                 | 1.029                                                                                                          | 1.981                                                                                                                           |         |
| Number of reflections                               | 36206                                                                                                          | 103507                                                                                                                          |         |
| Independent reflections                             | 8146                                                                                                           | 23325                                                                                                                           |         |
| Fo <sup>2</sup> > 2σ(Fo) <sup>2</sup>               | 5127                                                                                                           | 16423                                                                                                                           |         |
| Number of variables                                 | 442                                                                                                            | 1427                                                                                                                            |         |
| R <sub>int</sub> , R <sub>1</sub> , wR <sub>2</sub> | 0.0814, 0.0707, 0.1821                                                                                         | 0.1656, 0.2073, 0.5031                                                                                                          |         |
| CCDC numbers                                        | 1865130                                                                                                        | 1865132                                                                                                                         |         |

**Table S2.** X-ray crystallographic data for the complexes **14-19**.

| Compounds                              | [Pr(hfac) <sub>3</sub> (L)] <sub>2</sub> ·0.5(C <sub>6</sub> H <sub>14</sub> ) ( <b>14</b> )                     | [Dy <sub>1.21</sub> Nd <sub>0.79</sub> (hfac) <sub>6</sub> (L)]·<br>2(CH <sub>2</sub> Cl <sub>2</sub> )·(C <sub>6</sub> H <sub>14</sub> ) ( <b>15</b> ) | [Dy <sub>1.11</sub> Nd <sub>0.89</sub> (tta) <sub>3</sub> (hfac) <sub>3</sub> (L)]<br>( <b>16</b> )                                 |
|----------------------------------------|------------------------------------------------------------------------------------------------------------------|---------------------------------------------------------------------------------------------------------------------------------------------------------|-------------------------------------------------------------------------------------------------------------------------------------|
| Formula                                | C <sub>101</sub> H <sub>73</sub> Pr <sub>2</sub> F <sub>36</sub> N <sub>16</sub> O <sub>12</sub> S <sub>12</sub> | C <sub>72</sub> H <sub>54</sub> Cl <sub>4</sub> Dy <sub>1.21</sub> Nd <sub>0.79</sub> F <sub>36</sub> N <sub>8</sub> O <sub>12</sub> S <sub>6</sub>     | C <sub>73</sub> H <sub>45</sub> Dy <sub>1.11</sub> Nd <sub>0.89</sub> F <sub>27</sub> N <sub>8</sub> O <sub>12</sub> S <sub>9</sub> |
| M / g.mol <sup>-1</sup>                | 3053.3                                                                                                           | 2550.57                                                                                                                                                 | 2336.46                                                                                                                             |
| Crystal system                         | monoclinic                                                                                                       | monoclinic                                                                                                                                              | Triclinic                                                                                                                           |
| Space group                            | C2/c (N°15)                                                                                                      | P2 <sub>1</sub> /n (N°14)                                                                                                                               | P-1 (N°2)                                                                                                                           |
| Cell parameters                        | a = 42.278(14) Å<br>b = 11.697(4) Å<br>c = 50.539(17) Å<br>β = 92.934(4)°                                        | a = 22.440(2) Å<br>b = 12.6945(12) Å<br>c = 33.791(3) Å<br>β = 100.983(3)°                                                                              | a = 10.170(2) Å<br>b = 16.139(3) Å<br>c = 30.871(6) Å<br>α = 97.354(6)°<br>β = 91.253(6)°<br>γ = 99.875(6)°                         |
| Volume / Å <sup>3</sup>                | 24960(14)                                                                                                        | 9449.7(16)                                                                                                                                              | 4946.0(17)                                                                                                                          |
| Cell formula units                     | 2                                                                                                                | 4                                                                                                                                                       | 2                                                                                                                                   |
| T / K                                  | 150 (2)                                                                                                          | 150(2)                                                                                                                                                  | 150(2)                                                                                                                              |
| Diffraction reflection                 | 5.45 ≤ 2θ ≤ 55.35                                                                                                | 5.86 ≤ 2θ ≤ 54.97                                                                                                                                       | 5.83 ≤ 2θ ≤ 54.96                                                                                                                   |
| ρ <sub>calc</sub> , g.cm <sup>-3</sup> | 1.636                                                                                                            | 1.794                                                                                                                                                   | 1.569                                                                                                                               |
| μ, mm <sup>-1</sup>                    | 1.099                                                                                                            | 1.765                                                                                                                                                   | 1.590                                                                                                                               |
| Number of reflections                  | 72888                                                                                                            | 103333                                                                                                                                                  | 83873                                                                                                                               |
| Independent reflections                | 29067                                                                                                            | 20831                                                                                                                                                   | 21407                                                                                                                               |

|                                                     |                                                                                                                                     |                                                                                                               |                                                                                                   |
|-----------------------------------------------------|-------------------------------------------------------------------------------------------------------------------------------------|---------------------------------------------------------------------------------------------------------------|---------------------------------------------------------------------------------------------------|
| Fo <sup>2</sup> > 2σ(Fo) <sup>2</sup>               | 10203                                                                                                                               | 17401                                                                                                         | 12845                                                                                             |
| Number of variables                                 | 1535                                                                                                                                | 1214                                                                                                          | 1178                                                                                              |
| R <sub>int</sub> , R <sub>1</sub> , wR <sub>2</sub> | 0.2119, 0.1293, 0.2889                                                                                                              | 0.0689, 0.1172, 0.2726                                                                                        | 0.0985, 0.1494, 0.3369                                                                            |
| CCDC numbers                                        | 1865135                                                                                                                             | 1865136                                                                                                       | 1865138                                                                                           |
| Compounds                                           | [Yb <sub>1.04</sub> Nd <sub>0.96</sub> (hfac) <sub>6</sub> (L)]<br>(17)                                                             | [Nd <sub>2</sub> (hfac) <sub>6</sub> (L)]·(C <sub>6</sub> H <sub>14</sub> )<br>(18)                           | [YbPr(hfac) <sub>6</sub> (L)]<br>(19)                                                             |
| Formula                                             | C <sub>64</sub> H <sub>36</sub> Yb <sub>1.04</sub> Nd <sub>0.96</sub> F <sub>36</sub> N <sub>8</sub> O <sub>12</sub> S <sub>6</sub> | C <sub>70</sub> H <sub>50</sub> Nd <sub>2</sub> F <sub>36</sub> N <sub>8</sub> O <sub>12</sub> S <sub>6</sub> | C <sub>64</sub> H <sub>36</sub> YbPrF <sub>36</sub> N <sub>8</sub> O <sub>12</sub> S <sub>6</sub> |
| M / g.mol <sup>-1</sup>                             | 2303.80                                                                                                                             | 2360.02                                                                                                       | 2299.32                                                                                           |
| Crystal system                                      | Monoclinic                                                                                                                          | monoclinic                                                                                                    | monoclinic                                                                                        |
| Space group                                         | P2 <sub>1</sub> /n (N°14)                                                                                                           | P2 <sub>1</sub> /n (N°2)                                                                                      | P2 <sub>1</sub> /n (N°2)                                                                          |
| Cell parameters                                     | a = 22.2669(16) Å<br>b = 12.6525(9) Å<br>c = 33.194(2) Å<br><br>β = 99.920(2)°                                                      | a = 22.811(4) Å<br>b = 12.634(2) Å<br>c = 31.848(6) Å<br><br>β = 103.311(5)°                                  | a = 22.487(5) Å<br>b = 12.711(2) Å<br>c = 33.458(7) Å<br><br>β = 100.768(7)°                      |
| Volume / Å <sup>3</sup>                             | 9212.0(11)                                                                                                                          | 8932(3)                                                                                                       | 9395(3)                                                                                           |
| Cell formula units                                  | 4                                                                                                                                   | 4                                                                                                             | 4                                                                                                 |
| T / K                                               | 150 (2)                                                                                                                             | 150(2)                                                                                                        | 150(2)                                                                                            |
| Diffraction reflection                              | 4.292 ≤ 2θ ≤ 55.16                                                                                                                  | 5.94 ≤ 2θ ≤ 54.96                                                                                             | 5.94 ≤ 2θ ≤ 54.96                                                                                 |
| ρ <sub>calc</sub> , g.cm <sup>-3</sup>              | 1.660                                                                                                                               | 1.755                                                                                                         | 1.626                                                                                             |
| μ, mm <sup>-1</sup>                                 | 1.830                                                                                                                               | 1.425                                                                                                         | 1.731                                                                                             |
| Number of reflections                               | 116477                                                                                                                              | 113102                                                                                                        | 69279                                                                                             |
| Independent reflections                             | 21085                                                                                                                               | 20331                                                                                                         | 20218                                                                                             |
| Fo <sup>2</sup> > 2σ(Fo) <sup>2</sup>               | 11609                                                                                                                               | 6634                                                                                                          | 12433                                                                                             |
| Number of variables                                 | 1323                                                                                                                                | 1155                                                                                                          | 1140                                                                                              |
| R <sub>int</sub> , R <sub>1</sub> , wR <sub>2</sub> | 0.0745, 0.1339, 0.3397                                                                                                              | 0.5182, 0.1417, 0.2339                                                                                        | 0.1091, 0.2464, 0.5190                                                                            |
| CCDC numbers                                        | 1865140                                                                                                                             | 1865139                                                                                                       | 1865137                                                                                           |



**Table S3.** Cell parameters for the compounds **2**, **5**, **7**, **9** and **10**.

| Compounds               | [ZnDy(hfac) <sub>5</sub> (L)]·2(CH <sub>2</sub> Cl <sub>2</sub> )·(C <sub>6</sub> H <sub>14</sub> )<br>( <b>2</b> ) | [MnYb(hfac) <sub>5</sub> (L)]·2(CH <sub>2</sub> Cl <sub>2</sub> )<br>( <b>5</b> )                                            | [CoDy(hfac) <sub>5</sub> (L)]·2(CH <sub>2</sub> Cl <sub>2</sub> )·(C <sub>6</sub> H <sub>14</sub> )<br>( <b>7</b> ) |
|-------------------------|---------------------------------------------------------------------------------------------------------------------|------------------------------------------------------------------------------------------------------------------------------|---------------------------------------------------------------------------------------------------------------------|
| Formula                 | C <sub>67</sub> H <sub>53</sub> Cl <sub>4</sub> ZnDyF <sub>30</sub> N <sub>8</sub> O <sub>10</sub> S <sub>6</sub>   | C <sub>61</sub> H <sub>59</sub> Cl <sub>4</sub> MnYbF <sub>30</sub> N <sub>8</sub> O <sub>10</sub> S <sub>6</sub>            | C <sub>67</sub> H <sub>53</sub> Cl <sub>4</sub> CoDyF <sub>30</sub> N <sub>8</sub> O <sub>10</sub> S <sub>6</sub>   |
| M / g.mol <sup>-1</sup> | 2260.90                                                                                                             | 2166.38                                                                                                                      | 2255.77                                                                                                             |
| Crystal system          | Monoclinic                                                                                                          | Triclinic                                                                                                                    | Monoclinic                                                                                                          |
| Cell parameters         | a = 13.0349(50) Å<br>b = 16.0719(67) Å<br>c = 40.5385(143) Å<br><br>β = 98.7432(113)°                               | a = 12.6744(19) Å<br>b = 17.2322(26) Å<br>c = 19.7161(29) Å<br>α = 93.2236(54)°<br><br>β = 91.3049(54)°<br>γ = 104.6066(61)° | a = 13.0886(24) Å<br>b = 16.1922(30) Å<br>c = 40.6329(76) Å<br><br>β = 99.1885(46)°                                 |
| Volume / Å <sup>3</sup> | 8393.94(912)                                                                                                        | 4157.34(170)                                                                                                                 | 8500.95(457)                                                                                                        |
| Z                       | 4                                                                                                                   | 2                                                                                                                            | 4                                                                                                                   |
| T / K                   | 150 (2)                                                                                                             | 150(2)                                                                                                                       | 150(2)                                                                                                              |
| 2θ range /°             | 4.74 ≤ 2θ ≤ 38.96                                                                                                   | 4.68 ≤ 2θ ≤ 37.92                                                                                                            | 4.72 ≤ 2θ ≤ 37.22                                                                                                   |
| Number of reflections   | 9185                                                                                                                | 5975                                                                                                                         | 9906                                                                                                                |
| Compounds               | [NiDy(hfac) <sub>5</sub> (L)]·2(CH <sub>2</sub> Cl <sub>2</sub> )·(C <sub>6</sub> H <sub>14</sub> )<br>( <b>9</b> ) | [NiYb(hfac) <sub>5</sub> (L)]<br>( <b>10</b> )                                                                               |                                                                                                                     |
| Formula                 | C <sub>67</sub> H <sub>53</sub> Cl <sub>4</sub> NiDyF <sub>30</sub> N <sub>8</sub> O <sub>10</sub> S <sub>6</sub>   | C <sub>59</sub> H <sub>35</sub> NiYbF <sub>30</sub> N <sub>8</sub> O <sub>10</sub> S <sub>6</sub>                            |                                                                                                                     |
| M / g.mol <sup>-1</sup> | 2255.57                                                                                                             | 2010.08                                                                                                                      |                                                                                                                     |
| Crystal system          | Monoclinic                                                                                                          | Triclinic                                                                                                                    |                                                                                                                     |
| Cell parameters         | a = 13.1928(18) Å<br>b = 16.1446(23) Å<br>c = 39.8516(59) Å<br><br>β = 98.7085(46)°                                 | a = 12.7539(33) Å<br>b = 16.3134(45) Å<br>c = 21.1691(56) Å<br>α = 90.6833(80)°<br><br>β = 102.7846(76)°<br>γ = 94.2735(83)° |                                                                                                                     |
| Volume / Å <sup>3</sup> | 8390.22(357)                                                                                                        | 4281.48(325)                                                                                                                 |                                                                                                                     |
| Z                       | 4                                                                                                                   | 2                                                                                                                            |                                                                                                                     |
| T / K                   | 150(2)                                                                                                              | 150(2)                                                                                                                       |                                                                                                                     |
| 2θ range /°             | 4.72 ≤ 2θ ≤ 37.22                                                                                                   | 4.54 ≤ 2θ ≤ 29.22                                                                                                            |                                                                                                                     |
| Number of reflections   |                                                                                                                     | 9872                                                                                                                         |                                                                                                                     |

**Table S4.** Selected intra- and inter-molecular bond lengths (Å) for complexes **1**, **3**, **4**, **6**, **8**, **11** and **13**.

|           | Average<br>d(M-O)/Å    | Average<br>d(M-N)/Å    | Average<br>d(Ln-O)/Å   | Average<br>d(Ln-N)/Å   | Intramolecular<br>d(Ln-M)/Å | Intermolecular<br>d(Ln-M)/Å | Intermolecular<br>d(Ln-Ln)/Å      |
|-----------|------------------------|------------------------|------------------------|------------------------|-----------------------------|-----------------------------|-----------------------------------|
| <b>1</b>  | 2.290(13)<br>2.268(15) | 2.303(14)<br>2.279(18) | 2.375(12)<br>2.343(14) | 2.515(11)<br>2.518(18) | 10.221(3)<br>10.766(3)      | 8.868(2)<br>9.003(2)        | 8.129(2)<br>8.419(2)<br>8.917(2)  |
| <b>3</b>  | 2.102(9)<br>2.088(9)   | 2.102(11)<br>2.109(11) | 2.330(10)<br>2.321(9)  | 2.482(10)<br>2.494(11) | 9.723(3)<br>10.676(4)       | 9.271(3)<br>10.394(3)       | 8.716(2)<br>9.947(2)<br>10.255(2) |
| <b>4</b>  | 2.159(11)              | 2.226(12)              | 2.374(10)              | 2.535(10)              | 10.658(3)                   | 9.072(3)                    | 8.656(2)                          |
| <b>6</b>  | 2.047(13)              | 2.098(14)              | 2.344(13)              | 2.493(14)              | 10.104(3)                   | 9.468(3)                    | 10.283(3)                         |
| <b>8</b>  | 2.069(11)              | 2.074(13)              | 2.343(10)              | 2.480(13)              | 10.018(3)                   | 10.631(3)                   | 9.900(2)                          |
| <b>11</b> | 2.117(13)              | 2.147(16)              | 2.365(11)              | 2.561(11)              | 10.005(3)                   | 11.206(3)                   | 8.989(2)                          |
| <b>13</b> | 2.043(20)              | 1.990(25)              | 2.373(21)<br>2.328(21) | 2.510(30)<br>/         | 10.052(6)                   | 5.989(4)                    | 8.519(3)                          |

**Table S5.** SHAPE analyses of the coordination polyhedra around the lanthanide ion in complexes **1, 3, 4, 6, 8, 11** and **14**.

|    | Metal | CShM <sub>TCTPR-9</sub><br>(Spherical tricapped<br>trigonal prism D <sub>3h</sub> ) | CShM <sub>CSAPR-9</sub><br>(Spherical capped<br>square antiprism C <sub>4v</sub> ) | CShM <sub>MFF-9</sub><br>(Muffin C <sub>s</sub> ) |
|----|-------|-------------------------------------------------------------------------------------|------------------------------------------------------------------------------------|---------------------------------------------------|
| 1  | Dy1   | 0.942                                                                               | 0.936                                                                              | 1.402                                             |
|    | Dy2   | 1.313                                                                               | 0.553                                                                              | 0.931                                             |
| 3  | Yb1   | 1.178                                                                               | 0.497                                                                              | 0.795                                             |
|    | Yb2   | 0.434                                                                               | 0.904                                                                              | 1.551                                             |
| 4  | Dy1   | 1.512                                                                               | 0.708                                                                              | 0.995                                             |
| 6  | Y1    | 0.901                                                                               | 0.854                                                                              | 1.040                                             |
| 8  | Yb1   | 0.466                                                                               | 0.909                                                                              | 1.419                                             |
| 11 | Dy1   | 0.790                                                                               | 1.081                                                                              | 1.474                                             |
| 14 | Pr1   | 1.117                                                                               | 1.828                                                                              | 1.920                                             |
|    | Pr2   | 2.467                                                                               | 1.884                                                                              | 1.319                                             |

**Table S6.** Selected short contacts (Å) and angles (°) for complexes **1, 3, 4, 6, 8, 11** and **13**.

|           | $\alpha/\text{Å}$  | Short<br>contacts/Å |
|-----------|--------------------|---------------------|
| <b>1</b>  | 74.4(4)<br>54.8(6) | S11...O2=3.058      |
|           |                    | S11...S3=3.381      |
|           |                    | S11...S4=3.681      |
|           |                    | S10...S5=3.787      |
|           |                    | S10...S6=3.691      |
| <b>3</b>  | 76.2(3)<br>65.6(3) | S9...S5=3.690       |
|           |                    | S10...S6=3.743      |
|           |                    | S11...S3=3.597      |
|           |                    | S12...S4=3.654      |
| <b>4</b>  | 69.7(4)            | S5...S3=3.748       |
|           |                    | S6...S4=3.759       |
| <b>6</b>  | 76.4(4)            | S5...S3=3.796       |
|           |                    | S6...S4=3.626       |
| <b>8</b>  | 69.8(4)            | S5...S3=3.641       |
|           |                    | S6...S4=3.569       |
| <b>11</b> | 67.7(4)            | S5...S3=3.706       |
|           |                    | S6...S4=3.680       |
| <b>13</b> | 84.6(4)            | S8...S8=3.967       |

**Table S7.** Selected intra- and inter-molecular bond lengths (Å) for complexes **14-19**.

|            | Average<br>d(Ln*-O)/Å  | Average<br>d(Ln*-N)/Å  | Average<br>d(Ln-O)/Å | Average<br>d(Ln-N)/Å | Intramolecular<br>d(Ln-Ln)/Å | Intermolecular<br>d(Ln-Ln)/Å |
|------------|------------------------|------------------------|----------------------|----------------------|------------------------------|------------------------------|
| <b>14</b>  | 2.474(11)<br>2.483(11) | 2.647(12)<br>2.650(12) | /                    | /                    | /                            | 9.592(3)                     |
| <b>15</b>  | 2.414(10)              | 2.573(11)              | 2.347(9)             | 2.547(10)            | 10.895(4)                    | 9.690(3)                     |
| <b>16</b>  | 2.429(13)              | 2.597(14)              | 2.345(11)            | 2.521(12)            | 10.242(4)                    | 8.613(2)                     |
| <b>17</b>  | 2.406(16)              | 2.619(11)              | 2.348(11)            | 2.541(10)            | 10.767(4)                    | 9.098(3)                     |
| <b>18</b>  | 2.433(16)              | 2.623(16)              | 2.419(14)            | 2.623(13)            | 10.890(4)                    | 8.259(3)                     |
| <b>19</b>  | 2.447(19)              | 2.620(19)              | 2.306(17)            | 2.540(19)            | 10.859(4)                    | 9.534(2)                     |
| <b>Dy2</b> | 2.362                  | 2.527                  | 2.339                | 2.527                |                              |                              |
| <b>Yb2</b> | 2.333                  | 2.487                  | 2.295                | 2.490                |                              |                              |

\* Lanthanide ion in the N<sub>3</sub>O<sub>9</sub> coordination site.**Table S8.** Selected short contacts (Å) and angles (°) for complexes **14-19**.

|           | $\alpha$ /Å | Short contacts/Å |
|-----------|-------------|------------------|
| <b>14</b> | 86.1(3)     | S4...S9 = 3.714  |
|           | 86.2(4)     | S4...S10 = 3.719 |
|           |             | S5...S11 = 3.714 |
|           |             | S5...S12 = 3.732 |
| <b>15</b> | 76.1(3)     | S3...S6=3.785    |
| <b>16</b> | 73.5(3)     | S4...S6=3.672    |
| <b>17</b> | 72.6(3)     | S3...S6=3.649    |
| <b>18</b> | 77.9(5)     | S4...S5=3.595    |
| <b>19</b> | 80.8(5)     | S4...S5=3.750    |

**Table S9.** SHAPE analyses of the coordination polyhedra around the lanthanide ion in complexes **15-19**.

|    | Metal   | CShM <sub>SAPR-8</sub><br>(square<br>antiprism D <sub>4d</sub> ) | CShM <sub>TDD-8</sub><br>(triangular<br>dodecahedron<br>D <sub>2d</sub> ) | CShM <sub>BTPR-8</sub><br>(biaugmented<br>trigonal prism<br>C <sub>2v</sub> ) | CShM <sub>TCTPR-9</sub><br>(spherical<br>tricapped<br>trigonal<br>prism D <sub>3h</sub> ) | CShM <sub>CSAPR-9</sub><br>(spherical<br>capped<br>square<br>antiprism<br>C <sub>4v</sub> ) | CShM <sub>MFF-9</sub><br>(Muffin C <sub>s</sub> ) |
|----|---------|------------------------------------------------------------------|---------------------------------------------------------------------------|-------------------------------------------------------------------------------|-------------------------------------------------------------------------------------------|---------------------------------------------------------------------------------------------|---------------------------------------------------|
| 15 | Dy1     | 0.487                                                            | 2.797                                                                     | 2.503                                                                         | -                                                                                         | -                                                                                           | -                                                 |
|    | Nd1/Dy2 | -                                                                | -                                                                         | -                                                                             | 0.663                                                                                     | 1.111                                                                                       | 1.435                                             |
| 16 | Dy1     | 0.908                                                            | 1.796                                                                     | 1.744                                                                         | -                                                                                         | -                                                                                           | -                                                 |
|    | Nd1/Dy2 | -                                                                | -                                                                         | -                                                                             | 0.577                                                                                     | 0.981                                                                                       | 1.486                                             |
| 17 | Yb1     | 0.540                                                            | 2.623                                                                     | 2.403                                                                         | -                                                                                         | -                                                                                           | -                                                 |
|    | Nd1/Yb2 | -                                                                | -                                                                         | -                                                                             | 0.911                                                                                     | 1.097                                                                                       | 1.308                                             |
| 18 | Nd1     | 0.627                                                            | 2.515                                                                     | 2.543                                                                         | -                                                                                         | -                                                                                           | -                                                 |
|    | Nd2     | -                                                                | -                                                                         | -                                                                             | 0.877                                                                                     | 0.844                                                                                       | 1.432                                             |
| 19 | Yb1     | 0.439                                                            | 2.773                                                                     | 2.399                                                                         | -                                                                                         | -                                                                                           | -                                                 |
|    | Pr1     | -                                                                | -                                                                         | -                                                                             | 0.785                                                                                     | 1.198                                                                                       | 1.621                                             |

**Table S10.** Oxidation potentials (V vs SCE, nBu<sub>4</sub>NPF<sub>6</sub>, 0.1 M in CH<sub>2</sub>Cl<sub>2</sub> at 100 mV.s<sup>-1</sup>) of the complexes **1-19**.

|           | E <sup>1</sup> <sub>1/2</sub> / V |                                   | E <sup>2</sup> <sub>1/2</sub> / V |                                   |
|-----------|-----------------------------------|-----------------------------------|-----------------------------------|-----------------------------------|
|           | Ox E <sup>1</sup> <sub>1/2</sub>  | Red E <sup>1</sup> <sub>1/2</sub> | Ox E <sup>2</sup> <sub>1/2</sub>  | Red E <sup>2</sup> <sub>1/2</sub> |
| <b>1</b>  | 0.58                              | 0.46                              | 0.98                              | 0.82                              |
| <b>2</b>  | 0.60                              | 0.51                              | 1.01                              | 0.88                              |
| <b>3</b>  | 0.55                              | 0.44                              | 0.99                              | 0.82                              |
| <b>4</b>  | 0.58                              | 0.46                              | 0.97                              | 0.84                              |
| <b>5</b>  | 0.60                              | 0.45                              | 1.01                              | 0.84                              |
| <b>6</b>  | 0.64                              | 0.45                              | 1.02                              | 0.86                              |
| <b>7</b>  | 0.65                              | 0.45                              | 1.03                              | 0.86                              |
| <b>8</b>  | 0.59                              | 0.48                              | 1.01                              | 0.92                              |
| <b>9</b>  | 0.66                              | 0.49                              | 1.07                              | 0.91                              |
| <b>10</b> | 0.63                              | 0.52                              | 1.05                              | 0.93                              |
| <b>11</b> | 0.64                              | 0.44                              | 1.07                              | 0.86                              |
| <b>12</b> | 0.54                              | 0.45                              | 1.01                              | 0.88                              |
| <b>13</b> | 0.64                              | 0.49                              | 1.05                              | 0.89                              |
| <b>14</b> | 0.71                              | 0.63                              | 0.97                              | 0.89                              |
| <b>15</b> | 0.56                              | 0.46                              | 0.96                              | 0.85                              |
| <b>16</b> | 0.56                              | 0.47                              | 0.99                              | 0.89                              |
| <b>17</b> | 0.56                              | 0.38                              | 1.00                              | 0.85                              |
| <b>18</b> | 0.55                              | 0.45                              | 0.98                              | 0.87                              |
| <b>19</b> | 0.56                              | 0.47                              | 0.99                              | 0.85                              |

**Table S11.** Best fitted parameters ( $\chi_T$ ,  $\chi_S$ ,  $\tau$  and  $\alpha$ ) with the extended Debye model for compound **1** at 1500 Oe in the temperature range 2-9 K.

| T / K | $\chi_T$ / cm <sup>3</sup> mol <sup>-1</sup> | $\chi_S$ / cm <sup>3</sup> mol <sup>-1</sup> | $\alpha$ | $\tau$ / s | R <sup>2</sup> |
|-------|----------------------------------------------|----------------------------------------------|----------|------------|----------------|
| 2     | 5.74167                                      | 0.2865                                       | 0.39965  | 0.06397    | 0.99735        |
| 2.2   | 5.07811                                      | 0.31597                                      | 0.36742  | 0.0428     | 0.99725        |
| 2.4   | 4.50752                                      | 0.31958                                      | 0.34128  | 0.02813    | 0.99707        |
| 2.6   | 4.15552                                      | 0.30284                                      | 0.3244   | 0.02001    | 0.99737        |
| 2.8   | 3.81778                                      | 0.32359                                      | 0.29646  | 0.01447    | 0.99734        |
| 3     | 3.53908                                      | 0.32439                                      | 0.27252  | 0.01061    | 0.99796        |
| 3.5   | 2.98794                                      | 0.32866                                      | 0.22123  | 0.00535    | 0.99756        |
| 4     | 2.6487                                       | 0.31245                                      | 0.20617  | 0.00301    | 0.99891        |
| 4.5   | 2.37043                                      | 0.28171                                      | 0.19205  | 0.00178    | 0.99837        |
| 5     | 2.13267                                      | 0.31976                                      | 0.15966  | 0.00117    | 0.999          |
| 5.5   | 1.94718                                      | 0.29458                                      | 0.15437  | 7.76007E-4 | 0.99921        |
| 6     | 1.78497                                      | 0.29755                                      | 0.14279  | 5.42872E-4 | 0.99904        |
| 7     | 1.5342                                       | 0.31015                                      | 0.10887  | 3.04707E-4 | 0.99974        |
| 8     | 1.3463                                       | 0.33335                                      | 0.08695  | 1.8804E-4  | 0.99951        |
| 9     | 1.20629                                      | 0.38124                                      | 0.07992  | 1.21983E-4 | 0.99849        |

**Table S12.** Best fitted parameters ( $\chi_T$ ,  $\chi_S$ ,  $\tau$  and  $\alpha$ ) with the extended Debye model for compound **2** at 1500 Oe in the temperature range 2-4 K.

| $T / \text{K}$ | $\chi_T / \text{cm}^3 \text{mol}^{-1}$ | $\chi_S / \text{cm}^3 \text{mol}^{-1}$ | $\alpha$ | $\tau / \text{s}$ | $R^2$   |
|----------------|----------------------------------------|----------------------------------------|----------|-------------------|---------|
| 2              | 0.10428                                | 0.573                                  | 0.39965  | 0.06397           | 0.99735 |
| 2.2            | 0.13473                                | 0.63194                                | 0.36742  | 0.0428            | 0.99725 |
| 2.4            | 0.11045                                | 0.63916                                | 0.34128  | 0.02813           | 0.99707 |
| 2.6            | 0.11628                                | 0.60569                                | 0.3244   | 0.02001           | 0.99737 |
| 2.8            | 0.0598                                 | 0.64717                                | 0.29646  | 0.01447           | 0.99734 |
| 3              | 0.0617                                 | 0.64877                                | 0.27252  | 0.01061           | 0.99796 |
| 3.5            | 0.0038                                 | 0.65732                                | 0.22123  | 0.00535           | 0.99756 |
| 4              | 0.00121                                | 0.62489                                | 0.20617  | 0.00301           | 0.99891 |

**Table S13.** Best fitted parameters ( $\chi_T$ ,  $\chi_S$ ,  $\tau$  and  $\alpha$ ) with the extended Debye model for compound **4** at 1500 Oe in the temperature range 2-6.5 K.

| $T / \text{K}$ | $\chi_T / \text{cm}^3 \text{mol}^{-1}$ | $\chi_S / \text{cm}^3 \text{mol}^{-1}$ | $\alpha$ | $\tau / \text{s}$ | $R^2$   |
|----------------|----------------------------------------|----------------------------------------|----------|-------------------|---------|
| 2              | 8.68446                                | 2.22778                                | 0.60558  | 0.0031            | 0.99996 |
| 2.2            | 7.39879                                | 2.70677                                | 0.48646  | 0.00306           | 0.99996 |
| 2.4            | 6.78453                                | 2.63043                                | 0.4442   | 0.00252           | 0.99998 |
| 2.6            | 6.27691                                | 2.56915                                | 0.39582  | 0.00209           | 0.99994 |
| 2.8            | 5.87255                                | 2.4536                                 | 0.36616  | 0.00177           | 0.99992 |
| 3              | 5.51625                                | 2.33696                                | 0.34328  | 0.00151           | 0.99991 |
| 3.5            | 4.7828                                 | 2.20781                                | 0.26189  | 0.00116           | 0.99991 |
| 4              | 4.2342                                 | 1.95039                                | 0.23555  | 7.76975E-4        | 0.99989 |
| 4.5            | 3.80447                                | 1.7619                                 | 0.20807  | 5.6667E-4         | 0.99991 |
| 5              | 3.43519                                | 1.64762                                | 0.18245  | 4.1745E-4         | 0.9999  |
| 5.5            | 3.14067                                | 1.43666                                | 0.18582  | 2.85705E-4        | 0.9999  |
| 6              | 2.88395                                | 1.3657                                 | 0.16602  | 2.17276E-4        | 0.99992 |
| 6.5            | 2.48511                                | 1.20961                                | 0.14519  | 1.27156E-4        | 0.99992 |

**Table S14.** Best fitted parameters ( $\chi_T$ ,  $\chi_S$ ,  $\tau$  and  $\alpha$ ) with the extended Debye model for compound **7** at 1500 Oe in the temperature range 2-4 K.

| $T / \text{K}$ | $\chi_T / \text{cm}^3 \text{mol}^{-1}$ | $\chi_S / \text{cm}^3 \text{mol}^{-1}$ | $\alpha$ | $\tau / \text{s}$ | $R^2$   |
|----------------|----------------------------------------|----------------------------------------|----------|-------------------|---------|
| 2              | 5.85941                                | 0.88878                                | 0.3624   | 0.08478           | 0.99925 |
| 2.2            | 5.35024                                | 0.97461                                | 0.32681  | 0.08041           | 0.99882 |
| 2.4            | 4.98382                                | 1.15039                                | 0.27966  | 0.0481            | 0.99943 |
| 2.6            | 4.6802                                 | 1.07909                                | 0.27301  | 0.03799           | 0.99951 |
| 2.8            | 4.52946                                | 0.87925                                | 0.3065   | 0.03278           | 0.99962 |
| 3              | 4.23086                                | 0.81738                                | 0.28879  | 0.02845           | 0.99958 |
| 3.5            | 3.71686                                | 0.6043                                 | 0.28288  | 0.01851           | 0.99978 |
| 4              | 3.31412                                | 0.36234                                | 0.30653  | 0.01956           | 0.99948 |

**Table S15.** Best fitted parameters ( $\chi_T$ ,  $\chi_S$ ,  $\tau$  and  $\alpha$ ) with the extended Debye model for compound **11** at 1500 Oe in the temperature range 2-4.5 K.

| $T / \text{K}$ | $\chi_T / \text{cm}^3 \text{mol}^{-1}$ | $\chi_S / \text{cm}^3 \text{mol}^{-1}$ | $\alpha$ | $\tau / \text{s}$ | $R^2$   |
|----------------|----------------------------------------|----------------------------------------|----------|-------------------|---------|
| 2              | 5.26007                                | 0.21482                                | 0.32753  | 0.00106           | 0.99986 |
| 2.2            | 4.91727                                | 0.24516                                | 0.32705  | 8.60562E-4        | 0.99986 |
| 2.4            | 4.56367                                | 0.26842                                | 0.33191  | 6.60046E-4        | 0.99983 |
| 2.6            | 4.27844                                | 0.25961                                | 0.33122  | 5.1069E-4         | 0.99989 |
| 2.8            | 4.02019                                | 0.31684                                | 0.331    | 4.15771E-4        | 0.99989 |
| 3              | 3.79369                                | 0.29642                                | 0.34117  | 3.19953E-4        | 0.99991 |
| 3.5            | 3.31336                                | 0.42175                                | 0.33377  | 2.04467E-4        | 0.99992 |
| 4              | 2.94674                                | 0.45434                                | 0.34921  | 1.25088E-4        | 0.99994 |
| 4.5            | 2.64968                                | 0.54061                                | 0.34784  | 8.93361E-5        | 0.99992 |

**Table S16.** Best fitted parameters ( $\chi_T$ ,  $\chi_S$ ,  $\tau_1$ ,  $\tau_2$ ,  $\alpha$  and  $\beta$ ) with the extended Debye model for compound **15** at 1500 Oe in the temperature range 2-12 K.  $\tau_1$  and  $\tau_2$  are the two relaxation times and  $\beta$  the ratio between the these two processes amplitude.

| $T / \text{K}$ | $\chi_T / \text{cm}^3 \text{mol}^{-1}$ | $\chi_S / \text{cm}^3 \text{mol}^{-1}$ | $\beta$      | $\tau_1 / \text{s}$ | $\tau_2 / \text{s}$ | $\alpha$ | $R^2$   |
|----------------|----------------------------------------|----------------------------------------|--------------|---------------------|---------------------|----------|---------|
| 2              | 0.29098                                | 9.71031                                | 0.71674      | 1.20776             | 0.00147             | 0.49133  | 0.99991 |
| 2.2            | 0.33675                                | 9.16813                                | 0.72201      | 1.05834             | 0.00129             | 0.48042  | 0.99991 |
| 2.4            | 0.40459                                | 7.54444                                | 0.70305      | 0.47535             | 9.85863E-4          | 0.44512  | 0.99991 |
| 2.6            | 0.40065                                | 6.90708                                | 0.70129      | 0.34022             | 7.50432E-4          | 0.43166  | 0.99994 |
| 2.8            | 0.42787                                | 6.34207                                | 0.70373      | 0.23943             | 5.95928E-4          | 0.41633  | 0.9999  |
| 3              | 0.46974                                | 5.79555                                | 0.70424      | 0.16428             | 5.00198E-4          | 0.39284  | 0.99994 |
| 3.5            | 0.5448                                 | 4.91337                                | 0.71722      | 0.08112             | 3.37201E-4          | 0.35028  | 0.99996 |
| 4              | 0.58094                                | 4.26523                                | 0.73301      | 0.04274             | 2.22346E-4          | 0.31635  | 0.99994 |
| 4.5            | 0.58303                                | 3.78414                                | 0.74005      | 0.02527             | 1.60362E-4          | 0.28558  | 0.99993 |
| 5              | 0.31324                                | 3.42732                                | 0.71 (fixed) | 0.01503             |                     | 0.28888  | 0.99973 |
| 5.5            | 0.31759                                | 3.10998                                | 0.71 (fixed) | 0.00988             |                     | 0.26658  | 0.99979 |
| 6              | 0.32595                                | 2.85059                                | 0.71 (fixed) | 0.00678             |                     | 0.2513   | 0.99975 |
| 7              | 0.36286                                | 2.44538                                | 0.71 (fixed) | 0.00351             |                     | 0.22921  | 0.99975 |
| 8              | 0.44256                                | 2.14006                                | 0.71 (fixed) | 0.00197             |                     | 0.20916  | 0.99983 |
| 9              | 0.55738                                | 1.89957                                | 0.71 (fixed) | 0.00114             |                     | 0.18777  | 0.99983 |
| 10             | 0.84504                                | 1.72001                                |              | 5.01853E-4          |                     | 0.23088  | 0.99986 |
| 11             | 0.89023                                | 1.56452                                |              | 2.67254E-4          |                     | 0.21843  | 0.9999  |
| 12             | 0.93013                                | 1.42503                                |              | 1.34871E-4          |                     | 0.20637  | 0.99997 |

**Table S17.** Parameters of the magnetic relaxation processes for the heterobimetallic compounds.

| Compounds |     | Orbach                    |                     | Raman                            |          |
|-----------|-----|---------------------------|---------------------|----------------------------------|----------|
|           |     | $\tau_0 / \text{s}$       | $\Delta / \text{K}$ | $C / \text{s}^{-1}\text{K}^{-n}$ | $n$      |
| <b>1</b>  |     | $5.84(11) \times 10^{-5}$ | 21.1(7)             | 0.94(3)                          | 4.03(3)  |
| <b>2</b>  |     | $1.50(89) \times 10^{-8}$ | 31.8(25)            | 392.2(56)                        | 2.46(19) |
| <b>4</b>  |     | $3.64(66) \times 10^{-6}$ | 25.9(12)            | 81.6(73)                         | 1.55(11) |
| <b>7</b>  |     | $6.82(39) \times 10^{-8}$ | 26.7(24)            | 405.1(16)                        | 1.36(55) |
| <b>9</b>  |     | $3.18(34) \times 10^{-8}$ | 31.7(47)            | 1598.8(87)                       | 2.18(7)  |
| <b>11</b> |     | $3.84(76) \times 10^{-6}$ | 16.0(22)            | 233(111)                         | 1.86(80) |
| <b>15</b> | Dy1 | /                         | /                   | 0.03(1)                          | 4.77(10) |
|           | Dy2 | /                         | /                   | 90.45(6)                         | 2.81(6)  |
| <b>16</b> |     | $3.07(24) \times 10^{-4}$ | 13.4(5)             | /                                | /        |

## References

- 1 M. F. Richardson, W. F. Wagner and D. E. Sands, *J. Inorg. Nucl. Chem.*, 1968, **30**, 1275-1289.
- 2 A. I. Vooshin, N. M. Shavaleev and V. P. Kazakov, *J. Lumin.* 2000, **91**, 49-58.
- 3 M. Feng, F. Pointillart, B. Lefevre, V. Dorcet, S. Golhen, O. Cador and L. Ouahab, *Inorg. Chem.*, 2015, **54**, 4021-4028.
- 4 G. M. Sheldrick, *Acta Crystallogr., Sect. A Found Adv.*, 2015, **71**, 3-8.
- 5 G. M. Sheldrick, *Acta Crystallogr. Sect. C*, 2015, **71**, 3-8.
- 6 A. L. Spek, *J. Appl. Crystallogr.*, 2003, **36**, 7-13.
